# Supplementary material for: Unveiling the abnormal effect of temperature on enantioselectivity in the palladium-mediated decabonylative alkylation of MBH acetate
Source: Royal Society of Chemistry journal article supplement (doi:10.1039/d1qo00782c), 2021-01-01
Supplement: d1qo00782c1.pdf [file d1qo00782c1.pdf]

## Electronic Supplementary Information

### Unveiling Abnormal Effect of Temperature on Enantioselectivity in Palladium-mediated Decarbonylative Alkylation of MBH Acetate

Xian-Zhou Zheng,<sup>[a]</sup> Kai Chen,<sup>[a,c]\*</sup> Jun-An Xiao,<sup>[b]\*</sup> Jun Li,<sup>[a]</sup> Sha-Sha Wang,<sup>[a]</sup> Qing-Lan Zhao,<sup>[a]</sup> Hao-Yue Xiang,<sup>[a]</sup> Xiao-Qing Chen<sup>[a]</sup> and Hua Yang<sup>[a]\*</sup>

<sup>[a]</sup>College of Chemistry and Chemical Engineering, Central South University, Changsha 410083, P. R. China

<sup>[b]</sup>College of Chemistry and Materials Science, Guangxi Key Laboratory of Natural Polymer Chemistry and Physics, Nanning Normal University, Nanning 530001, P. R. China

<sup>[c]</sup>State Key Laboratory of Chemical Oncogenomics, Peking University Shenzhen Graduate School  
Shenzhen 518055, P. R. China

E-mail: [hyangchem@csu.edu.cn](mailto:hyangchem@csu.edu.cn); [jaxiao@nnu.edu.cn](mailto:jaxiao@nnu.edu.cn); [kaichen@csu.edu.cn](mailto:kaichen@csu.edu.cn)

## Table of Contents

|                                                                   |            |
|-------------------------------------------------------------------|------------|
| <b>1. General Information .....</b>                               | <b>S3</b>  |
| <b>2. Screening of the reaction conditions .....</b>              | <b>S4</b>  |
| <b>3. Mechanistic studies on the reaction.....</b>                | <b>S7</b>  |
| <b>4. Computational details.....</b>                              | <b>S13</b> |
| <b>5. Experimental procedures and characterization data .....</b> | <b>S47</b> |
| <b>6. X-ray single crystal structure for 3c.....</b>              | <b>S60</b> |
| <b>7. References .....</b>                                        | <b>S61</b> |

## 1. General Information

Unless otherwise noted, all the reagents were purchased from commercial suppliers and used without further purification.  $^1\text{H}$  NMR spectra were recorded at 400 MHz. The chemical shifts were recorded in *ppm* relative to tetramethylsilane and with the solvent resonance as the internal standard. Data were reported as follows: chemical shift, multiplicity (*s* = singlet, *d* = doublet, *t* = triplet, *q* = quartet, *m* = multiplet), coupling constants (Hz), integration.  $^{13}\text{C}$  NMR data were collected at 100 MHz with complete proton decoupling. Chemical shifts were reported in *ppm* from the tetramethylsilane with the solvent resonance as internal standard. Infrared spectra (IR) were measured by FT-IR apparatus. High resolution mass spectroscopy (HRMS) was recorded on TOF MS mass spectrometer and acetonitrile was used to dissolve the sample. Column chromatography was carried out on silica gel (200-300 mesh). All solvents and commercially available reagents were either purified via literature procedures or used without further purification. 4,4,4-Trifluoro-1-phenyl-1,3-butanedione<sup>1</sup> and  $\beta$ -*oxo*-benzenepropanoic acid<sup>2</sup> were synthesized according to the references.

## 2. Screening of the reaction conditions

**Table S1. Optimization of Reaction Conditions.<sup>a</sup>**

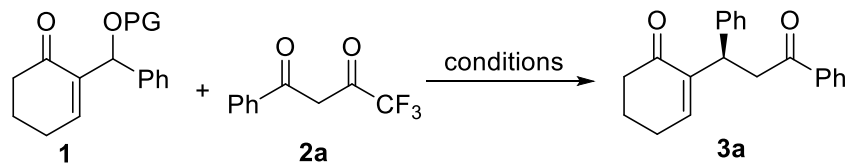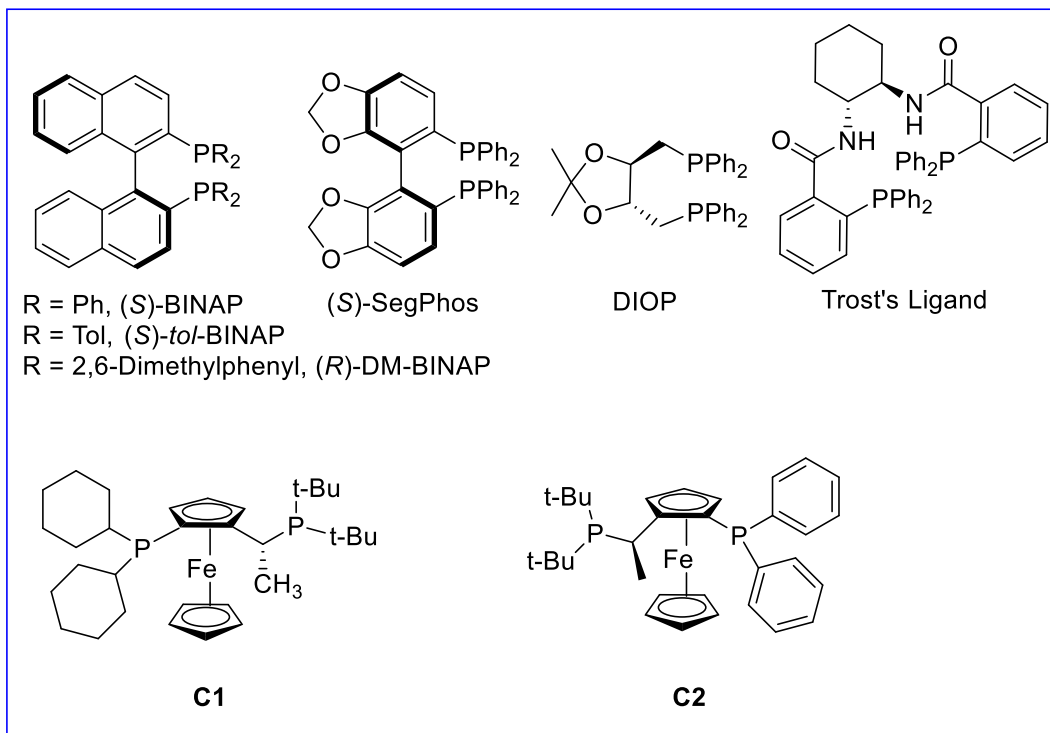

| Entry           | <b>1a:2a</b> | Pd source<br>(5 mol%)                              | ligand<br>(10 mol%)     | base<br>(2.0 equiv)                | yield<br>(%) | <i>er</i>        |
|-----------------|--------------|----------------------------------------------------|-------------------------|------------------------------------|--------------|------------------|
| 1               | 1.2:1        | Pd(OAc) <sub>2</sub>                               | ( <i>S</i> )-BINAP      | K <sub>2</sub> CO <sub>3</sub>     | 47           | 82.5:17.5        |
| 2               | 1.5:1        | Pd(OAc) <sub>2</sub>                               | ( <i>S</i> )-BINAP      | K <sub>2</sub> CO <sub>3</sub>     | 62           | 82.5:17.5        |
| 3               | 2:1          | Pd(OAc) <sub>2</sub>                               | ( <i>S</i> )-BINAP      | K <sub>2</sub> CO <sub>3</sub>     | 64           | 87:13            |
| 4               | 1:1.5        | Pd(OAc) <sub>2</sub>                               | ( <i>S</i> )-BINAP      | K <sub>2</sub> CO <sub>3</sub>     | 47           | 80:20            |
| 5               | 1:2          | Pd(OAc) <sub>2</sub>                               | ( <i>S</i> )-BINAP      | K <sub>2</sub> CO <sub>3</sub>     | 48           | 81.5:18.5        |
| 6               | 2:1          | Pd(OAc) <sub>2</sub>                               | ( <i>S</i> )-BINAP      | Et <sub>3</sub> N                  | decomposed   | -                |
| 7               | 2:1          | Pd(OAc) <sub>2</sub>                               | ( <i>S</i> )-BINAP      | DIPEA                              | decomposed   | -                |
| 8               | 2:1          | Pd(OAc) <sub>2</sub>                               | ( <i>S</i> )-BINAP      | CsCO <sub>3</sub>                  | 54           | 85.5:14.5        |
| 9               | 2:1          | Pd(OAc) <sub>2</sub>                               | ( <i>S</i> )-BINAP      | KOH                                | 51           | 81.5:18.5        |
| <b>10</b>       | <b>2:1</b>   | <b>Pd(OAc)<sub>2</sub></b>                         | <b>(<i>S</i>)-BINAP</b> | <b>K<sub>3</sub>PO<sub>4</sub></b> | <b>65</b>    | <b>88.5:11.5</b> |
| 11              | 2:1          | Pd(OAc) <sub>2</sub>                               | ( <i>S</i> )-BINAP      | K <sub>2</sub> HPO <sub>4</sub>    | 54           | 84:16            |
| 12              | 2:1          | Pd <sub>2</sub> (dba) <sub>3</sub>                 | ( <i>S</i> )-BINAP      | K <sub>3</sub> PO <sub>4</sub>     | 67           | 78:22            |
| 13              | 2:1          | PdCl <sub>2</sub>                                  | ( <i>S</i> )-BINAP      | K <sub>3</sub> PO <sub>4</sub>     | 52           | 77:23            |
| 14              | 2:1          | PdCl <sub>2</sub> (PPh <sub>3</sub> ) <sub>2</sub> | ( <i>S</i> )-BINAP      | K <sub>3</sub> PO <sub>4</sub>     | 41           | 80:20            |
| 15              | 2:1          | Pd(OAc) <sub>2</sub>                               | ( <i>S</i> )-Tol-BINAP  | K <sub>3</sub> PO <sub>4</sub>     | 59           | 87:13            |
| 16              | 2:1          | Pd(OAc) <sub>2</sub>                               | ( <i>R</i> )-DM-BINAP   | K <sub>3</sub> PO <sub>4</sub>     | 44           | 12.5:87.5        |
| 17              | 2:1          | Pd(OAc) <sub>2</sub>                               | ( <i>S</i> )-SegPhos    | K <sub>3</sub> PO <sub>4</sub>     | 36           | 84:16            |
| 18              | 2:1          | Pd(OAc) <sub>2</sub>                               | DIOP                    | K <sub>3</sub> PO <sub>4</sub>     | 62           | 50:50            |
| 19              | 2:1          | Pd(OAc) <sub>2</sub>                               | Trost's ligand          | K <sub>3</sub> PO <sub>4</sub>     | nr           | -                |
| 20              | 2:1          | Pd(OAc) <sub>2</sub>                               | <b>C1</b>               | K <sub>3</sub> PO <sub>4</sub>     | 13           | 47:53            |
| 21              | 2:1          | Pd(OAc) <sub>2</sub>                               | <b>C2</b>               | K <sub>3</sub> PO <sub>4</sub>     | 20           | 18.5:81.5        |
| 22 <sup>b</sup> | 2:1          | Pd(OAc) <sub>2</sub>                               | ( <i>S</i> )-BINAP      | K <sub>3</sub> PO <sub>4</sub>     | 49           | 68.5:31.5        |
| 23 <sup>c</sup> | 2:1          | Pd(OAc) <sub>2</sub>                               | ( <i>S</i> )-BINAP      | K <sub>3</sub> PO <sub>4</sub>     | 61           | 83:17            |
| 24 <sup>d</sup> | 2:1          | Pd(OAc) <sub>2</sub>                               | ( <i>S</i> )-BINAP      | K <sub>3</sub> PO <sub>4</sub>     | 9            | 82:18            |
| 25 <sup>e</sup> | 2:1          | Pd(OAc) <sub>2</sub>                               | ( <i>S</i> )-BINAP      | K <sub>3</sub> PO <sub>4</sub>     | trace        | -                |

<sup>a</sup> Unless otherwise noted, the reaction was performed on 0.2 mmol scale with 0.4 mmol of MBH ester **1a** and 0.2 mmol of 1,3-diketones **2a** in toluene (2.0 mL) at 140 °C for three minutes under the given conditions, PG = Ac. <sup>b</sup>PG = CO<sub>2</sub>Et. <sup>c</sup>PG = Boc. <sup>d</sup>Slow addition of MBH acetate **1a** within three minutes. <sup>e</sup> Slow addition of 1,3-diketones **2a** within three minutes.

**Table S2. Screening of Reaction Partners.**

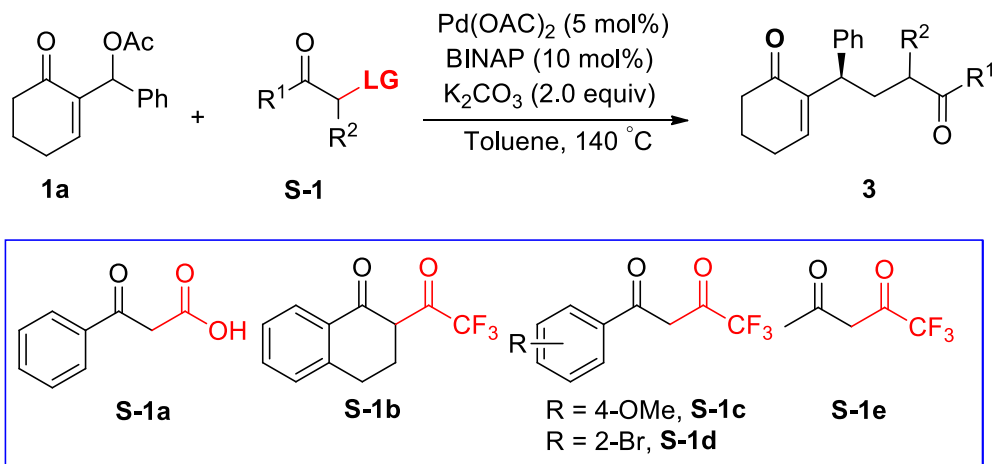

| Entry | S-1         | LG              | T (°C) | time   | yield (%) | er        |
|-------|-------------|-----------------|--------|--------|-----------|-----------|
| 1     | <b>S-1a</b> | COOH            | 60     | 24 h   | 8         | 72:28     |
| 2     | <b>S-1a</b> | COOH            | 90     | 6 h    | 14        | 75.5:24.5 |
| 3     | <b>S-1a</b> | COOH            | 140    | 5 min  | 31        | 72.5:27.5 |
| 4     | <b>S-1b</b> | CF <sub>3</sub> | 140    | 10 min | NR        | -         |
| 6     | <b>S-1c</b> | CF <sub>3</sub> | 140    | 30 min | NR        | -         |
| 7     | <b>S-1d</b> | CF <sub>3</sub> | 140    | 30 min | NR        | -         |
| 5     | <b>S-1e</b> | CF <sub>3</sub> | 140    | 5 min  | complex   | -         |

<sup>a</sup> Unless otherwise noted, the reaction was performed on 0.2 mmol of MBH ester **1a** and 0.2 mmol of  $\beta$ -oxo-benzenepropanoic acid (**S-1a**) or 1,3-diones (**S-1b-1e**) in presence of 5 mol% of Pd(OAc)<sub>2</sub>, 10 mol% of S-BINAP and 2.0 equiv of K<sub>2</sub>CO<sub>3</sub> in toluene (2 mL) at 140 °C.

In order to identify the activator in the reactant,  $\beta$ -oxo-benzenepropanoic acid<sup>3</sup> was evaluated in the reaction. Compared with the reaction using 1-phenyl-4,4,4-trifluoro-1,3-butanedione, the corresponding product **3** was obtained with relatively lower yield and *er* (entry 1-3). Furthermore, 3,4-dihydro-2-(2,2,2-trifluoroacetyl)-1(2*H*)-naphthalenone,<sup>4</sup> 4,4,4-trifluoro-1-(4-methoxyphenyl)-1,3-butanedione<sup>5</sup> and 1-(2-bromophenyl)-4,4,4-trifluoro-1,3-butanedione<sup>6</sup> were inactive in the reaction. The employment of 1,1,1-trifluoro-2,4-pentanedione<sup>7</sup> gave a complicated reaction, which was extremely difficult to isolate the corresponding product.

### 3. Mechanistic studies on the reaction

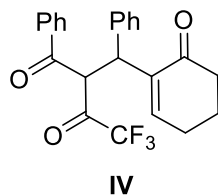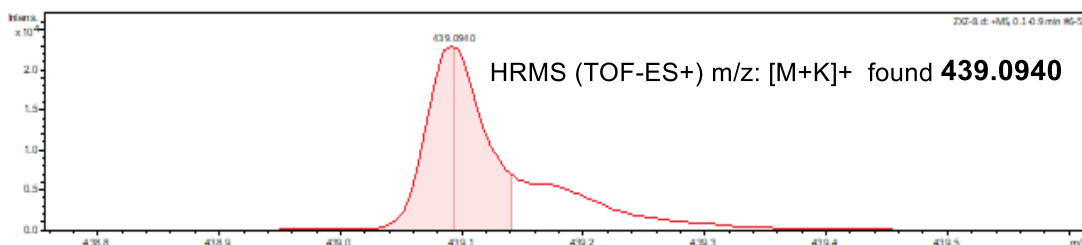

**Figure S1** Experimental support of key intermediate from HRMS analysis

The allylic alkylation adduct **IV** was found by HRMS analysis HRMS (TOF-ES<sup>+</sup>) m/z: [M+K]<sup>+</sup> calcd for C<sub>23</sub>H<sub>17</sub>O<sub>3</sub>K 439.0918, found 439.0940.

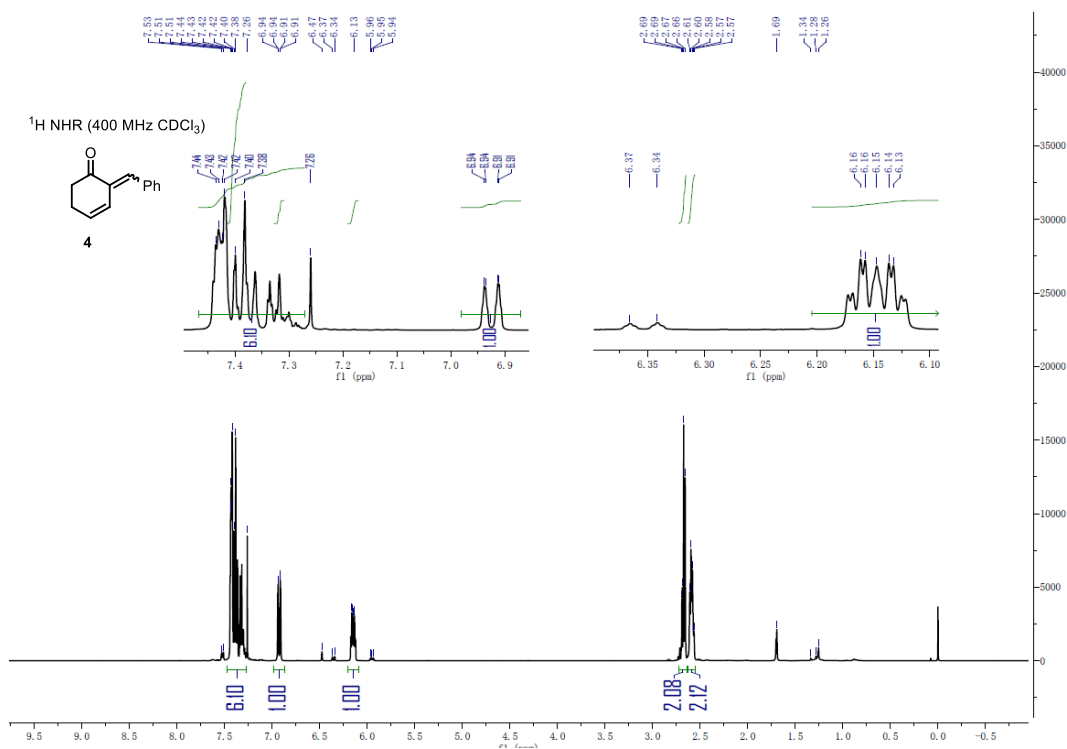

**Figure S2.** Evidence of the side product from <sup>1</sup>H NMR analysis

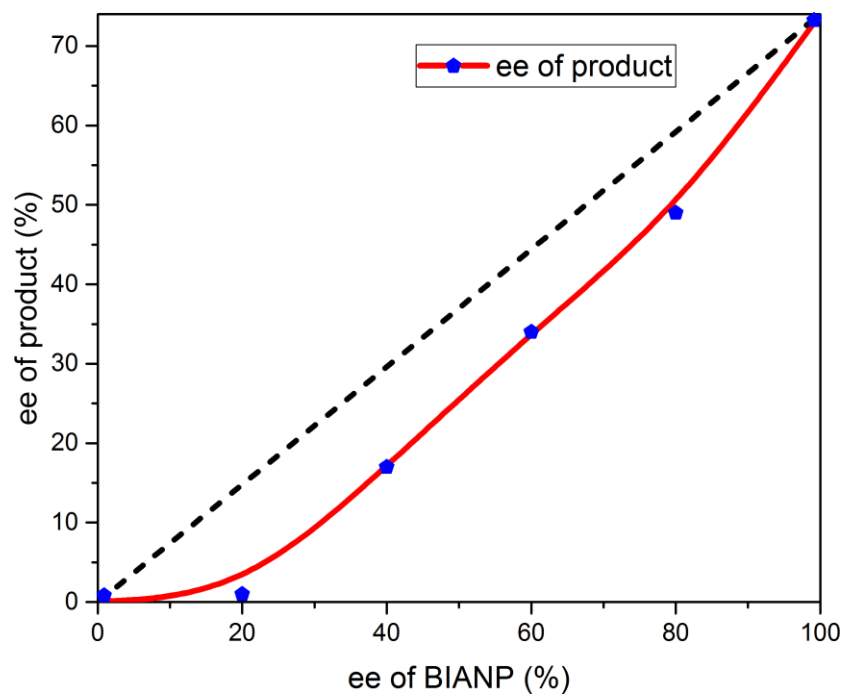

**Figure S3. Nonlinear relationship of *S*-BINAP and product.**



**Table S3. Relationship of Enantioselectivity and Reaction Temperature.<sup>a</sup>**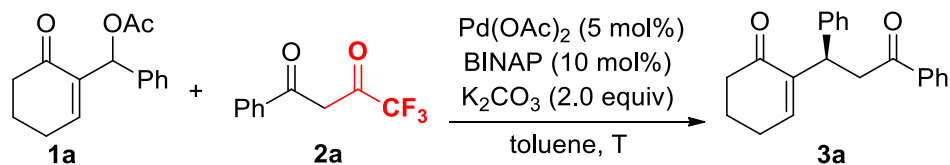

| Entry | T (°C) | time   | yield (%) | er                     |
|-------|--------|--------|-----------|------------------------|
| 1     | rt     | 120 h  | -         | -                      |
| 2     | 40     | 72 h   | 21        | 57.5:42.5              |
| 3     | 60     | 12 h   | 25        | 62:38                  |
| 4     | 70     | 9 h    | 28        | 64.5:35.5              |
| 5     | 80     | 6 h    | 31        | 73:27                  |
| 6     | 90     | 3 h    | 34        | 77:23                  |
| 7     | 100    | 1 h    | 44        | 78.5:21.5              |
| 8     | 110    | 30 min | 43        | 80:20                  |
| 9     | 120    | 20 min | 44        | 83:17                  |
| 10    | 130    | 10 min | 35        | 84:16                  |
| 11    | 140    | 5 min  | 37        | 86:14                  |
| 12    | 150    | 3 min  | 23        | 85.5:14.5 <sup>b</sup> |
| 13    | 160    | 2 min  | 24        | 84.5:15.5 <sup>b</sup> |

<sup>a</sup> Unless otherwise noted, the reaction was performed on 0.2 mmol scale with 0.2 mmol of MBH ester **1a** and 0.2 mmol of 1,3-diketones **2a** in toluene (2.0mL) under given conditions. <sup>b</sup> The reaction was performed in mesitylene.

**Table S4. Relationship of Enantioselectivity and *ee* of *S*-BINAP.<sup>a</sup>**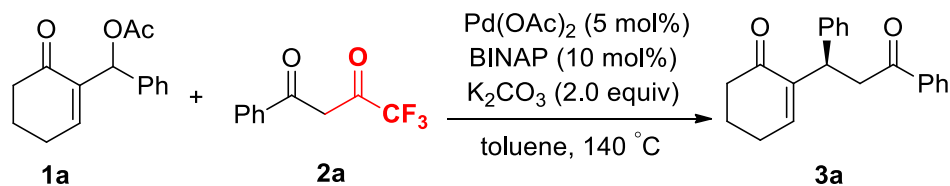

| Entry | <i>ee</i> of <i>S</i> -BINAP (%) | er        | yield (%) |
|-------|----------------------------------|-----------|-----------|
| 1     | 100                              | 87:13     | 62        |
| 2     | 80                               | 74.5:25.5 | 48        |
| 3     | 60                               | 67:33     | 42        |
| 4     | 40                               | 58.5:41.5 | 47        |
| 5     | 20                               | 50.5:49.5 | 43        |
| 6     | 0                                | 50:50     | 53        |

<sup>a</sup> Unless otherwise noted, the reaction was performed on 0.2 mmol of MBH ester **1a** and 0.2 mmol of 1,3-diketone **2a** in presence of 5 mol% of Pd(OAc)<sub>2</sub>, 10 mol% of *S*-BINAP and 2.0 equiv of K<sub>2</sub>CO<sub>3</sub> in toluene (2 mL) at 140 °C.

**Table S5. Monitoring the Progress of Reaction.**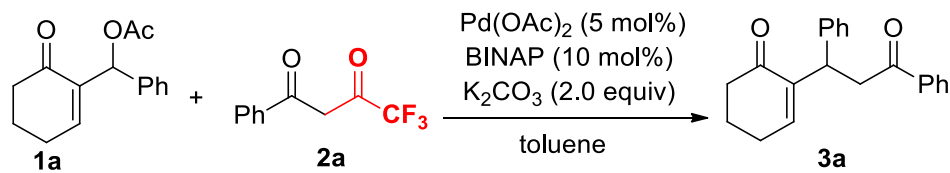

| Entry | Time (min) | er        |
|-------|------------|-----------|
| 1     | 60         | 84.5:15.5 |
| 2     | 120        | 78.5:11.5 |
| 3     | 180        | 63:37     |
| 4     | 240        | 65:35     |
| 5     | 300        | 65:35     |
| 6     | 360        | 63.5:36.5 |
| 7     | 420        | 65:35     |

The reaction was performed on 0.2 mmol scale with 0.2 mmol of MBH ester **1a** and 0.2 mmol of 1,3-diketones **2a** in toluene (2.0 mL) at **70 °C**.

| Entry | Time (min) | er        |
|-------|------------|-----------|
| 1     | 40         | 86:14     |
| 2     | 70         | 81.5:18.5 |
| 3     | 90         | 79:21     |
| 4     | 110        | 77.5:22.5 |
| 5     | 140        | 77:23     |
| 6     | 180        | 77:23     |
| 7     | 240        | 77:23     |

The reaction was performed on 0.2 mmolscale with 0.2 mmol of MBH ester **1a** and 0.2 mmol of 1,3-diketones **2a** in toluene (2.0 mL) at **90 °C**.

| Entry | Time (min) | er        |
|-------|------------|-----------|
| 1     | 6          | 84:16     |
| 2     | 10         | 82:18     |
| 3     | 15         | 78.5:21.5 |
| 4     | 20         | 78.5:21.5 |
| 5     | 25         | 78.5:21.5 |
| 6     | 30         | 78.5:21.5 |

The reaction was performed on 0.2 mmolscale with 0.2 mmol of MBH ester **1a** and 0.2 mmol of 1,3-diketones **2a** in toluene (2.0 mL) at **110 °C**.

| Entry | Time (min) | er        |
|-------|------------|-----------|
| 1     | 0.5        | 85.5:14.5 |
| 2     | 1          | 86:14     |
| 3     | 1.5        | 86:14     |
| 4     | 2          | 86:14     |
| 5     | 2.5        | 85.5:14.5 |
| 6     | 3          | 86:14     |

The reaction was performed on 0.2 mmol scale with 0.2 mmol of MBH ester **1a** and 0.2 mmol of 1,3-diketones **2a** in toluene (2.0 mL) at **140 °C**.

## Studies on the effects of addition mode.

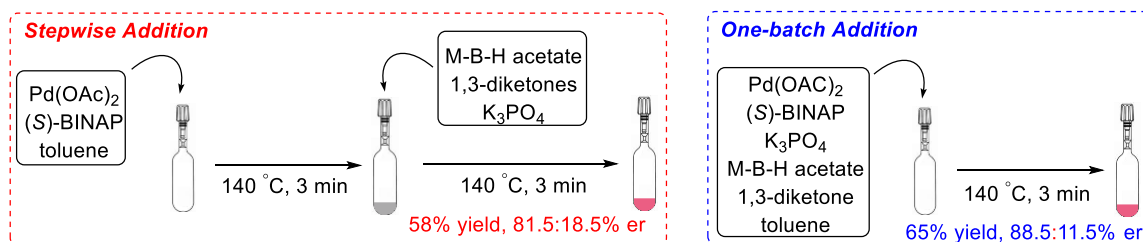

**Figure S4. Different Modes for Addition of Reagents**

The addition modes of reaction reagents were investigated.<sup>8</sup> **Stepwise mode:** Pd(OAc)<sub>2</sub> and (S)-BINAP and toluene were added to the seal tube firstly. And MBH acetate, 1,3-diketones and K<sub>3</sub>PO<sub>4</sub> were then added to the reaction system. **One-batch Addition:** Pd(OAc)<sub>2</sub>, (S)-BINAP, MBH acetate, 1,3-diketones, K<sub>3</sub>PO<sub>4</sub> and toluene were added to the seal tube sequentially. The resulting mixture was then stirred at the given temperature.

## 4. Computational details

DFT calculations were performed with Gaussian 16 program.<sup>9</sup> The hybrid B3LYP functional<sup>10,11</sup> in conjunction with the def2-SVP basis set<sup>12,13</sup> was applied for the optimization of all stationary points. Empirical dispersion was included using the D3 version of Grimme's dispersion with Becke-Johnson damping.<sup>14</sup> Frequency calculations were performed at the same level to confirm whether each stationary point was either a minimum or a transition structure. Single point energy calculations were carried out with Truhlar's M06 functional<sup>15</sup> with def2-TZVPP basis set.<sup>12, 13</sup> Solvent effect of toluene was considered with SMD solvent model for all calculations with solvent accessible surface (SAS) for optimizations and solvent excluding surface (SES) for single point energy calculations.<sup>16</sup> For each stationary point, the free energy corrections were calculated using Grimme's quasiharmonic approximation<sup>17</sup> with GoodVibes.<sup>18</sup> Computed structures were illustrated using CYLView.<sup>19</sup>

### 4.1 Transition state structures of the acetate dissociation steps.

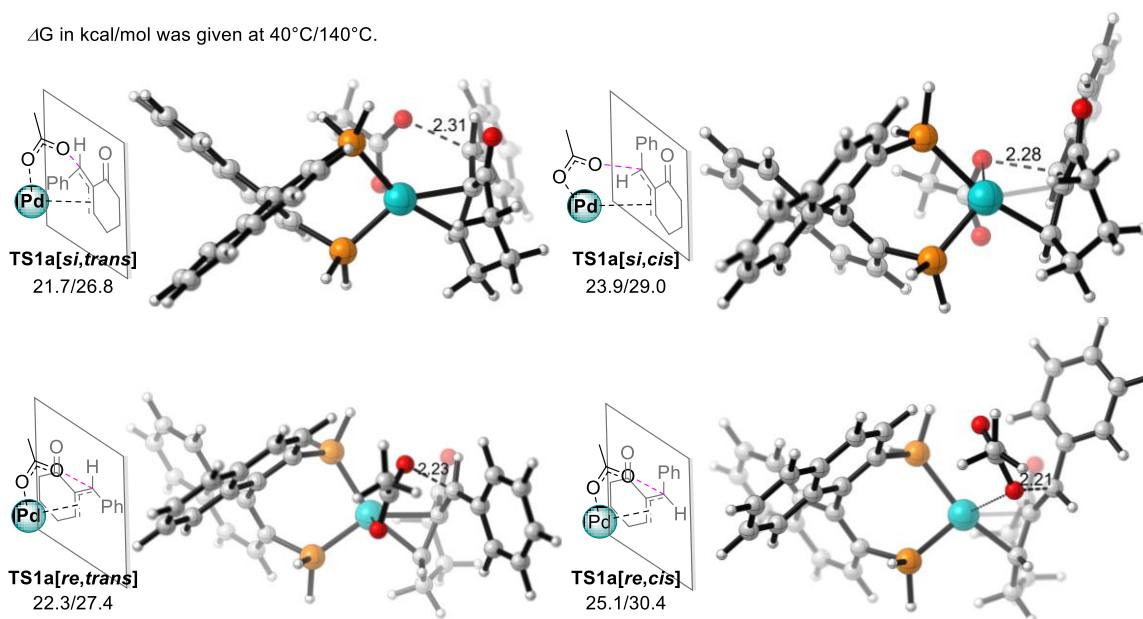

## 4.2 Transition state structures of the nucleophilic attacking steps.

$\Delta G$  in kcal/mol was given at 40°C/140°C.

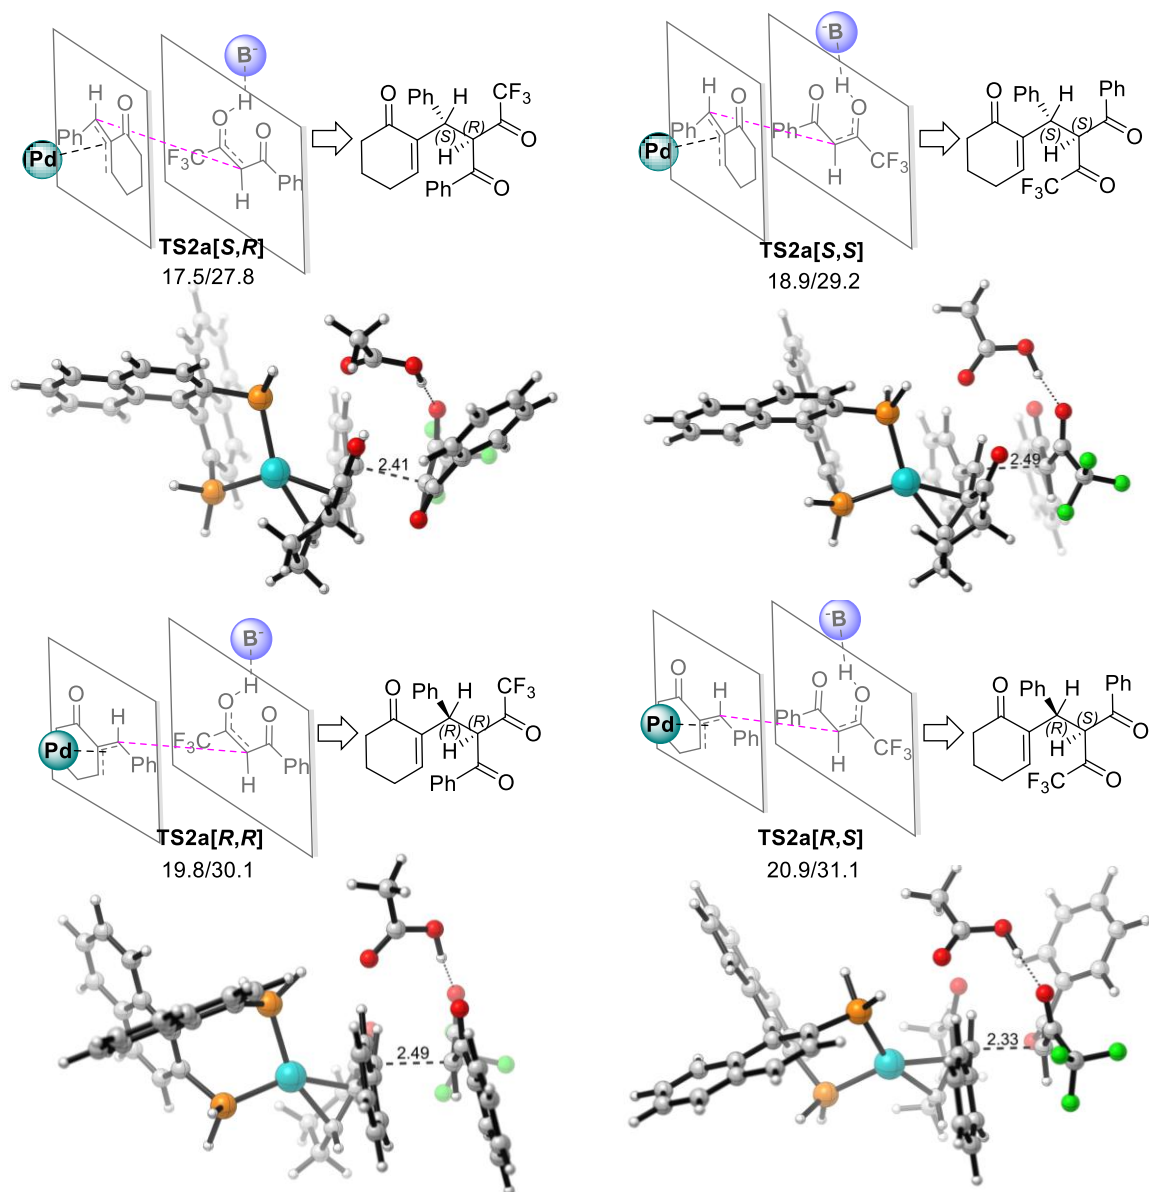

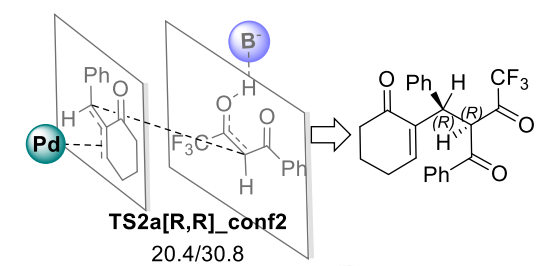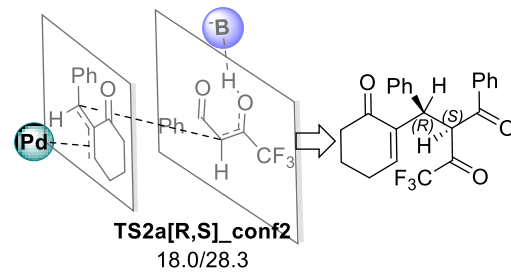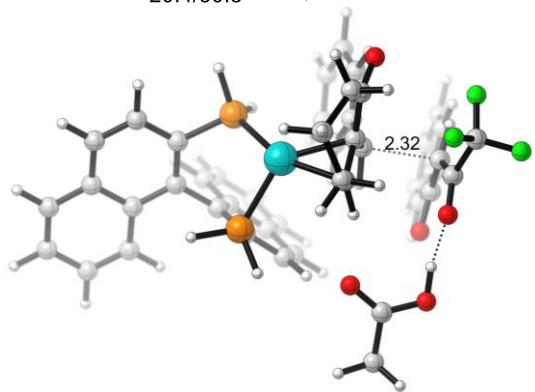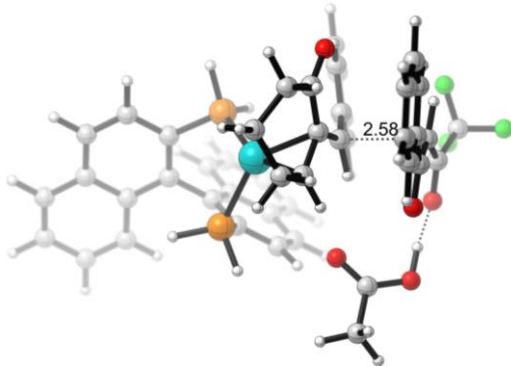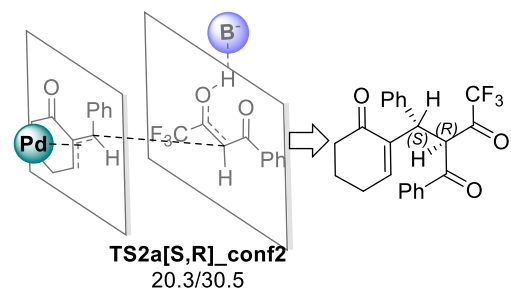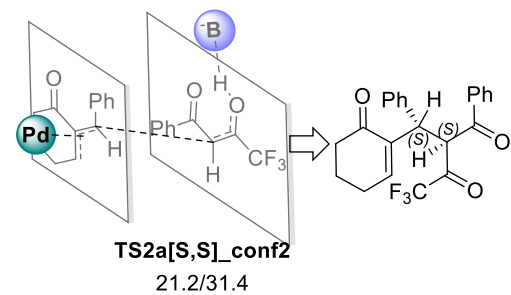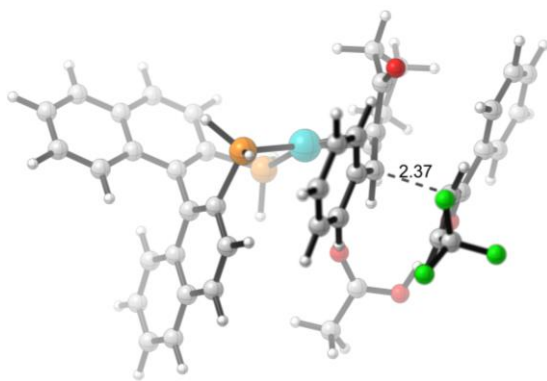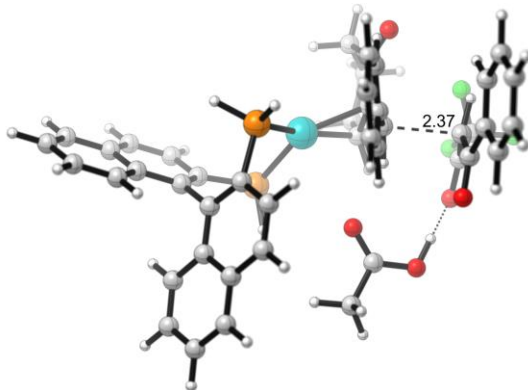

4.3 Potential energy surfaces of the favorable pathways to deliver (**R**)- and (**S**)-**3a** at low (40 °C) and high (140 °C) temperatures.

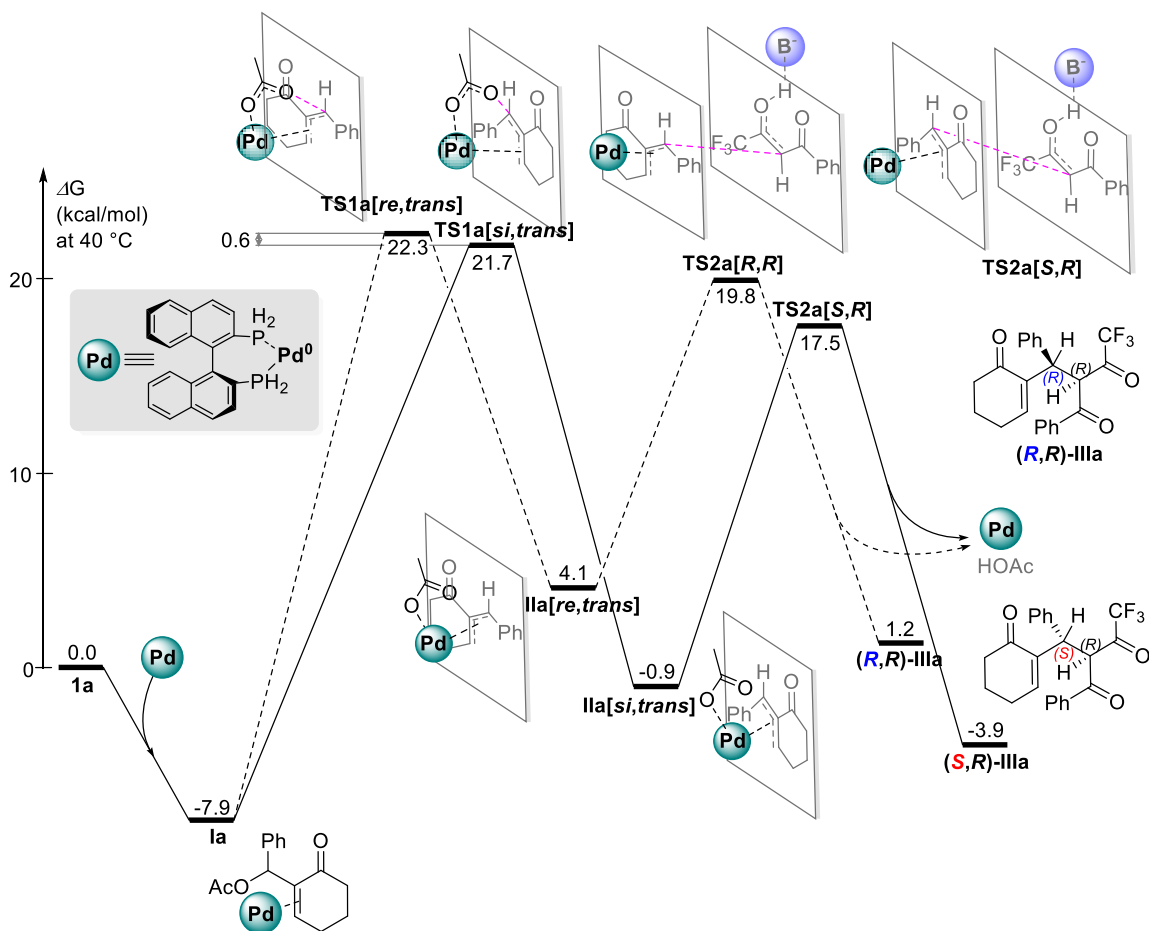

**Figure S5.** Free energy profiles of the favorable pathways to deliver (**R**)- and (**S**)-**3a** at 40 °C.



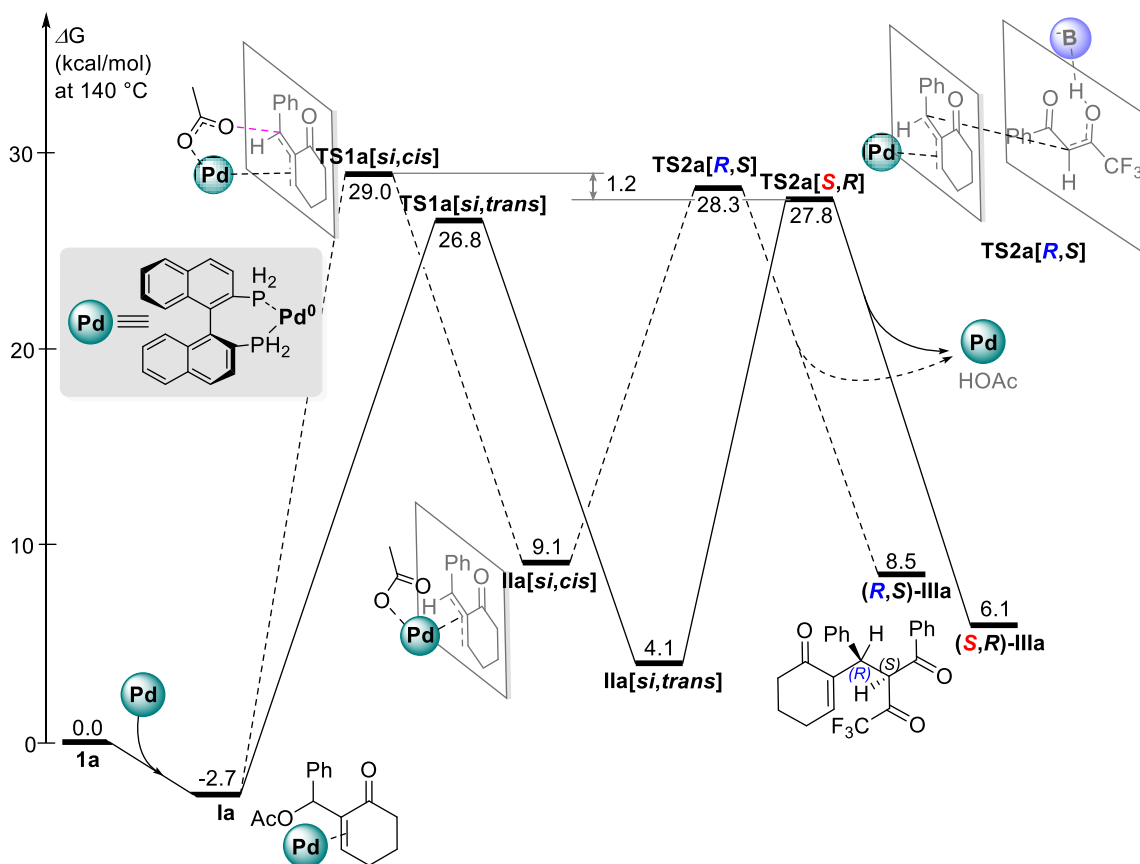

**Figure S6.** Free energy profiles of the favorable pathways to deliver (*R*)- and (*S*)-**3a** at 140 °C.

4.4 Enthalpy and entropy contributions to deliver (*S,R*)-**IIIa** at different temperatures.

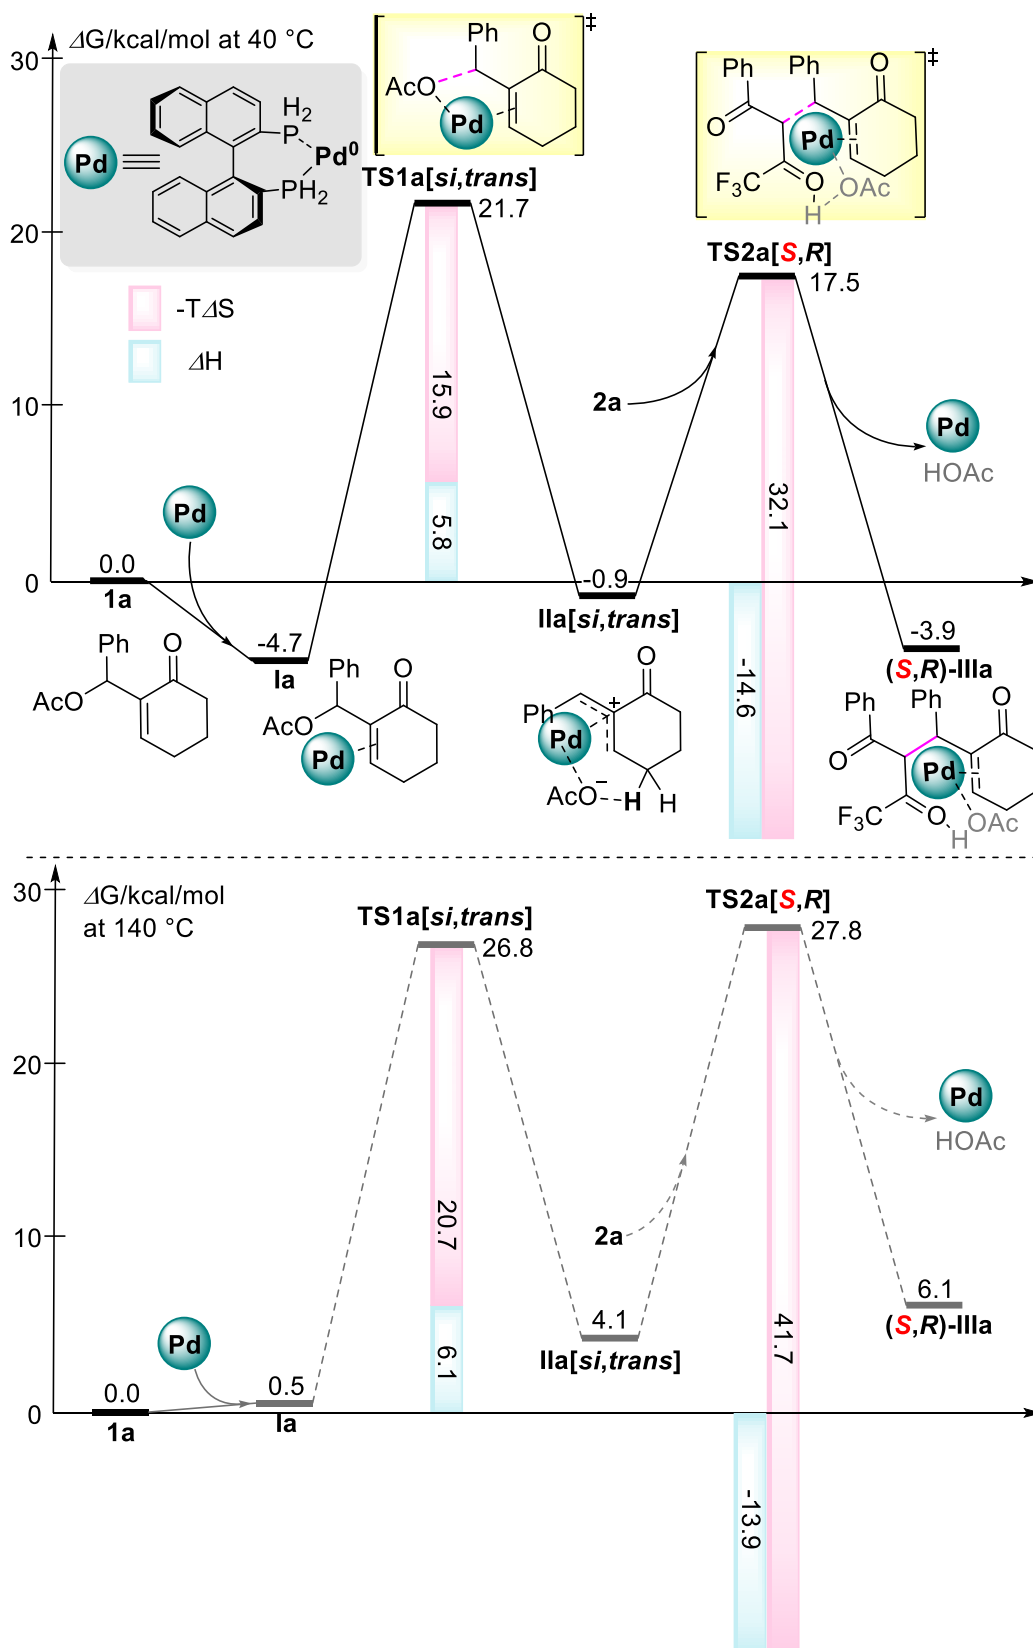

#### 4.5 Tables of energies and other thermodynamic parameters.

| Structure              | $E_{\text{ele}}$ | $E_{\text{ele}}(\text{SP})$ | ZPE     | $H(40\text{ }^{\circ}\text{C})$ | $T \cdot S_{\text{qh}}(40\text{ }^{\circ}\text{C})$ | $H(140\text{ }^{\circ}\text{C})$ | $T \cdot S_{\text{qh}}(140\text{ }^{\circ}\text{C})$ |
|------------------------|------------------|-----------------------------|---------|---------------------------------|-----------------------------------------------------|----------------------------------|------------------------------------------------------|
| <b>HOAc</b>            | -228.92703       | -229.06514                  | 0.06188 | -228.85929                      | 0.03336                                             | -228.85634                       | 0.04690                                              |
| <b>CF3CO2H</b>         | -526.40654       | -526.82604                  | 0.03958 | -526.35929                      | 0.03914                                             | -526.35525                       | 0.05570                                              |
| <b>H2O</b>             | -76.36042        | -76.43036                   | 0.02123 | -76.33521                       | 0.02247                                             | -76.33393                        | 0.03076                                              |
| <b>OAc-</b>            | -228.36796       | -228.54325                  | 0.04805 | -228.31424                      | 0.03304                                             | -228.31152                       | 0.04621                                              |
| <b>1a</b>              | -806.40911       | -806.68380                  | 0.27906 | -806.11094                      | 0.06418                                             | -806.09868                       | 0.09710                                              |
| <b>2a</b>              | -834.69188       | -835.15365                  | 0.15452 | -834.52291                      | 0.05492                                             | -834.51386                       | 0.08175                                              |
| <b>Pd-cat</b>          | -1581.85094      | -1582.14198                 | 0.29361 | -1581.53489                     | 0.07063                                             | -1581.51954                      | 0.10927                                              |
| <b>Ia</b>              | -2388.31949      | -2388.86684                 | 0.57479 | -2387.70292                     | 0.10874                                             | -2387.67478                      | 0.17250                                              |
| <b>TS1a[si,trans]</b>  | -2388.27071      | -2388.81583                 | 0.57151 | -2387.65722                     | 0.10945                                             | -2387.62908                      | 0.17335                                              |
| <b>IIa[si,trans]</b>   | -2388.30938      | -2388.85276                 | 0.57259 | -2387.69419                     | 0.11020                                             | -2387.66581                      | 0.17456                                              |
| <b>TS2a[S,R]</b>       | -3223.01203      | -3224.00497                 | 0.72833 | -3222.22655                     | 0.13856                                             | -3222.18873                      | 0.22168                                              |
| <b>TS2a[S,S]</b>       | -3223.00785      | -3224.00201                 | 0.72787 | -3222.22266                     | 0.13904                                             | -3222.18484                      | 0.22215                                              |
| <b>(S,R)-IIIa</b>      | -3223.04176      | -3224.03996                 | 0.73110 | -3222.25277                     | 0.14126                                             | -3222.21490                      | 0.22495                                              |
| <b>(S,S)-IIIa</b>      | -3223.02607      | -3224.02509                 | 0.73103 | -3222.23748                     | 0.14040                                             | -3222.19960                      | 0.22396                                              |
| <b>TS1a[re,trans]</b>  | -2388.27024      | -2388.81530                 | 0.57169 | -2387.65670                     | 0.10914                                             | -2387.62858                      | 0.17300                                              |
| <b>IIa[re,trans]</b>   | -2388.30171      | -2388.84563                 | 0.57300 | -2387.68647                     | 0.10943                                             | -2387.65811                      | 0.17362                                              |
| <b>TS2a[R,R]</b>       | -3223.00632      | -3223.99986                 | 0.72785 | -3222.22113                     | 0.13960                                             | -3222.18333                      | 0.22282                                              |
| <b>TS2a[R,S]</b>       | -3223.00512      | -3223.99889                 | 0.72834 | -3222.21945                     | 0.13937                                             | -3222.18162                      | 0.22267                                              |
| <b>(R,R)-IIIa</b>      | -3223.03863      | -3224.03380                 | 0.73135 | -3222.24991                     | 0.13890                                             | -3222.21205                      | 0.22201                                              |
| <b>(R,S)-IIIa</b>      | -3223.03089      | -3224.03448                 | 0.73019 | -3222.24277                     | 0.14174                                             | -3222.20483                      | 0.22567                                              |
| <b>TS1a[si,cis]</b>    | -2388.26766      | -2388.81276                 | 0.57206 | -2387.65364                     | 0.10958                                             | -2387.62556                      | 0.17349                                              |
| <b>IIa[si,cis]</b>     | -2388.30011      | -2388.84347                 | 0.57192 | -2387.68547                     | 0.11079                                             | -2387.65703                      | 0.17541                                              |
| <b>TS2a[R,R]_conf2</b> | -3223.01455      | -3224.00064                 | 0.72871 | -3222.22844                     | 0.13891                                             | -3222.19066                      | 0.22187                                              |
| <b>TS2a[R,S]_conf2</b> | -3223.01376      | -3224.00329                 | 0.72799 | -3222.22821                     | 0.13950                                             | -3222.19040                      | 0.22264                                              |
| <b>TS1a[re,cis]</b>    | -2388.26691      | -2388.81103                 | 0.57179 | -2387.65326                     | 0.10897                                             | -2387.62515                      | 0.17265                                              |
| <b>IIa[re,cis]</b>     | -2388.30574      | -2388.84583                 | 0.57240 | -2387.69073                     | 0.11000                                             | -2387.66231                      | 0.17438                                              |
| <b>TS2a[S,R]_conf2</b> | -3223.00939      | -3224.00000                 | 0.72854 | -3222.22323                     | 0.13982                                             | -3222.18545                      | 0.22296                                              |
| <b>TS2a[S,S]_conf2</b> | -3223.00859      | -3223.99820                 | 0.72844 | -3222.22249                     | 0.14009                                             | -3222.18469                      | 0.22332                                              |

Notes:  $E_{\text{ele}}$ , ZPE,  $H(T)$ , and  $T \cdot S_{\text{qh}}$  were the electronic energies, zero-point energies, sum of electronic and thermal enthalpies, and product of temperature and entropies using Grimme's quasiharmonic approximation, respectively, which were given at the B3LYP-D3(BJ)/def2-SVP-SMD(toluene) level.  $E_{\text{ele}}(\text{SP})$  were electronic energies from single point energy calculations at the M06/def2-TZVPP-SMD(toluene) level.

#### 4.6 Coordinates of all stationary points.

##### 1a

|   |           |           |           |
|---|-----------|-----------|-----------|
| C | -3.654039 | 0.986516  | 2.098953  |
| C | -3.951768 | 2.205801  | 1.607506  |
| C | -4.921208 | 3.098834  | 2.302044  |
| C | -5.404701 | 2.638566  | 3.665729  |
| C | -5.562198 | 1.119436  | 3.737611  |
| C | -4.260349 | 0.417230  | 3.347506  |
| H | -2.925504 | 0.373971  | 1.560393  |
| H | -4.647727 | 2.974202  | 4.400378  |
| H | -6.336235 | 3.174891  | 3.896539  |
| H | -5.881389 | 0.810232  | 4.745064  |
| H | -6.360410 | 0.806738  | 3.042189  |
| H | -3.518083 | 0.507433  | 4.165943  |
| H | -4.420665 | -0.666572 | 3.221315  |
| O | -5.278696 | 4.152157  | 1.807697  |
| C | -3.336071 | 2.782736  | 0.355846  |
| H | -4.130276 | 3.202915  | -0.274356 |
| C | -2.334728 | 3.883189  | 0.667121  |
| C | -1.162233 | 3.581889  | 1.372339  |
| C | -2.566312 | 5.197180  | 0.250510  |
| C | -0.230139 | 4.581742  | 1.652986  |
| H | -0.979811 | 2.555884  | 1.700831  |
| C | -1.638127 | 6.200419  | 0.537681  |
| H | -3.480651 | 5.430774  | -0.297021 |
| C | -0.468305 | 5.895344  | 1.237461  |
| H | 0.683426  | 4.337278  | 2.200707  |
| H | -1.828162 | 7.225158  | 0.209457  |
| H | 0.258674  | 6.680478  | 1.459485  |
| O | -2.684133 | 1.715925  | -0.358439 |
| C | -2.508290 | 1.887769  | -1.688254 |
| O | -2.929336 | 2.835538  | -2.299480 |
| C | -1.716492 | 0.747029  | -2.270415 |
| H | -0.690816 | 0.774157  | -1.869056 |
| H | -2.157390 | -0.217505 | -1.977299 |
| H | -1.686267 | 0.836483  | -3.362817 |

##### 2a

|   |           |           |           |
|---|-----------|-----------|-----------|
| C | -3.141149 | 0.870434  | 0.297186  |
| C | -4.489269 | 1.328502  | 0.010039  |
| H | -5.230604 | 0.695469  | -0.465881 |
| C | -4.825518 | 2.606984  | 0.356431  |
| C | -6.209973 | 3.180857  | 0.098361  |
| C | -2.710803 | -0.510219 | -0.054515 |
| C | -3.562891 | -1.441875 | -0.671822 |
| C | -1.390724 | -0.887829 | 0.249324  |
| C | -3.103275 | -2.722481 | -0.977793 |
| H | -4.591072 | -1.176591 | -0.918577 |
| C | -0.933672 | -2.166549 | -0.056936 |
| H | -0.741579 | -0.153868 | 0.728329  |
| C | -1.789502 | -3.086986 | -0.671462 |
| H | -3.773368 | -3.439233 | -1.457462 |
| H | 0.093520  | -2.450420 | 0.182983  |
| H | -1.431614 | -4.090891 | -0.912191 |
| F | -6.784441 | 3.556982  | 1.246653  |
| F | -6.133154 | 4.254173  | -0.696729 |
| F | -7.012047 | 2.284135  | -0.492117 |
| O | -4.016999 | 3.458742  | 0.933309  |
| O | -2.327885 | 1.643888  | 0.847238  |
| H | -3.142485 | 2.939839  | 1.039936  |

##### CF<sub>3</sub>CO<sub>2</sub>H

|   |           |           |           |
|---|-----------|-----------|-----------|
| C | -0.675120 | -2.664337 | -1.022363 |
| C | -1.138878 | -4.136464 | -1.084310 |
| F | -0.385633 | -4.820229 | -1.936136 |
| F | -1.045487 | -4.702746 | 0.124286  |
| F | -2.413327 | -4.204086 | -1.485762 |
| O | -1.433309 | -1.982236 | -0.165858 |
| O | 0.236750  | -2.228142 | -1.663037 |
| H | -1.114269 | -1.062585 | -0.153047 |

|                        |           |           |           |           |           |           |           |
|------------------------|-----------|-----------|-----------|-----------|-----------|-----------|-----------|
| <b>HOAc</b>            |           |           |           | C         | -3.578996 | 4.242348  | -0.363336 |
| O                      | 2.700851  | 5.420926  | 3.120110  | C         | -2.859205 | 3.015859  | -0.307947 |
| C                      | 1.399063  | 5.692645  | 3.348028  | H         | -5.475410 | 5.228421  | -0.195718 |
| O                      | 0.572679  | 4.827255  | 3.490323  | H         | -3.039514 | 5.168061  | -0.578735 |
| C                      | 1.142739  | 7.174753  | 3.396152  | C         | -2.816333 | 0.510124  | 0.010628  |
| H                      | 1.751894  | 7.635144  | 4.189569  | C         | -2.799546 | -0.298571 | -1.174055 |
| H                      | 1.446576  | 7.638910  | 2.444942  | C         | -2.191997 | 0.052390  | 1.169626  |
| H                      | 0.078770  | 7.361184  | 3.582709  | C         | -3.412508 | 0.125078  | -2.387701 |
| H                      | 2.781884  | 4.451837  | 3.103703  | C         | -2.142297 | -1.573847 | -1.152812 |
| <b>H<sub>2</sub>O</b>  |           |           |           | C         | -1.546092 | -1.215746 | 1.174942  |
| O                      | 1.737413  | 0.475795  | 0.000000  | C         | -3.376253 | -0.667357 | -3.515222 |
| H                      | 2.702538  | 0.530255  | 0.000000  | H         | -3.912769 | 1.093527  | -2.416049 |
| H                      | 1.466585  | 1.403740  | 0.000000  | C         | -2.126582 | -2.367271 | -2.331529 |
| <b>OAc<sup>-</sup></b> |           |           |           | C         | -1.524758 | -2.005919 | 0.051013  |
| C                      | -1.602190 | 0.765786  | -0.000635 | H         | -1.057566 | -1.561568 | 2.089344  |
| C                      | -3.176608 | 0.772147  | -0.003043 | C         | -2.729301 | -1.926572 | -3.489753 |
| H                      | -3.549918 | 1.342629  | -0.873411 | H         | -3.850966 | -0.322025 | -4.436723 |
| H                      | -3.600538 | -0.246453 | -0.022330 | H         | -1.623570 | -3.337290 | -2.302466 |
| H                      | -3.548308 | 1.301511  | 0.894072  | H         | -1.027495 | -2.979037 | 0.070971  |
| O                      | -1.081442 | 1.902460  | -0.030313 | H         | -2.709378 | -2.545401 | -4.389843 |
| O                      | -1.061655 | -0.360156 | 0.035948  | P         | -1.014826 | 3.094008  | -0.388039 |
| <b>Pd-cat</b>          |           |           |           | P         | -1.976170 | 1.136699  | 2.650080  |
| C                      | -7.039420 | 0.709606  | 0.728940  | H         | -0.903492 | 4.179531  | -1.311037 |
| C                      | -5.680581 | 0.663185  | 0.500865  | H         | -0.735847 | 2.071196  | -1.336166 |
| C                      | -4.946430 | 1.846681  | 0.203446  | H         | -1.978148 | 0.112244  | 3.646636  |
| C                      | -5.657159 | 3.091794  | 0.146057  | H         | -3.314164 | 1.561288  | 2.879061  |
| C                      | -7.058207 | 3.103815  | 0.382746  | Pd        | -0.517538 | 2.667964  | 1.796483  |
| C                      | -7.738001 | 1.939703  | 0.668594  | <b>la</b> |           |           |           |
| H                      | -7.583019 | -0.210132 | 0.957741  | C         | -5.564866 | 1.693790  | 0.917936  |
| H                      | -5.150331 | -0.288350 | 0.549479  | C         | -4.410062 | 1.253697  | 0.306956  |
| C                      | -3.531252 | 1.826818  | -0.030428 | C         | -3.402299 | 2.172690  | -0.101875 |
| C                      | -4.935378 | 4.279412  | -0.146961 | C         | -3.614217 | 3.570835  | 0.141278  |
| H                      | -7.588507 | 4.058451  | 0.335266  | C         | -4.817795 | 3.990513  | 0.769827  |
| H                      | -8.815118 | 1.962227  | 0.849745  | C         | -5.774441 | 3.074718  | 1.150517  |
|                        |           |           |           | H         | -6.325380 | 0.972164  | 1.225336  |
|                        |           |           |           | H         | -4.256923 | 0.188356  | 0.132001  |

|    |           |           |           |                              |           |           |           |
|----|-----------|-----------|-----------|------------------------------|-----------|-----------|-----------|
| C  | -2.189204 | 1.744464  | -0.736062 | H                            | 5.949646  | -0.133010 | 0.272853  |
| C  | -2.609180 | 4.495600  | -0.249673 | H                            | 3.212015  | -1.020747 | 1.301979  |
| H  | -4.970017 | 5.058126  | 0.947863  | H                            | 4.594418  | -0.458172 | 2.231729  |
| H  | -6.695160 | 3.410256  | 1.633352  | O                            | 4.529044  | 2.160202  | -2.095317 |
| C  | -1.445816 | 4.068995  | -0.845066 | C                            | 3.886873  | 3.500990  | 0.308117  |
| C  | -1.226943 | 2.685415  | -1.098832 | H                            | 3.698141  | 3.963652  | -0.666636 |
| H  | -2.770718 | 5.560566  | -0.063377 | C                            | 5.262318  | 3.893240  | 0.808519  |
| H  | -0.664987 | 4.785464  | -1.104653 | C                            | 5.518246  | 4.097506  | 2.170786  |
| C  | -1.978698 | 0.285194  | -1.002349 | C                            | 6.318373  | 3.997684  | -0.108496 |
| C  | -2.616939 | -0.319820 | -2.136160 | C                            | 6.809145  | 4.401372  | 2.609312  |
| C  | -1.175066 | -0.489360 | -0.168755 | H                            | 4.697695  | 4.029110  | 2.886150  |
| C  | -3.433478 | 0.426861  | -3.031724 | C                            | 7.608588  | 4.296744  | 0.333298  |
| C  | -2.425395 | -1.718438 | -2.392213 | H                            | 6.118050  | 3.829723  | -1.168221 |
| C  | -0.989625 | -1.874285 | -0.437722 | C                            | 7.859205  | 4.499551  | 1.693121  |
| C  | -4.031137 | -0.178064 | -4.116830 | H                            | 6.995131  | 4.563822  | 3.674180  |
| H  | -3.579522 | 1.492031  | -2.850630 | H                            | 8.422935  | 4.377045  | -0.391278 |
| C  | -3.059430 | -2.311402 | -3.517238 | H                            | 8.868833  | 4.737373  | 2.037250  |
| C  | -1.601548 | -2.471645 | -1.513372 | O                            | 2.901244  | 3.973264  | 1.250560  |
| H  | -0.352032 | -2.467989 | 0.222125  | C                            | 1.804591  | 4.589816  | 0.783930  |
| C  | -3.846445 | -1.560088 | -4.362725 | O                            | 1.638286  | 4.902309  | -0.373097 |
| H  | -4.652100 | 0.413188  | -4.793829 | C                            | 0.798491  | 4.799712  | 1.882918  |
| H  | -2.908170 | -3.378002 | -3.701639 | H                            | 0.205408  | 3.875364  | 1.977306  |
| H  | -1.457452 | -3.537520 | -1.706979 | H                            | 1.292548  | 4.984941  | 2.846157  |
| H  | -4.327406 | -2.026941 | -5.225320 | H                            | 0.121900  | 5.623435  | 1.625896  |
| P  | 0.428369  | 2.148879  | -1.694882 | H                            | 0.811517  | 3.278250  | -2.457544 |
| P  | -0.143087 | 0.284125  | 1.141265  | H                            | 0.069231  | 1.286545  | -2.765108 |
| Pd | 1.680897  | 1.335148  | 0.139995  | H                            | -0.099034 | -0.796881 | 2.066827  |
| C  | 3.527192  | 1.131960  | 1.253616  | H                            | -1.103502 | 1.066411  | 1.836888  |
| C  | 3.760544  | 1.989961  | 0.148134  |                              |           |           |           |
| C  | 4.242541  | 1.446457  | -1.142340 |                              |           |           |           |
| C  | 4.393563  | -0.070224 | -1.211230 | <b>TS1a[<i>si,trans</i>]</b> |           |           |           |
| C  | 4.968304  | -0.609095 | 0.100876  | C                            | -4.201545 | -2.511184 | 0.360170  |
| C  | 4.047892  | -0.300635 | 1.285860  | C                            | -3.717665 | -1.224621 | 0.466646  |
| H  | 3.401049  | 1.613567  | 2.227884  | C                            | -2.986796 | -0.810848 | 1.616005  |
| H  | 3.401920  | -0.517472 | -1.406964 | C                            | -2.758989 | -1.765889 | 2.661983  |
| H  | 5.035360  | -0.297719 | -2.074494 | C                            | -3.273878 | -3.082865 | 2.521031  |
| H  | 5.150724  | -1.693368 | 0.027667  | C                            | -3.980772 | -3.450110 | 1.396536  |
|    |           |           |           | H                            | -4.758570 | -2.809874 | -0.530913 |

|    |           |           |           |                             |           |           |           |
|----|-----------|-----------|-----------|-----------------------------|-----------|-----------|-----------|
| H  | -3.890323 | -0.508410 | -0.337098 | H                           | 3.943125  | 5.820507  | 1.992956  |
| C  | -2.465573 | 0.518837  | 1.752262  | H                           | 2.479782  | 6.807072  | 1.896964  |
| C  | -2.006690 | -1.373320 | 3.801570  | H                           | 2.715262  | 5.297886  | 3.987008  |
| H  | -3.093829 | -3.803076 | 3.323080  | H                           | 1.179107  | 5.194664  | 3.139085  |
| H  | -4.369634 | -4.466443 | 1.299886  | O                           | 3.508042  | 3.254941  | -0.624836 |
| C  | -1.501078 | -0.101356 | 3.911575  | C                           | 3.841437  | 1.699329  | 1.678966  |
| C  | -1.742270 | 0.861183  | 2.892507  | H                           | 4.066605  | 1.367581  | 0.665477  |
| H  | -1.815247 | -2.108465 | 4.586808  | C                           | 4.637190  | 1.094521  | 2.743433  |
| H  | -0.879854 | 0.167408  | 4.765829  | C                           | 5.179069  | -0.194606 | 2.542789  |
| C  | -2.682507 | 1.507032  | 0.646935  | C                           | 4.979767  | 1.784991  | 3.922609  |
| C  | -3.943800 | 2.178588  | 0.530073  | C                           | 5.995688  | -0.781927 | 3.501140  |
| C  | -1.667890 | 1.770577  | -0.271925 | H                           | 4.905138  | -0.735611 | 1.637334  |
| C  | -5.007852 | 1.956331  | 1.449080  | C                           | 5.804494  | 1.195903  | 4.880363  |
| C  | -4.147763 | 3.113569  | -0.539018 | H                           | 4.625309  | 2.802480  | 4.076302  |
| C  | -1.882867 | 2.704651  | -1.323275 | C                           | 6.307127  | -0.090825 | 4.678859  |
| C  | -6.208916 | 2.619755  | 1.315261  | H                           | 6.394169  | -1.785446 | 3.334505  |
| H  | -4.860266 | 1.250697  | 2.267311  | H                           | 6.061141  | 1.749090  | 5.786793  |
| C  | -5.399488 | 3.777342  | -0.649868 | H                           | 6.950030  | -0.552704 | 5.432237  |
| C  | -3.088618 | 3.351332  | -1.455836 | O                           | 2.513392  | -0.183502 | 1.480892  |
| H  | -1.076250 | 2.908045  | -2.031892 | C                           | 1.881342  | -0.493901 | 2.544166  |
| C  | -6.410045 | 3.537369  | 0.255701  | O                           | 1.555884  | 0.289500  | 3.457143  |
| H  | -7.013220 | 2.436444  | 2.031553  | C                           | 1.447354  | -1.956816 | 2.649185  |
| H  | -5.545530 | 4.486024  | -1.469028 | H                           | 0.446563  | -2.059469 | 2.197299  |
| H  | -3.245525 | 4.061540  | -2.271583 | H                           | 2.134713  | -2.620750 | 2.106379  |
| H  | -7.367581 | 4.054449  | 0.160106  | H                           | 1.369894  | -2.258750 | 3.703338  |
| P  | -0.886343 | 2.478665  | 3.009831  | H                           | -0.828666 | 2.647626  | 4.416619  |
| P  | 0.029543  | 1.129611  | 0.013289  | H                           | -1.936403 | 3.394494  | 2.734886  |
| Pd | 1.046982  | 2.367989  | 1.773506  | H                           | 0.539503  | 1.133883  | -1.310439 |
| C  | 2.461700  | 3.470270  | 2.880656  | H                           | -0.181593 | -0.262042 | 0.160423  |
| C  | 3.164096  | 2.944482  | 1.728114  |                             |           |           |           |
| C  | 3.101012  | 3.707589  | 0.430969  |                             |           |           |           |
| C  | 2.533712  | 5.120002  | 0.526352  | <b>lla[<i>si,trans</i>]</b> |           |           |           |
| C  | 2.846405  | 5.768490  | 1.874929  | C                           | -4.974297 | 2.294450  | 1.473037  |
| C  | 2.253672  | 4.968651  | 3.039058  | C                           | -3.941473 | 1.949856  | 0.627417  |
| H  | 2.550833  | 2.900886  | 3.807199  | C                           | -3.007727 | 2.925636  | 0.176940  |
| H  | 2.942029  | 5.693216  | -0.318872 | C                           | -3.176167 | 4.282529  | 0.608104  |
| H  | 1.440701  | 5.052907  | 0.378800  | C                           | -4.253334 | 4.604183  | 1.478203  |
|    |           |           |           | C                           | -5.132044 | 3.633262  | 1.907053  |

|    |           |           |           |                  |           |           |           |
|----|-----------|-----------|-----------|------------------|-----------|-----------|-----------|
| H  | -5.677992 | 1.530244  | 1.811164  | H                | 4.446442  | -0.045572 | 3.518080  |
| H  | -3.827005 | 0.916498  | 0.296597  | H                | 3.332675  | -1.534929 | 1.781282  |
| C  | -1.891726 | 2.589548  | -0.656853 | H                | 2.218420  | -0.284599 | 2.358661  |
| C  | -2.249500 | 5.262521  | 0.166951  | H                | 3.831374  | -0.231495 | -0.257136 |
| H  | -4.369907 | 5.640757  | 1.804485  | H                | 2.084891  | -0.388591 | -0.124422 |
| H  | -5.952313 | 3.892299  | 2.580290  | O                | 4.564755  | 2.480548  | 3.383700  |
| C  | -1.213253 | 4.927633  | -0.670271 | C                | 3.205282  | 3.795257  | 1.299429  |
| C  | -1.019715 | 3.584675  | -1.094408 | H                | 3.456574  | 4.285846  | 2.244606  |
| H  | -2.369481 | 6.293841  | 0.507342  | C                | 3.031196  | 4.689382  | 0.136744  |
| H  | -0.507989 | 5.692316  | -0.996108 | C                | 2.218364  | 5.832857  | 0.265185  |
| C  | -1.612233 | 1.154916  | -0.985027 | C                | 3.699972  | 4.472026  | -1.081782 |
| C  | -1.992924 | 0.599992  | -2.247189 | C                | 2.082742  | 6.727762  | -0.794971 |
| C  | -0.955713 | 0.361020  | -0.044571 | H                | 1.672306  | 5.986314  | 1.198480  |
| C  | -2.692908 | 1.360705  | -3.225801 | C                | 3.564111  | 5.372176  | -2.139286 |
| C  | -1.658288 | -0.763486 | -2.545490 | H                | 4.352114  | 3.603530  | -1.188941 |
| C  | -0.641586 | -0.991308 | -0.347523 | C                | 2.755145  | 6.503032  | -2.001646 |
| C  | -3.033768 | 0.805683  | -4.440257 | H                | 1.448008  | 7.610011  | -0.679865 |
| H  | -2.956768 | 2.394387  | -2.997137 | H                | 4.098704  | 5.191873  | -3.075053 |
| C  | -2.024824 | -1.303717 | -3.808489 | H                | 2.651705  | 7.209027  | -2.828945 |
| C  | -0.976987 | -1.534981 | -1.566919 | O                | -0.435239 | 2.546684  | 3.943879  |
| H  | -0.134486 | -1.606386 | 0.399793  | C                | -0.404843 | 3.709591  | 3.527384  |
| C  | -2.695106 | -0.537800 | -4.736980 | O                | 0.273706  | 4.116269  | 2.507453  |
| H  | -3.570804 | 1.403409  | -5.180398 | C                | -1.261097 | 4.781208  | 4.183732  |
| H  | -1.765790 | -2.342240 | -4.029643 | H                | -1.447662 | 4.528848  | 5.236366  |
| H  | -0.730003 | -2.575401 | -1.792618 | H                | -0.798083 | 5.774341  | 4.100499  |
| H  | -2.970694 | -0.964715 | -5.704053 | H                | -2.231816 | 4.812361  | 3.661103  |
| P  | 0.457377  | 3.127776  | -2.110567 | H                | 0.830184  | 4.453044  | -2.464231 |
| P  | -0.427918 | 1.125721  | 1.539740  | H                | -0.221839 | 2.869271  | -3.340806 |
| Pd | 1.360146  | 2.637976  | 1.489576  | H                | -1.652239 | 1.573819  | 2.063147  |
| C  | 2.832377  | 1.568579  | 0.305133  | H                | -0.226919 | -0.030222 | 2.328850  |
| C  | 3.479166  | 2.402343  | 1.266110  |                  |           |           |           |
| C  | 4.138188  | 1.788475  | 2.485331  |                  |           |           |           |
| C  | 4.296364  | 0.279846  | 2.478906  | <b>TS2a[S,R]</b> |           |           |           |
| C  | 3.145441  | -0.449755 | 1.784981  | C                | -4.023709 | 2.076980  | -0.243618 |
| C  | 2.961351  | 0.068678  | 0.360062  | C                | -4.360449 | 0.818688  | 0.351199  |
| H  | 2.594377  | 1.982996  | -0.677856 | C                | -5.744018 | 0.619745  | 0.919445  |
| H  | 5.241325  | 0.073062  | 1.939628  | C                | -6.810296 | 1.598506  | 0.479350  |
|    |           |           |           | C                | -6.294068 | 3.027087  | 0.306016  |



|   |           |           |           |   |           |           |           |
|---|-----------|-----------|-----------|---|-----------|-----------|-----------|
| C | -5.100087 | 3.054006  | -0.644787 | H | -8.348065 | -5.948984 | 1.000939  |
| H | -3.110691 | 2.137058  | -0.835745 | F | -0.738064 | -3.368992 | -0.427359 |
| H | -7.171622 | 1.204100  | -0.486757 | F | -1.997586 | -4.388557 | -1.865092 |
| H | -7.641080 | 1.535621  | 1.196642  | F | -1.470553 | -2.309269 | -2.165922 |
| H | -7.099752 | 3.678140  | -0.068443 | O | -3.198680 | -3.487725 | 0.630886  |
| H | -5.984681 | 3.430818  | 1.287049  | O | -6.003933 | -0.851335 | -1.323321 |
| H | -5.439038 | 2.787562  | -1.665270 | C | 2.021484  | 1.225858  | 6.268546  |
| H | -4.674772 | 4.067893  | -0.715839 | C | 0.898028  | 1.929773  | 5.890972  |
| O | -5.990091 | -0.288692 | 1.694665  | C | 0.722265  | 2.355476  | 4.544275  |
| C | -3.419170 | -0.222732 | 0.619827  | C | 1.743450  | 2.039959  | 3.586835  |
| H | -3.760440 | -0.935906 | 1.366596  | C | 2.890425  | 1.316469  | 4.010999  |
| C | -1.957689 | -0.206484 | 0.422873  | C | 3.028348  | 0.915852  | 5.322224  |
| C | -1.178282 | -0.826745 | 1.422668  | H | 2.136587  | 0.902222  | 7.305511  |
| C | -1.302055 | 0.349732  | -0.692469 | H | 0.125427  | 2.162739  | 6.624545  |
| C | 0.211292  | -0.843059 | 1.330391  | C | -0.444338 | 3.069588  | 4.118037  |
| H | -1.692564 | -1.297919 | 2.261709  | C | 1.572579  | 2.445962  | 2.236921  |
| C | 0.087216  | 0.315911  | -0.786891 | H | 3.661881  | 1.079298  | 3.274185  |
| H | -1.882704 | 0.756953  | -1.519669 | H | 3.912971  | 0.356849  | 5.635473  |
| C | 0.849356  | -0.270647 | 0.228036  | C | 0.440581  | 3.114560  | 1.839294  |
| H | 0.798739  | -1.320009 | 2.117934  | C | -0.576254 | 3.433633  | 2.779967  |
| H | 0.578185  | 0.731711  | -1.669926 | H | 2.348875  | 2.202163  | 1.509170  |
| H | 1.938550  | -0.300062 | 0.147191  | H | 0.311338  | 3.386630  | 0.789616  |
| C | -5.404778 | -1.848370 | -0.911191 | C | -1.512164 | 3.417434  | 5.109048  |
| C | -3.948314 | -1.906895 | -1.014841 | C | -1.339971 | 4.567866  | 5.948074  |
| H | -3.559021 | -1.335502 | -1.856841 | C | -2.671185 | 2.650886  | 5.208282  |
| C | -3.078705 | -2.866780 | -0.435673 | C | -0.179161 | 5.389158  | 5.879733  |
| C | -1.795347 | -3.216879 | -1.227236 | C | -2.370703 | 4.917739  | 6.882905  |
| C | -6.184948 | -3.005800 | -0.360620 | C | -3.685259 | 3.013200  | 6.138693  |
| C | -5.812871 | -4.335156 | -0.609350 | C | -0.044153 | 6.492449  | 6.695067  |
| C | -7.360275 | -2.749057 | 0.360440  | H | 0.608564  | 5.134717  | 5.170058  |
| C | -6.591903 | -5.387746 | -0.129009 | C | -2.197917 | 6.060087  | 7.710647  |
| H | -4.916291 | -4.550998 | -1.191582 | C | -3.538391 | 4.111940  | 6.951700  |
| C | -8.127881 | -3.800989 | 0.856067  | H | -4.590424 | 2.405138  | 6.206412  |
| H | -7.643140 | -1.714858 | 0.550004  | C | -1.060219 | 6.832018  | 7.621117  |
| C | -7.745350 | -5.123396 | 0.613628  | H | 0.854175  | 7.110444  | 6.627865  |
| H | -6.294920 | -6.419238 | -0.333512 | H | -2.987977 | 6.316526  | 8.420849  |
| H | -9.029572 | -3.589873 | 1.436561  | H | -4.322511 | 4.377168  | 7.665189  |

|    |           |           |          |   |           |           |           |
|----|-----------|-----------|----------|---|-----------|-----------|-----------|
| H  | -0.938857 | 7.707883  | 8.262491 | C | -0.494941 | -0.901924 | 0.952411  |
| P  | -2.176276 | 4.055258  | 2.138787 | H | -2.339992 | -0.967060 | 2.083958  |
| P  | -2.999795 | 1.273642  | 4.035208 | C | -0.659132 | 0.039413  | -1.267292 |
| Pd | -3.359543 | 2.093428  | 1.817188 | H | -2.613474 | 0.683325  | -1.881211 |
| H  | -4.020633 | 0.594342  | 4.731311 | C | 0.108840  | -0.543187 | -0.255416 |
| H  | -1.919598 | 0.394993  | 4.274551 | H | 0.093004  | -1.380875 | 1.738458  |
| H  | -2.544825 | 5.052395  | 3.076330 | H | -0.207481 | 0.272030  | -2.233756 |
| H  | -1.744543 | 4.905416  | 1.086689 | H | 1.169483  | -0.745495 | -0.422166 |
| H  | -4.220866 | -3.336655 | 1.877399 | C | -3.896610 | -2.580440 | -0.515751 |
| C  | -4.641052 | -2.311903 | 3.464207 | C | -4.997478 | -1.684501 | -0.816784 |
| C  | -5.769661 | -2.063852 | 4.430158 | H | -5.016012 | -1.182434 | -1.780758 |
| H  | -5.391106 | -1.612808 | 5.357068 | C | -6.257252 | -1.824962 | -0.164790 |
| H  | -6.459969 | -1.360122 | 3.938344 | C | -7.459956 | -1.259468 | -0.964726 |
| H  | -6.320567 | -2.989233 | 4.646191 | C | -2.825681 | -2.770410 | -1.566436 |
| O  | -4.904426 | -3.276617 | 2.612443 | C | -2.940248 | -2.337713 | -2.896977 |
| O  | -3.608263 | -1.655462 | 3.465202 | C | -1.643751 | -3.412341 | -1.167805 |

#### TS2a[S,S]

|   |           |           |           |   |           |           |           |
|---|-----------|-----------|-----------|---|-----------|-----------|-----------|
| C | -4.162707 | 2.562388  | -0.499178 | H | -3.856973 | -1.858785 | -3.242345 |
| C | -4.769685 | 1.410337  | 0.101951  | C | -0.592216 | -3.593216 | -2.063470 |
| C | -6.192945 | 1.503255  | 0.590054  | H | -1.579428 | -3.750333 | -0.133133 |
| C | -7.008614 | 2.690769  | 0.114551  | C | -0.710085 | -3.143786 | -3.382466 |
| C | -6.197017 | 3.976552  | -0.030492 | H | -1.996286 | -2.183522 | -4.832135 |
| C | -4.992241 | 3.743839  | -0.938590 | H | 0.327043  | -4.084116 | -1.733677 |
| H | -3.228544 | 2.430792  | -1.044528 | H | 0.113494  | -3.284200 | -4.087293 |
| H | -7.417262 | 2.390655  | -0.868245 | F | -7.819677 | -2.137164 | -1.923546 |
| H | -7.864451 | 2.799676  | 0.795559  | F | -8.523196 | -1.029785 | -0.206446 |
| H | -6.830365 | 4.785905  | -0.426624 | F | -7.153081 | -0.100221 | -1.607353 |
| H | -5.842018 | 4.302620  | 0.963676  | O | -6.538539 | -2.413531 | 0.881180  |
| H | -5.343407 | 3.560993  | -1.973903 | O | -3.776829 | -3.165272 | 0.561003  |
| H | -4.356174 | 4.641934  | -0.988804 | C | 1.361627  | 0.748242  | 6.345113  |
| O | -6.676680 | 0.642782  | 1.297023  | C | 0.410436  | 1.636258  | 5.890110  |
| C | -4.047327 | 0.224302  | 0.463008  | C | 0.379448  | 2.035745  | 4.524417  |
| H | -4.482876 | -0.362614 | 1.273557  | C | 1.362122  | 1.494895  | 3.629199  |
| C | -2.629975 | -0.035549 | 0.164000  | C | 2.330624  | 0.585130  | 4.132722  |
| C | -1.852419 | -0.667755 | 1.156844  | C | 2.332014  | 0.217512  | 5.460823  |
| C | -2.014309 | 0.286445  | -1.062251 | H | 1.367473  | 0.449744  | 7.395906  |
|   |           |           |           | H | -0.335060 | 2.039812  | 6.576172  |

|    |           |           |          |                   |           |           |           |
|----|-----------|-----------|----------|-------------------|-----------|-----------|-----------|
| C  | -0.609805 | 2.940382  | 4.018804 | O                 | -5.298885 | -3.189744 | 3.027058  |
| C  | 1.330044  | 1.871588  | 2.260101 | O                 | -4.235167 | -1.219853 | 3.220031  |
| H  | 3.074986  | 0.178369  | 3.443665 |                   |           |           |           |
| H  | 3.079930  | -0.485056 | 5.835242 |                   |           |           |           |
| C  | 0.368122  | 2.730572  | 1.787338 | <b>(S,R)-IIIa</b> |           |           |           |
| C  | -0.607829 | 3.274471  | 2.666559 | C                 | -0.767092 | -0.806975 | 0.410312  |
| H  | 2.073214  | 1.452674  | 1.578458 | C                 | -2.147151 | -0.623873 | 0.714283  |
| H  | 0.339399  | 2.981191  | 0.724701 | C                 | -2.706006 | -1.183737 | 1.955886  |
| C  | -1.650555 | 3.502364  | 4.938168 | C                 | -1.707439 | -1.807346 | 2.927768  |
| C  | -1.329206 | 4.630860  | 5.761874 | C                 | -0.673323 | -2.644921 | 2.171955  |
| C  | -2.928943 | 2.949700  | 4.981960 | C                 | 0.108641  | -1.807218 | 1.153701  |
| C  | -0.041203 | 5.236882  | 5.748717 | H                 | -0.467786 | -0.579991 | -0.616890 |
| C  | -2.335743 | 5.181145  | 6.623931 | H                 | -1.208565 | -1.001956 | 3.495575  |
| C  | -3.916998 | 3.508689  | 5.839597 | H                 | -2.283505 | -2.412216 | 3.642692  |
| C  | 0.236522  | 6.324919  | 6.548334 | H                 | 0.017536  | -3.131981 | 2.878903  |
| H  | 0.729508  | 4.828210  | 5.094378 | H                 | -1.201604 | -3.454679 | 1.644137  |
| C  | -2.014635 | 6.301604  | 7.437170 | H                 | 0.941066  | -1.286947 | 1.657145  |
| C  | -3.627680 | 4.590495  | 6.637248 | H                 | 0.584325  | -2.475803 | 0.414978  |
| H  | -4.916439 | 3.067823  | 5.863423 | O                 | -3.911652 | -1.204090 | 2.202442  |
| C  | -0.756739 | 6.862823  | 7.402412 | C                 | -3.082471 | -0.140314 | -0.396274 |
| H  | 1.230983  | 6.776490  | 6.524647 | H                 | -2.434214 | 0.081135  | -1.249570 |
| H  | -2.787374 | 6.712141  | 8.091901 | C                 | -3.845574 | 1.144624  | -0.108870 |
| H  | -4.393179 | 5.008812  | 7.295477 | C                 | -3.371314 | 2.331191  | -0.691636 |
| H  | -0.522063 | 7.724018  | 8.032079 | C                 | -4.999932 | 1.198610  | 0.684274  |
| P  | -2.026382 | 4.170486  | 1.929955 | C                 | -4.034346 | 3.542396  | -0.487418 |
| P  | -3.414036 | 1.616485  | 3.814069 | H                 | -2.480448 | 2.288952  | -1.322069 |
| Pd | -3.570794 | 2.476552  | 1.584975 | C                 | -5.666722 | 2.411698  | 0.884607  |
| H  | -4.534285 | 1.076554  | 4.481283 | H                 | -5.360426 | 0.292152  | 1.168047  |
| H  | -2.460675 | 0.612169  | 4.085685 | C                 | -5.189510 | 3.587376  | 0.299933  |
| H  | -2.230108 | 5.254474  | 2.820202 | H                 | -3.652877 | 4.452597  | -0.956791 |
| H  | -1.389485 | 4.881011  | 0.878444 | H                 | -6.566979 | 2.435247  | 1.503976  |
| H  | -5.634711 | -2.854096 | 2.133405 | H                 | -5.717460 | 4.532282  | 0.452429  |
| C  | -4.488430 | -2.353207 | 3.613054 | C                 | -3.165605 | -2.471512 | -1.315159 |
| C  | -3.842274 | -2.934797 | 4.849461 | C                 | -4.025420 | -1.284272 | -0.863308 |
| H  | -3.410460 | -2.138400 | 5.469115 | H                 | -4.676170 | -1.576680 | -0.035903 |
| H  | -4.564567 | -3.527783 | 5.428601 | C                 | -4.880737 | -0.842859 | -2.034359 |
| H  | -3.037175 | -3.617665 | 4.531024 | C                 | -6.270619 | -1.522716 | -2.083520 |
|    |           |           |          | C                 | -3.095769 | -3.704837 | -0.489577 |

|   |           |           |           |                   |           |           |           |
|---|-----------|-----------|-----------|-------------------|-----------|-----------|-----------|
| C | -3.935189 | -3.947830 | 0.610393  | C                 | -0.160800 | 4.606307  | 7.622365  |
| C | -2.116647 | -4.657625 | -0.832158 | H                 | -0.696954 | 5.325256  | 5.674838  |
| C | -3.788509 | -5.117420 | 1.356992  | C                 | 1.221503  | 2.623023  | 7.723388  |
| H | -4.688065 | -3.223215 | 0.912009  | C                 | 1.935798  | 1.520477  | 5.615741  |
| C | -1.970189 | -5.819278 | -0.082344 | H                 | 2.460699  | 0.657739  | 3.730657  |
| H | -1.474552 | -4.452801 | -1.689526 | C                 | 0.535900  | 3.627554  | 8.371399  |
| C | -2.806893 | -6.050393 | 1.016687  | H                 | -0.706251 | 5.397612  | 8.141883  |
| H | -4.440942 | -5.293874 | 2.214539  | H                 | 1.759423  | 1.861396  | 8.293630  |
| H | -1.201702 | -6.548369 | -0.348684 | H                 | 2.471605  | 0.765005  | 6.195916  |
| H | -2.690533 | -6.960961 | 1.609407  | H                 | 0.526006  | 3.670522  | 9.462928  |
| F | -6.944283 | -1.217849 | -3.182709 | P                 | -2.158907 | 2.596934  | 2.826148  |
| F | -6.113405 | -2.861258 | -2.031033 | P                 | 1.060923  | 2.154271  | 1.669033  |
| F | -6.998858 | -1.157448 | -1.015211 | Pd                | -0.980512 | 1.064932  | 1.461566  |
| O | -4.559955 | -0.061754 | -2.886641 | H                 | 2.342177  | 1.602149  | 1.386374  |
| O | -2.498056 | -2.376368 | -2.336398 | H                 | 1.297598  | 3.447781  | 1.133924  |
| C | 2.339450  | 7.333252  | 3.416817  | H                 | -2.219692 | 2.358517  | 4.225884  |
| C | 1.759852  | 6.100515  | 3.628472  | H                 | -3.522717 | 2.919192  | 2.620912  |
| C | 0.463700  | 5.803756  | 3.119306  | H                 | -2.095601 | -1.159919 | -3.512571 |
| C | -0.225554 | 6.818801  | 2.375455  | C                 | -1.361258 | 0.568051  | -3.863876 |
| C | 0.399307  | 8.080074  | 2.178939  | C                 | -1.257018 | 1.593926  | -4.962382 |
| C | 1.654162  | 8.335123  | 2.687638  | H                 | -0.583722 | 2.405132  | -4.659989 |
| H | 3.335820  | 7.540101  | 3.814438  | H                 | -0.914132 | 1.131408  | -5.899295 |
| H | 2.295404  | 5.334705  | 4.190268  | H                 | -2.262685 | 2.005809  | -5.148110 |
| C | -0.161625 | 4.528225  | 3.318789  | O                 | -1.918354 | -0.559285 | -4.279178 |
| C | -1.515210 | 6.531060  | 1.854661  | O                 | -0.995981 | 0.765884  | -2.719733 |
| H | -0.135897 | 8.846323  | 1.612314  |                   |           |           |           |
| H | 2.124196  | 9.308441  | 2.528980  |                   |           |           |           |
| C | -2.095728 | 5.300379  | 2.048228  | <b>(S,S)-IIIa</b> |           |           |           |
| C | -1.425046 | 4.283597  | 2.783692  | C                 | -3.585068 | -3.796401 | 1.692777  |
| H | -2.043033 | 7.305504  | 1.292251  | C                 | -4.766302 | -3.312504 | 1.067690  |
| H | -3.081378 | 5.089062  | 1.631572  | C                 | -5.933461 | -4.207159 | 0.905902  |
| C | 0.559229  | 3.479555  | 4.109519  | C                 | -5.788534 | -5.615684 | 1.473298  |
| C | 0.543110  | 3.546511  | 5.542528  | C                 | -4.380364 | -6.155137 | 1.217471  |
| C | 1.245297  | 2.446953  | 3.474333  | C                 | -3.315839 | -5.281507 | 1.887902  |
| C | -0.156801 | 4.568351  | 6.244199  | H                 | -2.692005 | -3.170418 | 1.602900  |
| C | 1.242678  | 2.552150  | 6.304400  | H                 | -6.002813 | -5.588670 | 2.557419  |
| C | 1.931802  | 1.465454  | 4.242846  | H                 | -6.563552 | -6.233574 | 0.997865  |
|   |           |           |           | H                 | -4.296175 | -7.197322 | 1.565364  |

|   |           |           |           |    |            |           |           |
|---|-----------|-----------|-----------|----|------------|-----------|-----------|
| H | -4.207145 | -6.156506 | 0.129836  | O  | -2.338491  | -3.217429 | -1.403910 |
| H | -3.248349 | -5.526195 | 2.961931  | C  | -6.182828  | -0.942469 | 10.170017 |
| H | -2.324396 | -5.514252 | 1.463242  | C  | -6.315056  | -1.721200 | 9.040255  |
| O | -6.957371 | -3.858703 | 0.331496  | C  | -6.660228  | -1.140129 | 7.787067  |
| C | -4.711725 | -1.982660 | 0.327702  | C  | -6.864836  | 0.278864  | 7.726279  |
| H | -3.781112 | -1.525148 | 0.688135  | C  | -6.724059  | 1.051573  | 8.910750  |
| C | -5.775278 | -0.946522 | 0.667965  | C  | -6.390817  | 0.456867  | 10.108144 |
| C | -5.424094 | 0.069201  | 1.572576  | H  | -5.915698  | -1.407655 | 11.121777 |
| C | -7.065183 | -0.932782 | 0.120032  | H  | -6.152602  | -2.797939 | 9.096847  |
| C | -6.331128 | 1.069605  | 1.927625  | C  | -6.798975  | -1.924291 | 6.594336  |
| H | -4.420669 | 0.072841  | 2.006283  | C  | -7.203346  | 0.870635  | 6.480188  |
| C | -7.975517 | 0.066830  | 0.475381  | H  | -6.884349  | 2.131223  | 8.853282  |
| H | -7.370782 | -1.721702 | -0.561958 | H  | -6.285064  | 1.061816  | 11.011614 |
| C | -7.616123 | 1.071178  | 1.378354  | C  | -7.324971  | 0.104645  | 5.345289  |
| H | -6.028099 | 1.851034  | 2.628602  | C  | -7.123514  | -1.303298 | 5.389279  |
| H | -8.977504 | 0.056763  | 0.039566  | H  | -7.367137  | 1.950383  | 6.435246  |
| H | -8.330876 | 1.852851  | 1.647513  | H  | -7.577904  | 0.573874  | 4.393233  |
| C | -2.963939 | -2.170368 | -1.402295 | C  | -6.605722  | -3.408386 | 6.669035  |
| C | -4.485648 | -2.125468 | -1.241995 | C  | -7.679153  | -4.228940 | 7.152786  |
| H | -4.858054 | -1.214135 | -1.713167 | C  | -5.407611  | -4.001421 | 6.277712  |
| C | -5.137854 | -3.306682 | -1.926907 | C  | -8.931833  | -3.680167 | 7.547621  |
| C | -6.249545 | -3.008358 | -2.981605 | C  | -7.500740  | -5.650129 | 7.235398  |
| C | -2.237529 | -0.862534 | -1.436947 | C  | -5.246220  | -5.412956 | 6.360583  |
| C | -2.872217 | 0.384074  | -1.302303 | C  | -9.949114  | -4.491860 | 8.002761  |
| C | -0.841568 | -0.904524 | -1.597836 | H  | -9.080991  | -2.602101 | 7.482208  |
| C | -2.123326 | 1.560852  | -1.327305 | C  | -8.568201  | -6.457251 | 7.712830  |
| H | -3.950857 | 0.452520  | -1.161834 | C  | -6.259668  | -6.211998 | 6.831652  |
| C | -0.097321 | 0.271085  | -1.632022 | H  | -4.303292  | -5.863946 | 6.041227  |
| H | -0.364515 | -1.880304 | -1.697055 | C  | -9.767663  | -5.893162 | 8.089727  |
| C | -0.737576 | 1.507611  | -1.495500 | H  | -10.904053 | -4.051035 | 8.298215  |
| H | -2.626717 | 2.523733  | -1.216298 | H  | -8.420507  | -7.538496 | 7.772915  |
| H | 0.986146  | 0.227277  | -1.764836 | H  | -6.123206  | -7.294370 | 6.896098  |
| H | -0.154567 | 2.431484  | -1.520378 | H  | -10.581558 | -6.524487 | 8.453484  |
| F | -6.192081 | -3.889812 | -3.982357 | P  | -7.080304  | -2.243904 | 3.810745  |
| F | -7.462083 | -3.120906 | -2.414754 | P  | -4.110848  | -3.044826 | 5.392537  |
| F | -6.164572 | -1.773320 | -3.494341 | Pd | -4.899941  | -2.953598 | 3.206272  |
| O | -4.852855 | -4.459489 | -1.733487 | H  | -2.951592  | -3.714904 | 5.877552  |

|                       |           |           |           |    |           |           |           |
|-----------------------|-----------|-----------|-----------|----|-----------|-----------|-----------|
| H                     | -3.997186 | -1.884652 | 6.203403  | C  | -2.619647 | -1.766820 | -2.406634 |
| H                     | -8.056128 | -3.247129 | 4.053316  | C  | -0.899688 | -1.669258 | -0.618296 |
| H                     | -7.862840 | -1.396683 | 2.988702  | H  | 0.554807  | -1.429810 | 0.936759  |
| H                     | -2.582026 | -4.381592 | -2.708340 | C  | -3.725519 | -1.230405 | -3.029343 |
| C                     | -3.157425 | -3.901669 | -4.447480 | H  | -5.178833 | 0.387609  | -3.038628 |
| C                     | -3.327671 | -4.451378 | -5.837517 | H  | -2.163749 | -2.686860 | -2.781076 |
| H                     | -3.507108 | -3.632041 | -6.544099 | H  | -0.451230 | -2.588034 | -1.003576 |
| H                     | -2.455410 | -5.048315 | -6.139451 | H  | -4.156955 | -1.723151 | -3.903723 |
| H                     | -4.205936 | -5.117617 | -5.835055 | P  | -0.550540 | 3.409783  | -0.193657 |
| O                     | -2.607028 | -4.775715 | -3.614151 | P  | -0.000676 | 1.090377  | 2.263437  |
| O                     | -3.522019 | -2.788921 | -4.113610 | Pd | 1.214843  | 2.796963  | 1.136996  |
| <b>TS1a[re,trans]</b> |           |           |           | C  | 2.808100  | 4.063581  | 0.570187  |
| C                     | -5.552436 | 0.481614  | 2.863515  | C  | 3.331734  | 3.176435  | 1.585711  |
| C                     | -4.428740 | 0.570014  | 2.069687  | C  | 3.128206  | 3.531667  | 3.035118  |
| C                     | -3.860303 | 1.833908  | 1.744419  | C  | 2.618778  | 4.944731  | 3.300243  |
| C                     | -4.482026 | 3.015970  | 2.268264  | C  | 3.123193  | 5.937006  | 2.252407  |
| C                     | -5.641347 | 2.889681  | 3.080066  | C  | 2.666185  | 5.552776  | 0.842002  |
| C                     | -6.168130 | 1.650419  | 3.372496  | H  | 2.991473  | 3.781818  | -0.467098 |
| H                     | -5.971874 | -0.498349 | 3.102782  | H  | 1.514569  | 4.910017  | 3.295072  |
| H                     | -3.960374 | -0.335315 | 1.683129  | H  | 2.931602  | 5.216906  | 4.318923  |
| C                     | -2.688892 | 1.954406  | 0.923179  | H  | 2.792034  | 6.958517  | 2.498487  |
| C                     | -3.916647 | 4.283325  | 1.963341  | H  | 4.226935  | 5.949063  | 2.284047  |
| H                     | -6.107587 | 3.797288  | 3.471723  | H  | 1.621362  | 5.870004  | 0.686555  |
| H                     | -7.059266 | 1.565997  | 3.998696  | H  | 3.258123  | 6.112135  | 0.095712  |
| C                     | -2.789534 | 4.380860  | 1.184262  | O  | 3.390588  | 2.768634  | 3.949105  |
| C                     | -2.166637 | 3.217457  | 0.650653  | C  | 3.992237  | 1.937593  | 1.353170  |
| H                     | -4.391204 | 5.183813  | 2.361127  | H  | 4.067626  | 1.323747  | 2.251208  |
| H                     | -2.363290 | 5.363572  | 0.967740  | C  | 4.974718  | 1.644954  | 0.311703  |
| C                     | -2.052723 | 0.711695  | 0.377501  | C  | 5.565113  | 0.361114  | 0.290851  |
| C                     | -2.632064 | 0.071061  | -0.767028 | C  | 5.418227  | 2.597225  | -0.625099 |
| C                     | -0.920830 | 0.162281  | 0.976180  | C  | 6.540347  | 0.038111  | -0.644804 |
| C                     | -3.773141 | 0.598509  | -1.435273 | H  | 5.211258  | -0.384742 | 1.002985  |
| C                     | -2.044221 | -1.137485 | -1.269742 | C  | 6.398157  | 2.271673  | -1.562898 |
| C                     | -0.347192 | -1.034981 | 0.467811  | H  | 5.014013  | 3.606923  | -0.603287 |
| C                     | -4.304504 | -0.035222 | -2.538194 | C  | 6.957810  | 0.992948  | -1.580868 |
| H                     | -4.224549 | 1.519529  | -1.064996 | H  | 6.979685  | -0.962123 | -0.649984 |
|                       |           |           |           | H  | 6.730371  | 3.025164  | -2.280674 |

|                      |           |           |           |    |           |           |           |
|----------------------|-----------|-----------|-----------|----|-----------|-----------|-----------|
| H                    | 7.724665  | 0.740160  | -2.317178 | H  | -4.392641 | 1.725630  | -0.543718 |
| O                    | 2.710542  | 0.245368  | 0.681520  | C  | -3.614255 | -1.420626 | -2.702218 |
| C                    | 2.367149  | 0.366187  | -0.549052 | C  | -1.420278 | -1.670869 | -1.565016 |
| O                    | 1.971433  | 1.410361  | -1.088984 | H  | 0.478097  | -1.715244 | -0.564114 |
| C                    | 2.537455  | -0.884537 | -1.407807 | C  | -4.799773 | -0.739112 | -2.870771 |
| H                    | 3.538211  | -0.830742 | -1.870181 | H  | -6.014216 | 0.946283  | -2.226293 |
| H                    | 2.496981  | -1.805402 | -0.809463 | H  | -3.389118 | -2.301307 | -3.309032 |
| H                    | 1.791042  | -0.909807 | -2.213623 | H  | -1.203688 | -2.544572 | -2.184999 |
| H                    | -0.724425 | 4.700886  | -0.764400 | H  | -5.527375 | -1.076560 | -3.612586 |
| H                    | -0.701038 | 2.628551  | -1.363479 | P  | -0.307459 | 3.162254  | -0.518254 |
| H                    | 0.639587  | 0.035311  | 2.956855  | P  | 0.530796  | 0.522639  | 1.312442  |
| H                    | -1.028380 | 1.372417  | 3.202438  | Pd | 1.651134  | 2.450690  | 0.558401  |
| <b>Ila[re,trans]</b> |           |           |           | C  | 2.971035  | 4.236623  | 0.430601  |
| C                    | -4.724655 | 0.295332  | 3.351286  | C  | 2.996475  | 3.655442  | 1.727669  |
| C                    | -3.833138 | 0.395184  | 2.304585  | C  | 2.240947  | 4.290074  | 2.863724  |
| C                    | -3.238634 | 1.643569  | 1.968212  | C  | 1.542142  | 5.603591  | 2.552511  |
| C                    | -3.586151 | 2.797574  | 2.746487  | C  | 2.298116  | 6.425114  | 1.508208  |
| C                    | -4.512704 | 2.660869  | 3.815013  | C  | 2.477247  | 5.647055  | 0.201421  |
| C                    | -5.071684 | 1.437221  | 4.113019  | H  | 3.612210  | 3.812000  | -0.343464 |
| H                    | -5.167164 | -0.672885 | 3.596523  | H  | 0.530703  | 5.351258  | 2.187169  |
| H                    | -3.569448 | -0.489051 | 1.723971  | H  | 1.410675  | 6.144099  | 3.500847  |
| C                    | -2.301737 | 1.774283  | 0.889315  | H  | 1.779122  | 7.377861  | 1.318345  |
| C                    | -2.993315 | 4.048699  | 2.426539  | H  | 3.292265  | 6.685348  | 1.912090  |
| H                    | -4.771502 | 3.546621  | 4.400494  | H  | 1.526950  | 5.632034  | -0.359576 |
| H                    | -5.781025 | 1.343846  | 4.938482  | H  | 3.190468  | 6.170459  | -0.456596 |
| C                    | -2.084808 | 4.153918  | 1.401433  | O  | 2.190400  | 3.775836  | 3.963012  |
| C                    | -1.727851 | 3.015246  | 0.625645  | C  | 3.410871  | 2.294690  | 1.878962  |
| H                    | -3.268048 | 4.929741  | 3.011561  | H  | 3.116410  | 1.851849  | 2.835041  |
| H                    | -1.637066 | 5.123714  | 1.171592  | C  | 4.555007  | 1.636773  | 1.220451  |
| C                    | -1.975063 | 0.583709  | 0.040697  | C  | 4.632018  | 0.232108  | 1.243339  |
| C                    | -2.937642 | 0.157364  | -0.936577 | C  | 5.603758  | 2.351444  | 0.612884  |
| C                    | -0.768008 | -0.102617 | 0.170222  | C  | 5.701958  | -0.435846 | 0.654116  |
| C                    | -4.169391 | 0.841977  | -1.141774 | H  | 3.821269  | -0.338067 | 1.696235  |
| C                    | -2.656151 | -0.994437 | -1.742844 | C  | 6.679055  | 1.682448  | 0.029062  |
| C                    | -0.494326 | -1.233370 | -0.649584 | H  | 5.591185  | 3.441802  | 0.620442  |
| C                    | -5.075752 | 0.405243  | -2.084300 | C  | 6.729759  | 0.286059  | 0.040110  |
|                      |           |           |           | H  | 5.727704  | -1.527715 | 0.664563  |

|                  |           |           |           |   |           |           |           |
|------------------|-----------|-----------|-----------|---|-----------|-----------|-----------|
| H                | 7.485882  | 2.256606  | -0.432909 | H | -4.043464 | -1.803577 | 1.890748  |
| H                | 7.569452  | -0.237483 | -0.423199 | C | -0.660971 | -1.808318 | 1.561752  |
| O                | 2.252498  | -0.461378 | -0.517276 | H | 0.451196  | -0.635911 | 0.126852  |
| C                | 2.756099  | 0.313682  | -1.362592 | H | -2.043210 | -2.909156 | 2.808880  |
| O                | 2.600807  | 1.571446  | -1.398837 | H | 0.222715  | -2.314705 | 1.956686  |
| C                | 3.668421  | -0.274083 | -2.435347 | C | -3.597784 | -2.066042 | -1.847954 |
| H                | 4.699626  | 0.060200  | -2.239674 | C | -4.909123 | -1.520784 | -1.550206 |
| H                | 3.638846  | -1.372029 | -2.428560 | H | -5.525436 | -2.019060 | -0.806497 |
| H                | 3.383914  | 0.108201  | -3.427775 | C | -5.609161 | -0.723543 | -2.502077 |
| H                | -0.457073 | 4.504331  | -0.962096 | C | -7.151465 | -0.731293 | -2.337646 |
| H                | -0.731760 | 2.483487  | -1.685272 | C | -3.149318 | -3.294302 | -1.088229 |
| H                | 1.200762  | -0.637436 | 1.743267  | C | -3.995791 | -4.085362 | -0.295431 |
| H                | -0.280211 | 0.746234  | 2.464278  | C | -1.794328 | -3.645326 | -1.181865 |
|                  |           |           |           | C | -3.494401 | -5.185284 | 0.402820  |
|                  |           |           |           | H | -5.058537 | -3.852224 | -0.223276 |
| <b>TS2a[R,R]</b> |           |           |           | C | -1.289565 | -4.738230 | -0.480991 |
| C                | -5.353600 | 0.623592  | 2.151407  | H | -1.156267 | -3.024314 | -1.811245 |
| C                | -5.204765 | 0.737268  | 0.728155  | C | -2.137955 | -5.510042 | 0.319148  |
| C                | -6.177435 | 1.591699  | -0.045259 | H | -4.166614 | -5.793399 | 1.013407  |
| C                | -7.441908 | 2.025469  | 0.672243  | H | -0.228553 | -4.990503 | -0.554024 |
| C                | -7.249182 | 2.287579  | 2.164521  | H | -1.744481 | -6.367902 | 0.870495  |
| C                | -6.619772 | 1.071953  | 2.840348  | F | -7.738316 | 0.309330  | -2.913123 |
| H                | -4.806356 | -0.161788 | 2.670664  | F | -7.659008 | -1.850132 | -2.893195 |
| H                | -7.846969 | 2.894236  | 0.134354  | F | -7.532925 | -0.749124 | -1.031678 |
| H                | -8.158490 | 1.196261  | 0.525919  | O | -5.181987 | -0.119316 | -3.487987 |
| H                | -6.586898 | 3.161407  | 2.302310  | O | -2.824272 | -1.562096 | -2.662156 |
| H                | -8.213001 | 2.537538  | 2.635541  | C | 1.915886  | 4.997899  | 5.046489  |
| H                | -6.407307 | 1.276575  | 3.901997  | C | 0.733971  | 5.100579  | 4.344540  |
| H                | -7.343542 | 0.232613  | 2.831778  | C | 0.529780  | 4.362079  | 3.144591  |
| O                | -5.976766 | 1.882308  | -1.207419 | C | 1.584084  | 3.505331  | 2.681233  |
| C                | -4.076447 | 0.246447  | -0.009764 | C | 2.791116  | 3.426578  | 3.427423  |
| H                | -3.897844 | 0.737826  | -0.968309 | C | 2.956325  | 4.155505  | 4.584851  |
| C                | -2.943019 | -0.506562 | 0.544306  | H | 2.052551  | 5.571117  | 5.966374  |
| C                | -1.662064 | -0.232808 | 0.020740  | H | -0.061543 | 5.752152  | 4.707576  |
| C                | -3.058556 | -1.494424 | 1.543887  | C | -0.691414 | 4.440475  | 2.397524  |
| C                | -0.534214 | -0.866246 | 0.538435  | C | 1.391874  | 2.760234  | 1.487279  |
| H                | -1.581994 | 0.476901  | -0.802903 | H | 3.588414  | 2.772854  | 3.065071  |
| C                | -1.930037 | -2.132601 | 2.049898  |   |           |           |           |



|    |           |           |           |                  |           |                     |
|----|-----------|-----------|-----------|------------------|-----------|---------------------|
| H  | 3.888593  | 4.085514  | 5.149810  | <b>TS2a[R,S]</b> |           |                     |
| C  | 0.211419  | 2.840059  | 0.787953  | C                | -4.879536 | 0.407143 1.586722   |
| C  | -0.844122 | 3.679809  | 1.239859  | C                | -4.429982 | 0.494732 0.232174   |
| H  | 2.198528  | 2.114717  | 1.131315  | C                | -5.044257 | 1.540270 -0.662485  |
| H  | 0.073081  | 2.255963  | -0.123228 | C                | -6.277491 | 2.250542 -0.136294  |
| C  | -1.781476 | 5.358730  | 2.860952  | C                | -7.086010 | 1.378653 0.818065   |
| C  | -1.679234 | 6.762093  | 2.578602  | C                | -6.232279 | 0.953087 2.013120   |
| C  | -2.890910 | 4.877681  | 3.552435  | H                | -4.516049 | -0.426951 2.186557  |
| C  | -0.578722 | 7.310259  | 1.861267  | H                | -5.927285 | 3.168908 0.372840   |
| C  | -2.717932 | 7.649007  | 3.018537  | H                | -6.862904 | 2.575303 -1.008023  |
| C  | -3.917867 | 5.765964  | 3.977290  | H                | -7.986488 | 1.912152 1.161721   |
| C  | -0.507826 | 8.661729  | 1.599289  | H                | -7.414508 | 0.484593 0.267042   |
| H  | 0.212441  | 6.644817  | 1.515383  | H                | -6.105475 | 1.803953 2.705119   |
| C  | -2.611383 | 9.037419  | 2.735167  | H                | -6.756570 | 0.176274 2.594574   |
| C  | -3.829407 | 7.113295  | 3.722549  | O                | -4.547312 | 1.841928 -1.733347  |
| H  | -4.784522 | 5.370584  | 4.512696  | C                | -3.313685 | -0.210125 -0.323452 |
| C  | -1.530326 | 9.535602  | 2.041391  | H                | -2.924351 | 0.257480 -1.225309  |
| H  | 0.343700  | 9.062950  | 1.045054  | C                | -2.330301 | -1.055868 0.380691  |
| H  | -3.407066 | 9.704283  | 3.076278  | C                | -0.987702 | -0.943856 -0.038093 |
| H  | -4.619190 | 7.789703  | 4.058193  | C                | -2.640048 | -1.968284 1.406515  |
| H  | -1.460096 | 10.604545 | 1.827942  | C                | 0.014873  | -1.681508 0.588245  |
| P  | -2.470366 | 3.542904  | 0.406879  | H                | -0.759421 | -0.273806 -0.868567 |
| P  | -3.179905 | 3.077851  | 3.734844  | C                | -1.634243 | -2.707755 2.025124  |
| Pd | -3.873439 | 2.148214  | 1.733152  | H                | -3.678119 | -2.138317 1.691057  |
| H  | -3.946563 | 3.059795  | 4.930201  | C                | -0.302011 | -2.558529 1.628504  |
| H  | -1.952738 | 2.610972  | 4.270318  | H                | 1.048667  | -1.584789 0.247915  |
| H  | -2.833386 | 4.896134  | 0.193256  | H                | -1.894035 | -3.419075 2.812529  |
| H  | -2.114738 | 3.141998  | -0.902918 | H                | 0.482836  | -3.142894 2.114560  |
| H  | -3.705114 | 0.336485  | -3.918573 | C                | -5.343709 | -1.040650 -2.313135 |
| C  | -2.125479 | 1.408461  | -3.598670 | C                | -4.277004 | -1.829643 -1.691911 |
| C  | -0.834595 | 1.828931  | -4.262202 | H                | -4.632748 | -2.448318 -0.868332 |
| H  | -0.354471 | 2.637842  | -3.696621 | C                | -3.043073 | -2.210606 -2.292083 |
| H  | -0.159174 | 0.957505  | -4.285548 | C                | -2.474456 | -3.599138 -1.909981 |
| H  | -1.009556 | 2.135722  | -5.303244 | C                | -5.321451 | -0.736579 -3.782061 |
| O  | -2.904909 | 0.732632  | -4.394744 | C                | -4.876195 | -1.672539 -4.727118 |
| O  | -2.371364 | 1.671709  | -2.425866 | C                | -5.836073 | 0.490366 -4.225709  |
|    |           |           |           | C                | -4.926820 | -1.378099 -6.089650 |

|   |           |           |           |                   |           |           |           |
|---|-----------|-----------|-----------|-------------------|-----------|-----------|-----------|
| H | -4.499515 | -2.642513 | -4.400206 | C                 | -3.914325 | 6.680623  | 2.180792  |
| C | -5.868386 | 0.791559  | -5.585591 | H                 | -5.029403 | 5.046963  | 2.996894  |
| H | -6.181469 | 1.210372  | -3.485727 | C                 | -1.240405 | 8.955941  | 0.891771  |
| C | -5.412904 | -0.141521 | -6.521425 | H                 | 0.895685  | 8.550923  | 0.850923  |
| H | -4.582516 | -2.117225 | -6.817049 | H                 | -3.380697 | 9.080381  | 1.050770  |
| H | -6.249334 | 1.760045  | -5.919345 | H                 | -4.801469 | 7.290366  | 1.993250  |
| H | -5.439646 | 0.093517  | -7.588592 | H                 | -1.137056 | 9.942203  | 0.433772  |
| F | -2.792643 | -4.470237 | -2.890847 | P                 | -1.159684 | 2.730172  | 0.677064  |
| F | -1.145688 | -3.582816 | -1.797749 | P                 | -3.133965 | 2.891122  | 3.505869  |
| F | -2.977745 | -4.093788 | -0.765404 | Pd                | -3.125591 | 1.678646  | 1.535576  |
| O | -2.346598 | -1.576763 | -3.094521 | H                 | -4.298683 | 3.011162  | 4.310977  |
| O | -6.295583 | -0.657342 | -1.629683 | H                 | -2.179993 | 2.720965  | 4.541870  |
| C | 0.853210  | 5.771348  | 6.136784  | H                 | -1.268395 | 3.928793  | -0.069322 |
| C | 0.073510  | 5.555670  | 5.020519  | H                 | -0.238990 | 2.034594  | -0.128941 |
| C | 0.384211  | 4.512876  | 4.102579  | H                 | -2.404845 | -0.028319 | -3.652431 |
| C | 1.525850  | 3.685439  | 4.368843  | C                 | -2.025083 | 1.814654  | -3.221624 |
| C | 2.309768  | 3.937387  | 5.527194  | C                 | -2.363716 | 3.211326  | -3.668304 |
| C | 1.983409  | 4.957852  | 6.393558  | H                 | -1.688889 | 3.937763  | -3.197460 |
| H | 0.598472  | 6.576742  | 6.829526  | H                 | -2.329536 | 3.297826  | -4.763260 |
| H | -0.794624 | 6.187615  | 4.830785  | H                 | -3.396293 | 3.409395  | -3.340370 |
| C | -0.409672 | 4.259858  | 2.935383  | O                 | -2.496835 | 0.893314  | -4.033995 |
| C | 1.836937  | 2.632259  | 3.467724  | O                 | -1.401234 | 1.573160  | -2.197961 |
| H | 3.178494  | 3.302823  | 5.719529  |                   |           |           |           |
| H | 2.593591  | 5.141437  | 7.280796  | <b>(R,R)-IIIa</b> |           |           |           |
| C | 1.062803  | 2.404139  | 2.355093  | C                 | -4.064946 | 0.494608  | 3.164160  |
| C | -0.068472 | 3.220623  | 2.073204  | C                 | -4.251099 | 0.624050  | 1.761107  |
| H | 2.705127  | 2.000884  | 3.672234  | C                 | -5.592056 | 0.904205  | 1.239497  |
| H | 1.311859  | 1.584114  | 1.677801  | C                 | -6.734916 | 1.010458  | 2.243933  |
| C | -1.618265 | 5.103779  | 2.671607  | C                 | -6.545552 | 0.034946  | 3.403284  |
| C | -1.471547 | 6.399033  | 2.076018  | C                 | -5.226194 | 0.301564  | 4.128814  |
| C | -2.888712 | 4.635473  | 2.997456  | H                 | -3.106337 | 0.103228  | 3.504384  |
| C | -0.199785 | 6.921182  | 1.707976  | H                 | -6.778756 | 2.048540  | 2.619263  |
| C | -2.638259 | 7.197141  | 1.828683  | H                 | -7.666270 | 0.826691  | 1.689340  |
| C | -4.038933 | 5.432726  | 2.743257  | H                 | -7.393059 | 0.097028  | 4.104380  |
| C | -0.088518 | 8.167433  | 1.129435  | H                 | -6.539052 | -0.994056 | 3.002556  |
| H | 0.691215  | 6.318645  | 1.887272  | H                 | -5.336565 | 1.186774  | 4.779378  |
| C | -2.486941 | 8.478986  | 1.234447  | H                 | -4.988009 | -0.535797 | 4.806540  |

|   |           |           |           |    |           |           |           |
|---|-----------|-----------|-----------|----|-----------|-----------|-----------|
| O | -5.843480 | 1.017788  | 0.033685  | C  | 0.257779  | 4.646546  | 1.325651  |
| C | -3.099245 | 0.370980  | 0.767863  | C  | 0.682388  | 3.832639  | 0.222415  |
| H | -2.808198 | 1.322237  | 0.308782  | C  | 2.063688  | 3.536423  | 0.068439  |
| C | -1.860989 | -0.156062 | 1.468677  | C  | 2.993884  | 4.023061  | 0.961250  |
| C | -0.818295 | 0.727101  | 1.772438  | H  | 3.322120  | 5.216460  | 2.750520  |
| C | -1.736869 | -1.497667 | 1.856425  | H  | 0.934980  | 5.764370  | 3.062716  |
| C | 0.324550  | 0.285241  | 2.442618  | C  | -1.138918 | 4.911484  | 1.506271  |
| H | -0.900144 | 1.769188  | 1.467678  | C  | -0.290380 | 3.321634  | -0.676054 |
| C | -0.588953 | -1.947976 | 2.511431  | H  | 2.362843  | 2.900924  | -0.766430 |
| H | -2.542588 | -2.203363 | 1.641763  | H  | 4.052928  | 3.785343  | 0.835894  |
| C | 0.446199  | -1.057278 | 2.807726  | C  | -1.629149 | 3.563407  | -0.477682 |
| H | 1.125990  | 0.994282  | 2.664419  | C  | -2.063318 | 4.351454  | 0.624692  |
| H | -0.499873 | -3.001666 | 2.785344  | H  | 0.035793  | 2.694189  | -1.506026 |
| H | 1.347280  | -1.412350 | 3.312939  | H  | -2.362412 | 3.111610  | -1.147622 |
| C | -2.350530 | -1.151191 | -1.117002 | C  | -1.581312 | 5.825235  | 2.609939  |
| C | -3.564937 | -0.498277 | -0.442033 | C  | -1.531494 | 7.241918  | 2.378912  |
| H | -4.274355 | -1.262987 | -0.115016 | C  | -2.036718 | 5.343819  | 3.835837  |
| C | -4.231953 | 0.410063  | -1.480478 | C  | -1.081758 | 7.791069  | 1.144642  |
| C | -5.354638 | -0.241297 | -2.322600 | C  | -1.953946 | 8.143663  | 3.411707  |
| C | -2.328901 | -2.624589 | -1.312052 | C  | -2.457282 | 6.250964  | 4.849029  |
| C | -3.505068 | -3.389979 | -1.408442 | C  | -1.048761 | 9.154852  | 0.946135  |
| C | -1.076961 | -3.259428 | -1.408674 | H  | -0.763353 | 7.116163  | 0.350043  |
| C | -3.428187 | -4.766809 | -1.616156 | C  | -1.904398 | 9.544081  | 3.175347  |
| H | -4.485446 | -2.918093 | -1.351237 | C  | -2.414408 | 7.608882  | 4.644216  |
| C | -1.009475 | -4.638824 | -1.591194 | H  | -2.816541 | 5.858708  | 5.803413  |
| H | -0.165170 | -2.671300 | -1.289859 | C  | -1.461247 | 10.041986 | 1.969534  |
| C | -2.181782 | -5.393543 | -1.702627 | H  | -0.701531 | 9.555490  | -0.009057 |
| H | -4.345354 | -5.352760 | -1.708815 | H  | -2.227400 | 10.220916 | 3.970383  |
| H | -0.034201 | -5.128259 | -1.642914 | H  | -2.735020 | 8.294932  | 5.432192  |
| H | -2.124948 | -6.474624 | -1.852891 | H  | -1.428292 | 11.120507 | 1.799017  |
| F | -6.156601 | 0.655873  | -2.872550 | P  | -3.852746 | 4.336608  | 1.038987  |
| F | -4.749463 | -0.935925 | -3.316248 | P  | -2.291841 | 3.544323  | 4.105057  |
| F | -6.100676 | -1.127366 | -1.639062 | Pd | -3.834607 | 2.591036  | 2.644975  |
| O | -3.764626 | 1.455121  | -1.858555 | H  | -2.300596 | 3.531608  | 5.527562  |
| O | -1.410615 | -0.444894 | -1.445795 | H  | -0.977623 | 3.034910  | 3.933712  |
| C | 2.578971  | 4.833514  | 2.047034  | H  | -4.138731 | 5.711375  | 1.254506  |
| C | 1.246733  | 5.141650  | 2.223097  | H  | -4.423791 | 4.200621  | -0.253198 |

|   |          |           |           |   |           |           |           |
|---|----------|-----------|-----------|---|-----------|-----------|-----------|
| H | 0.244725 | -0.026688 | -1.232697 | C | -3.383774 | -2.850561 | -1.525957 |
| C | 1.917358 | -0.573835 | -0.485651 | C | -4.085334 | -1.633641 | -0.898383 |
| C | 3.219516 | -0.005931 | 0.018965  | H | -3.367013 | -1.033801 | -0.334153 |
| H | 3.834475 | -0.809115 | 0.441704  | C | -4.707561 | -0.773012 | -1.987756 |
| H | 3.761452 | 0.481330  | -0.807002 | C | -4.097445 | 0.639133  | -2.192685 |
| H | 3.023884 | 0.763686  | 0.780043  | C | -1.936993 | -3.081096 | -1.269673 |
| O | 1.120938 | 0.366137  | -0.995938 | C | -1.055131 | -2.058850 | -0.885912 |
| O | 1.630586 | -1.749842 | -0.443073 | C | -1.446116 | -4.386380 | -1.440077 |

**(R,S)-IIIa**

|   |           |           |           |   |           |           |           |
|---|-----------|-----------|-----------|---|-----------|-----------|-----------|
| C | -3.387308 | -3.035034 | 1.691505  | C | -0.105780 | -4.673245 | -1.194708 |
| C | -4.656192 | -3.162962 | 1.066635  | H | -2.142066 | -5.162795 | -1.760679 |
| C | -5.395709 | -4.449088 | 1.148822  | C | 0.764922  | -3.652058 | -0.799134 |
| C | -4.717485 | -5.568180 | 1.936278  | H | 0.974007  | -1.542515 | -0.370010 |
| C | -3.208762 | -5.568015 | 1.687163  | H | 0.264671  | -5.694050 | -1.313067 |
| C | -2.559439 | -4.246031 | 2.107309  | H | 1.817534  | -3.874472 | -0.608024 |
| H | -2.793736 | -2.149391 | 1.451530  | F | -4.320191 | 1.099627  | -3.419121 |
| H | -4.930709 | -5.425249 | 3.010697  | F | -4.686148 | 1.476784  | -1.316777 |
| H | -5.189863 | -6.512742 | 1.630039  | F | -2.778576 | 0.678350  | -1.948026 |
| H | -2.728229 | -6.412602 | 2.206851  | O | -5.683894 | -1.080229 | -2.616776 |
| H | -3.035071 | -5.722907 | 0.608901  | O | -4.043008 | -3.657452 | -2.161435 |
| H | -2.384039 | -4.243841 | 3.196021  | C | -6.335027 | -0.050297 | 9.932653  |
| H | -1.562417 | -4.162219 | 1.642055  | C | -6.264288 | -0.988551 | 8.925103  |
| O | -6.480957 | -4.618301 | 0.611211  | C | -6.861199 | -0.745511 | 7.655599  |
| C | -5.204550 | -2.165308 | 0.040874  | C | -7.536111 | 0.503327  | 7.446639  |
| H | -5.881411 | -2.746209 | -0.596804 | C | -7.593446 | 1.446861  | 8.507861  |
| C | -6.014121 | -1.029044 | 0.640012  | C | -7.007216 | 1.178657  | 9.725676  |
| C | -7.399059 | -0.984147 | 0.441096  | H | -5.869276 | -0.255608 | 10.899363 |
| C | -5.411816 | -0.019706 | 1.409567  | H | -5.744240 | -1.932120 | 9.092991  |
| C | -8.168975 | 0.040033  | 1.000202  | C | -6.799142 | -1.700463 | 6.587197  |
| H | -7.871662 | -1.767983 | -0.153811 | C | -8.126264 | 0.760977  | 6.180497  |
| C | -6.178029 | 1.000773  | 1.974208  | H | -8.112022 | 2.393966  | 8.338459  |
| H | -4.331878 | -0.024461 | 1.570403  | H | -7.057800 | 1.912425  | 10.533415 |
| C | -7.560955 | 1.034788  | 1.769463  | C | -8.050325 | -0.162698 | 5.165699  |
| H | -9.248322 | 0.061483  | 0.829906  | C | -7.386997 | -1.406476 | 5.358388  |
| H | -5.693257 | 1.775070  | 2.573254  | H | -8.642977 | 1.710956  | 6.021710  |
| H | -8.159193 | 1.840861  | 2.201257  | H | -8.493960 | 0.057328  | 4.193633  |



|                    |           |           |           |    |           |           |           |
|--------------------|-----------|-----------|-----------|----|-----------|-----------|-----------|
| H                  | 0.609974  | 3.342166  | 2.661580  | C  | -3.695574 | 4.178970  | 0.185740  |
| H                  | 2.454152  | 7.363312  | 0.431557  | C  | -4.994838 | 4.464772  | 0.684082  |
| H                  | 0.934539  | 6.565021  | -0.004630 | C  | -5.853404 | 3.449355  | 1.046540  |
| H                  | 2.110153  | 6.637326  | 2.836127  | H  | -6.127544 | 1.299160  | 1.219757  |
| H                  | 0.763957  | 7.645068  | 2.286425  | H  | -3.883434 | 0.745573  | 0.356789  |
| H                  | 0.101581  | 5.482001  | 3.544263  | C  | -1.967102 | 2.520886  | -0.440857 |
| H                  | -0.685806 | 5.733337  | 1.991396  | C  | -2.786652 | 5.210145  | -0.176151 |
| O                  | 3.461217  | 5.236772  | -0.336395 | H  | -5.300451 | 5.509821  | 0.778964  |
| C                  | 2.740007  | 2.800636  | 1.414049  | H  | -6.849297 | 3.682702  | 1.430181  |
| H                  | 2.215570  | 2.179151  | 2.139665  | C  | -1.532308 | 4.912159  | -0.649080 |
| C                  | 4.070722  | 2.291398  | 1.123610  | C  | -1.115178 | 3.560376  | -0.800232 |
| C                  | 4.425297  | 1.107736  | 1.816572  | H  | -3.098534 | 6.251665  | -0.065149 |
| C                  | 5.013909  | 2.856872  | 0.241891  | H  | -0.837942 | 5.715759  | -0.897596 |
| C                  | 5.677063  | 0.527907  | 1.658162  | C  | -1.513604 | 1.094414  | -0.505887 |
| H                  | 3.689368  | 0.645047  | 2.478284  | C  | -1.886124 | 0.272553  | -1.618782 |
| C                  | 6.267970  | 2.267707  | 0.083619  | C  | -0.754236 | 0.556142  | 0.532759  |
| H                  | 4.740250  | 3.753755  | -0.308369 | C  | -2.644889 | 0.780181  | -2.710516 |
| C                  | 6.606782  | 1.109907  | 0.787775  | C  | -1.480173 | -1.103431 | -1.646544 |
| H                  | 5.930687  | -0.383031 | 2.205276  | C  | -0.366972 | -0.812301 | 0.495312  |
| H                  | 6.988185  | 2.717756  | -0.603974 | C  | -2.984272 | -0.030292 | -3.772808 |
| H                  | 7.591658  | 0.654658  | 0.655159  | H  | -2.953592 | 1.826197  | -2.695962 |
| O                  | 1.791182  | 1.200352  | 0.087444  | C  | -1.850136 | -1.911767 | -2.755288 |
| C                  | 1.049292  | 0.429722  | 0.789217  | C  | -0.723628 | -1.618883 | -0.559718 |
| O                  | 0.482721  | 0.734501  | 1.853849  | H  | 0.209528  | -1.229131 | 1.324550  |
| C                  | 0.887001  | -0.981067 | 0.218683  | C  | -2.585770 | -1.389041 | -3.796809 |
| H                  | 0.360454  | -0.933446 | -0.747381 | H  | -3.565310 | 0.377134  | -4.603416 |
| H                  | 1.879975  | -1.415407 | 0.023622  | H  | -1.538631 | -2.959327 | -2.767377 |
| H                  | 0.322407  | -1.623756 | 0.907066  | H  | -0.429088 | -2.671268 | -0.573037 |
| H                  | -2.447573 | 2.855258  | 1.725336  | H  | -2.863092 | -2.020454 | -4.644032 |
| H                  | -2.951945 | 3.945434  | -0.058481 | P  | 0.625618  | 3.204914  | -1.267209 |
| H                  | 1.147304  | 3.133811  | -3.208135 | P  | -0.067108 | 1.662083  | 1.827028  |
| H                  | 0.245410  | 1.365871  | -2.381853 | Pd | 1.846308  | 2.830018  | 1.047217  |
|                    |           |           |           | C  | 3.362529  | 1.345218  | 0.793091  |
| <b>lla[si,cis]</b> |           |           |           | C  | 3.931382  | 2.497590  | 1.442364  |
| C                  | -5.444274 | 2.099649  | 0.926583  | C  | 4.432980  | 2.403797  | 2.854937  |
| C                  | -4.190587 | 1.788178  | 0.444055  | C  | 4.345309  | 1.034795  | 3.515976  |
| C                  | -3.281663 | 2.811995  | 0.055169  | C  | 3.210288  | 0.152397  | 3.005105  |

|                        |           |           |           |   |           |           |           |
|------------------------|-----------|-----------|-----------|---|-----------|-----------|-----------|
| C                      | 3.291062  | 0.009637  | 1.487262  | C | -6.501973 | 0.480979  | 0.905542  |
| H                      | 3.461702  | 1.292510  | -0.297214 | C | -7.482096 | 1.571435  | 0.486436  |
| H                      | 5.317714  | 0.542787  | 3.320589  | C | -6.880842 | 2.945015  | 0.204671  |
| H                      | 4.296231  | 1.203199  | 4.601407  | C | -5.673239 | 2.810339  | -0.719697 |
| H                      | 3.250074  | -0.836635 | 3.488114  | H | -3.706008 | 1.805737  | -0.689093 |
| H                      | 2.249218  | 0.609988  | 3.285612  | H | -7.958801 | 1.178040  | -0.428579 |
| H                      | 4.195617  | -0.572789 | 1.221608  | H | -8.271398 | 1.603324  | 1.252675  |
| H                      | 2.441874  | -0.566648 | 1.088096  | H | -7.643054 | 3.608565  | -0.233721 |
| O                      | 4.976716  | 3.329573  | 3.419895  | H | -6.556747 | 3.415301  | 1.151761  |
| C                      | 3.847088  | 3.689217  | 0.655927  | H | -5.990410 | 2.426009  | -1.707990 |
| H                      | 3.940971  | 3.517598  | -0.421818 | H | -5.195812 | 3.785237  | -0.904362 |
| C                      | 4.032787  | 5.097073  | 1.029146  | O | -6.938556 | -0.547240 | 1.397189  |
| C                      | 4.527791  | 5.976083  | 0.047643  | C | -3.977637 | -0.223947 | 0.904667  |
| C                      | 3.660339  | 5.632824  | 2.277835  | H | -3.042706 | 0.131288  | 0.468357  |
| C                      | 4.686517  | 7.337075  | 0.309461  | C | -3.740326 | -1.094078 | 2.068442  |
| H                      | 4.796340  | 5.579796  | -0.935524 | C | -2.397908 | -1.180787 | 2.497767  |
| C                      | 3.813044  | 6.991152  | 2.535822  | C | -4.718538 | -1.806667 | 2.787845  |
| H                      | 3.237933  | 4.984381  | 3.041558  | C | -2.042819 | -1.922657 | 3.620541  |
| C                      | 4.331131  | 7.849270  | 1.558404  | H | -1.631740 | -0.635227 | 1.950115  |
| H                      | 5.082789  | 7.998188  | -0.465069 | C | -4.356242 | -2.559158 | 3.905324  |
| H                      | 3.517961  | 7.387884  | 3.510138  | H | -5.752318 | -1.754562 | 2.454168  |
| H                      | 4.448205  | 8.915189  | 1.769144  | C | -3.024906 | -2.618836 | 4.329598  |
| O                      | 0.427450  | 3.916714  | 3.523507  | H | -0.998661 | -1.957909 | 3.933875  |
| C                      | 0.404056  | 4.803368  | 2.662011  | H | -5.127417 | -3.108110 | 4.451418  |
| O                      | 0.848449  | 4.682721  | 1.457638  | H | -2.752647 | -3.209635 | 5.207505  |
| C                      | -0.193743 | 6.168546  | 2.966455  | C | -2.377682 | -1.964452 | -0.651889 |
| H                      | -0.506526 | 6.231967  | 4.016824  | C | -3.828544 | -1.824575 | -0.762561 |
| H                      | 0.542376  | 6.955512  | 2.741307  | H | -4.462448 | -2.587871 | -0.322854 |
| H                      | -1.063129 | 6.338931  | 2.311091  | C | -4.429188 | -1.054701 | -1.799748 |
| H                      | 0.919798  | 4.410730  | -1.957876 | C | -5.929795 | -1.321657 | -2.087067 |
| H                      | 0.420013  | 2.399683  | -2.425692 | C | -1.828855 | -3.102890 | 0.168924  |
| H                      | -1.184913 | 2.441568  | 2.175444  | C | -0.437142 | -3.139161 | 0.360379  |
| H                      | -0.018521 | 0.786028  | 2.938053  | C | -2.622701 | -4.067280 | 0.808453  |
|                        |           |           |           | C | 0.145088  | -4.097460 | 1.184956  |
|                        |           |           |           | H | 0.161985  | -2.381833 | -0.146921 |
|                        |           |           |           | C | -2.041039 | -5.026351 | 1.638318  |
|                        |           |           |           | H | -3.704939 | -4.066721 | 0.686285  |
| <b>TS2a[R,R]_conf2</b> |           |           |           |   |           |           |           |
| C                      | -4.658877 | 1.855377  | -0.155498 |   |           |           |           |
| C                      | -5.060303 | 0.699047  | 0.602720  |   |           |           |           |

|   |           |           |           |                        |           |           |           |
|---|-----------|-----------|-----------|------------------------|-----------|-----------|-----------|
| C | -0.658443 | -5.041418 | 1.834113  | H                      | 2.319619  | 5.708610  | 5.277902  |
| H | 1.228464  | -4.109966 | 1.329115  | H                      | -1.123138 | 6.750476  | 7.658845  |
| H | -2.674166 | -5.759746 | 2.142622  | H                      | -3.217202 | 5.458882  | 7.426712  |
| H | -0.206292 | -5.789305 | 2.490226  | H                      | 1.235657  | 7.157008  | 7.001908  |
| F | -6.623613 | -0.166450 | -2.065000 | P                      | -2.352669 | 3.710971  | 1.746837  |
| F | -6.069683 | -1.850470 | -3.310070 | P                      | -3.883644 | 1.726057  | 4.226235  |
| F | -6.514549 | -2.154122 | -1.214058 | Pd                     | -4.155720 | 2.216186  | 1.907252  |
| O | -3.938212 | -0.174965 | -2.510906 | H                      | -4.957532 | 1.619804  | 5.148913  |
| O | -1.596470 | -1.148027 | -1.139232 | H                      | -3.230454 | 0.506973  | 4.536028  |
| C | 0.946396  | -0.184467 | 5.844866  | H                      | -2.116122 | 4.877431  | 2.521451  |
| C | 0.152498  | 0.881395  | 5.477541  | H                      | -1.809988 | 4.136837  | 0.510938  |
| C | -0.014019 | 1.231533  | 4.108089  | H                      | -2.424591 | 0.442578  | -2.789533 |
| C | 0.672937  | 0.454798  | 3.115872  | C                      | -1.179665 | 1.863352  | -2.445545 |
| C | 1.487474  | -0.633782 | 3.528800  | C                      | 0.142808  | 2.412904  | -2.922666 |
| C | 1.622089  | -0.950236 | 4.863706  | H                      | 0.326917  | 3.401845  | -2.484594 |
| H | 1.054417  | -0.442499 | 6.900883  | H                      | 0.941775  | 1.723748  | -2.601779 |
| H | -0.367548 | 1.463905  | 6.238995  | H                      | 0.175350  | 2.462248  | -4.020385 |
| C | -0.862498 | 2.311385  | 3.695218  | O                      | -1.621671 | 0.884887  | -3.195059 |
| C | 0.491594  | 0.775561  | 1.744099  | O                      | -1.746177 | 2.286508  | -1.446238 |
| H | 1.996410  | -1.224534 | 2.763429  |                        |           |           |           |
| H | 2.246473  | -1.793233 | 5.168330  |                        |           |           |           |
| C | -0.352050 | 1.790245  | 1.360259  | <b>TS2a[R,S]_conf2</b> |           |           |           |
| C | -1.036819 | 2.567390  | 2.336226  | C                      | -4.646104 | 1.163740  | -0.237691 |
| H | 1.005324  | 0.179622  | 0.986385  | C                      | -4.807960 | -0.017649 | 0.578076  |
| H | -0.534383 | 1.989211  | 0.303442  | C                      | -6.164634 | -0.413903 | 1.056944  |
| C | -1.526095 | 3.167829  | 4.730919  | C                      | -7.325070 | 0.471151  | 0.628950  |
| C | -0.770874 | 4.229488  | 5.332767  | C                      | -6.964041 | 1.924206  | 0.335781  |
| C | -2.850229 | 2.960551  | 5.111240  | C                      | -5.826670 | 1.980701  | -0.680559 |
| C | 0.582413  | 4.491760  | 4.976639  | H                      | -3.759255 | 1.200989  | -0.873338 |
| C | -1.391851 | 5.067244  | 6.318196  | H                      | -7.725721 | -0.002213 | -0.286043 |
| C | -3.453544 | 3.801531  | 6.087614  | H                      | -8.106798 | 0.370460  | 1.396066  |
| C | 1.282262  | 5.522899  | 5.565732  | H                      | -7.848183 | 2.466482  | -0.034406 |
| H | 1.063067  | 3.864716  | 4.225424  | H                      | -6.647858 | 2.429108  | 1.267479  |
| C | -0.640541 | 6.119644  | 6.908140  | H                      | -6.176184 | 1.579255  | -1.650852 |
| C | -2.744573 | 4.822346  | 6.674575  | H                      | -5.506326 | 3.016966  | -0.872437 |
| H | -4.493558 | 3.629487  | 6.374293  | O                      | -6.383506 | -1.429668 | 1.696598  |
| C | 0.668414  | 6.344578  | 6.542022  | C                      | -3.565582 | -0.703581 | 0.828705  |
|   |           |           |           | H                      | -2.765238 | -0.338294 | 0.178322  |



|   |           |           |           |    |           |           |           |
|---|-----------|-----------|-----------|----|-----------|-----------|-----------|
| C | -3.049504 | -1.481633 | 1.953931  | C  | 2.286276  | 0.117217  | 5.394035  |
| C | -1.644421 | -1.440041 | 2.110405  | H  | 1.498277  | 0.732138  | 7.325502  |
| C | -3.815596 | -2.167311 | 2.919187  | H  | -0.268554 | 2.165324  | 6.369025  |
| C | -1.028409 | -2.033975 | 3.207645  | C  | -0.783212 | 2.553174  | 3.718141  |
| H | -1.043216 | -0.920831 | 1.363925  | C  | 0.994761  | 1.141170  | 2.036469  |
| C | -3.189584 | -2.767983 | 4.008547  | H  | 2.846898  | -0.316498 | 3.363667  |
| H | -4.893835 | -2.219764 | 2.787737  | H  | 3.064926  | -0.513462 | 5.829096  |
| C | -1.800089 | -2.699764 | 4.163502  | C  | -0.016454 | 1.895596  | 1.492195  |
| H | 0.055855  | -1.975537 | 3.316494  | C  | -0.916913 | 2.608392  | 2.332036  |
| H | -3.794072 | -3.300306 | 4.746909  | H  | 1.675263  | 0.589429  | 1.383123  |
| H | -1.319698 | -3.168887 | 5.025470  | H  | -0.168950 | 1.916674  | 0.413396  |
| C | -4.159089 | -1.653531 | -1.909862 | C  | -1.728200 | 3.290982  | 4.615518  |
| C | -3.575702 | -2.565229 | -0.951437 | C  | -1.351686 | 4.566035  | 5.149699  |
| H | -4.215967 | -3.295779 | -0.465988 | C  | -2.967229 | 2.742966  | 4.938018  |
| C | -2.185485 | -2.773390 | -0.808071 | C  | -0.099207 | 5.171573  | 4.848937  |
| C | -1.780694 | -4.060238 | -0.042653 | C  | -2.263271 | 5.265631  | 6.009254  |
| C | -5.660351 | -1.695009 | -2.104229 | C  | -3.863142 | 3.447188  | 5.788872  |
| C | -6.203633 | -0.830362 | -3.069713 | C  | 0.233726  | 6.402593  | 5.372151  |
| C | -6.532294 | -2.513769 | -1.370096 | H  | 0.597676  | 4.646623  | 4.194672  |
| C | -7.577489 | -0.781409 | -3.296209 | C  | -1.886645 | 6.531835  | 6.533535  |
| H | -5.508197 | -0.203529 | -3.629874 | C  | -3.518161 | 4.671749  | 6.310768  |
| C | -7.910560 | -2.463145 | -1.591424 | H  | -4.833656 | 3.007423  | 6.030616  |
| H | -6.151713 | -3.177386 | -0.595477 | C  | -0.665664 | 7.089937  | 6.223302  |
| C | -8.437775 | -1.598718 | -2.553880 | H  | 1.199195  | 6.852698  | 5.129944  |
| H | -7.983019 | -0.104730 | -4.052670 | H  | -2.586268 | 7.057040  | 7.188557  |
| H | -8.574854 | -3.096643 | -0.999365 | H  | -4.210138 | 5.203761  | 6.968307  |
| H | -9.516458 | -1.560797 | -2.725168 | H  | -0.387708 | 8.064026  | 6.632141  |
| F | -1.662471 | -5.083046 | -0.910694 | P  | -2.403310 | 3.363101  | 1.553883  |
| F | -0.604017 | -3.918225 | 0.574290  | P  | -3.529342 | 1.218241  | 4.088091  |
| F | -2.683021 | -4.432272 | 0.886183  | Pd | -3.947730 | 1.596855  | 1.751517  |
| O | -1.228308 | -2.097009 | -1.217159 | H  | -4.541195 | 0.785680  | 4.983752  |
| O | -3.510129 | -0.826059 | -2.553023 | H  | -2.528567 | 0.275186  | 4.426594  |
| C | 1.398757  | 0.823879  | 6.241477  | H  | -2.478253 | 4.625569  | 2.198490  |
| C | 0.411524  | 1.625479  | 5.709176  | H  | -1.884400 | 3.777172  | 0.304463  |
| C | 0.256162  | 1.755237  | 4.300091  | H  | -1.086240 | -0.807409 | -2.139790 |
| C | 1.155851  | 1.037723  | 3.443545  | C  | -1.141628 | 1.110220  | -2.262628 |
| C | 2.166950  | 0.226026  | 4.025322  | C  | -0.962387 | 2.236094  | -3.252267 |

|                     |           |           |           |    |           |           |           |
|---------------------|-----------|-----------|-----------|----|-----------|-----------|-----------|
| H                   | -0.969226 | 3.207284  | -2.741429 | H  | 0.202474  | -5.098250 | 1.128353  |
| H                   | -0.036594 | 2.107356  | -3.831113 | H  | -2.823839 | -5.759996 | -2.517830 |
| H                   | -1.803059 | 2.200074  | -3.964865 | P  | 0.264616  | 0.586880  | -0.749325 |
| O                   | -0.792609 | -0.050280 | -2.744209 | P  | 0.124944  | -0.356498 | 2.516945  |
| O                   | -1.588279 | 1.295204  | -1.133975 | Pd | 1.608409  | 0.808158  | 1.220338  |
| <b>TS1a[re,cis]</b> |           |           |           | C  | 3.258719  | 1.152252  | 2.500992  |
| C                   | -5.465329 | -0.849413 | 2.097981  | C  | 3.643442  | 1.650205  | 1.196129  |
| C                   | -4.193726 | -1.078454 | 1.616874  | C  | 4.355885  | 0.732331  | 0.248499  |
| C                   | -3.486049 | -0.067402 | 0.906694  | C  | 4.685683  | -0.649786 | 0.810166  |
| C                   | -4.124895 | 1.201506  | 0.708521  | C  | 5.075811  | -0.597302 | 2.285140  |
| C                   | -5.437656 | 1.402719  | 1.214491  | C  | 3.923224  | -0.060681 | 3.135477  |
| C                   | -6.096788 | 0.401223  | 1.893742  | H  | 2.931356  | 1.921853  | 3.207288  |
| H                   | -5.990507 | -1.638441 | 2.641408  | H  | 3.793119  | -1.287901 | 0.675289  |
| H                   | -3.715734 | -2.044781 | 1.780414  | H  | 5.484277  | -1.065049 | 0.179156  |
| C                   | -2.161501 | -0.274862 | 0.394878  | H  | 5.386651  | -1.593284 | 2.639406  |
| C                   | -3.420671 | 2.224148  | 0.018341  | H  | 5.953053  | 0.064081  | 2.396439  |
| H                   | -5.915269 | 2.373008  | 1.056131  | H  | 3.187224  | -0.865068 | 3.303393  |
| H                   | -7.105442 | 0.569402  | 2.278291  | H  | 4.291323  | 0.215996  | 4.138335  |
| C                   | -2.145409 | 2.017887  | -0.451168 | O  | 4.706618  | 1.030653  | -0.878648 |
| C                   | -1.505661 | 0.759166  | -0.272101 | C  | 3.456022  | 3.053758  | 0.958621  |
| H                   | -3.905466 | 3.193148  | -0.126286 | H  | 3.536549  | 3.669226  | 1.853146  |
| H                   | -1.586032 | 2.823186  | -0.929617 | C  | 3.563393  | 3.805286  | -0.270710 |
| C                   | -1.505542 | -1.606567 | 0.595827  | C  | 3.969679  | 5.154457  | -0.174920 |
| C                   | -1.870430 | -2.709985 | -0.245285 | C  | 3.209550  | 3.293940  | -1.536167 |
| C                   | -0.544252 | -1.787601 | 1.587112  | C  | 4.084729  | 5.948706  | -1.310515 |
| C                   | -2.832133 | -2.579675 | -1.286357 | H  | 4.201811  | 5.570181  | 0.808643  |
| C                   | -1.245585 | -3.986361 | -0.047888 | C  | 3.314406  | 4.093447  | -2.668762 |
| C                   | 0.074510  | -3.056102 | 1.767946  | H  | 2.834538  | 2.279590  | -1.612940 |
| C                   | -3.162568 | -3.655039 | -2.083127 | C  | 3.759623  | 5.414572  | -2.562333 |
| H                   | -3.305942 | -1.611394 | -1.449175 | H  | 4.416821  | 6.985596  | -1.223547 |
| C                   | -1.612347 | -5.075014 | -0.884247 | H  | 3.033773  | 3.688514  | -3.643322 |
| C                   | -0.271835 | -4.125341 | 0.977644  | H  | 3.837733  | 6.037515  | -3.457086 |
| H                   | 0.832159  | -3.178528 | 2.545943  | O  | 1.385110  | 3.541436  | 1.565297  |
| C                   | -2.551017 | -4.915815 | -1.880414 | C  | 0.549195  | 3.928941  | 0.678115  |
| H                   | -3.901899 | -3.534455 | -2.878295 | O  | 0.466819  | 3.493941  | -0.483307 |
| H                   | -1.132206 | -6.043644 | -0.723967 | C  | -0.456867 | 4.980648  | 1.144719  |
|                     |           |           |           | H  | -0.042135 | 5.604909  | 1.948475  |

|                    |           |           |           |    |           |           |           |
|--------------------|-----------|-----------|-----------|----|-----------|-----------|-----------|
| H                  | -0.779186 | 5.603721  | 0.297844  | H  | -1.625776 | -2.646132 | -3.528871 |
| H                  | -1.345732 | 4.461394  | 1.542050  | H  | -0.521109 | -2.648791 | -1.309989 |
| H                  | 0.344147  | 1.406579  | -1.895050 | H  | -2.932339 | -1.464665 | -5.276667 |
| H                  | 0.225268  | -0.685106 | -1.384672 | P  | 0.555347  | 3.208669  | -1.179158 |
| H                  | -1.047342 | 0.279489  | 3.001476  | P  | -0.240230 | 1.298360  | 1.673210  |
| H                  | 0.523017  | -1.002404 | 3.719295  | Pd | 1.690807  | 2.555909  | 1.109408  |
| <b>lla[re,cis]</b> |           |           |           | C  | 3.735421  | 3.350307  | 1.023599  |
| C                  | -5.579598 | 1.957913  | 0.748997  | C  | 3.695113  | 2.077213  | 1.663478  |
| C                  | -4.323053 | 1.683857  | 0.251544  | C  | 3.983920  | 1.985035  | 3.137412  |
| C                  | -3.387322 | 2.729401  | 0.013827  | C  | 3.882094  | 3.289103  | 3.900792  |
| C                  | -3.776818 | 4.076940  | 0.312492  | C  | 4.596551  | 4.419818  | 3.152413  |
| C                  | -5.079832 | 4.324631  | 0.821457  | C  | 3.998561  | 4.640559  | 1.759578  |
| C                  | -5.964626 | 3.289678  | 1.035214  | H  | 3.897599  | 3.360679  | -0.058659 |
| H                  | -6.284003 | 1.141541  | 0.924839  | H  | 2.807396  | 3.518857  | 4.019239  |
| H                  | -4.033285 | 0.655191  | 0.034890  | H  | 4.307625  | 3.122603  | 4.900222  |
| C                  | -2.070235 | 2.474479  | -0.494448 | H  | 4.544930  | 5.351896  | 3.736709  |
| C                  | -2.840710 | 5.125501  | 0.100706  | H  | 5.667380  | 4.165867  | 3.059538  |
| H                  | -5.367377 | 5.355157  | 1.044903  | H  | 3.038296  | 5.178740  | 1.848236  |
| H                  | -6.963190 | 3.493271  | 1.428760  | H  | 4.659319  | 5.281860  | 1.153954  |
| C                  | -1.583207 | 4.862358  | -0.384992 | O  | 4.315419  | 0.941787  | 3.662282  |
| C                  | -1.190013 | 3.532147  | -0.701961 | C  | 3.190173  | 1.026534  | 0.813352  |
| H                  | -3.134637 | 6.151269  | 0.337043  | H  | 3.444947  | 1.161761  | -0.243412 |
| H                  | -0.869285 | 5.676379  | -0.517689 | C  | 2.879490  | -0.384381 | 1.120084  |
| C                  | -1.639872 | 1.061291  | -0.739519 | C  | 2.984496  | -1.312476 | 0.066789  |
| C                  | -1.998643 | 0.398874  | -1.957243 | C  | 2.425469  | -0.855648 | 2.368379  |
| C                  | -0.896655 | 0.384201  | 0.226835  | C  | 2.675352  | -2.660959 | 0.249458  |
| C                  | -2.745286 | 1.049003  | -2.979945 | H  | 3.313513  | -0.964524 | -0.915591 |
| C                  | -1.586877 | -0.960083 | -2.165650 | C  | 2.111269  | -2.200502 | 2.549508  |
| C                  | -0.493444 | -0.962009 | 0.008165  | H  | 2.318187  | -0.167014 | 3.202501  |
| C                  | -3.070103 | 0.389455  | -4.146018 | C  | 2.236530  | -3.113076 | 1.494858  |
| H                  | -3.057287 | 2.083142  | -2.828130 | H  | 2.772269  | -3.357396 | -0.586845 |
| C                  | -1.941570 | -1.610579 | -3.378656 | H  | 1.764340  | -2.541714 | 3.527828  |
| C                  | -0.834897 | -1.613901 | -1.153109 | H  | 1.990623  | -4.166801 | 1.645649  |
| H                  | 0.094025  | -1.479095 | 0.767215  | O  | 0.280493  | 3.419804  | 3.679332  |
| C                  | -2.666936 | -0.953176 | -4.348516 | C  | 0.268374  | 4.386713  | 2.911325  |
| H                  | -3.642738 | 0.904611  | -4.920812 | O  | 0.781787  | 4.403018  | 1.725882  |
|                    |           |           |           | C  | -0.419581 | 5.684235  | 3.310967  |

|                        |           |           |           |   |            |           |           |
|------------------------|-----------|-----------|-----------|---|------------|-----------|-----------|
| H                      | -0.622676 | 5.698442  | 4.389820  | C | -4.181947  | -1.513142 | -1.147610 |
| H                      | 0.186323  | 6.555885  | 3.022206  | H | -4.602871  | -1.352433 | -2.136021 |
| H                      | -1.375455 | 5.754809  | 2.765850  | C | -2.836094  | -2.020010 | -1.115089 |
| H                      | 0.844509  | 4.456548  | -1.795998 | C | -2.207302  | -2.308765 | -2.507465 |
| H                      | 0.361796  | 2.474984  | -2.384181 | C | -6.562249  | -1.511519 | -0.306507 |
| H                      | -1.371829 | 1.994789  | 2.142868  | C | -7.084745  | -1.005739 | -1.508366 |
| H                      | -0.146446 | 0.272142  | 2.640646  | C | -7.452366  | -1.847016 | 0.727965  |
| <b>TS2a[S,R]_conf2</b> |           |           |           | C | -8.462480  | -0.851384 | -1.673341 |
| C                      | -5.256606 | 1.256385  | 1.255886  | H | -6.423269  | -0.694193 | -2.314990 |
| C                      | -4.886602 | 1.357090  | -0.137011 | C | -8.827751  | -1.699117 | 0.561588  |
| C                      | -5.825366 | 2.049964  | -1.064300 | H | -7.029072  | -2.226538 | 1.658807  |
| C                      | -6.927863 | 2.854814  | -0.395091 | C | -9.338165  | -1.202447 | -0.643072 |
| C                      | -7.622025 | 2.016979  | 0.681125  | H | -8.849982  | -0.444643 | -2.610086 |
| C                      | -6.641823 | 1.588700  | 1.776160  | H | -9.507612  | -1.970993 | 1.372798  |
| H                      | -4.715418 | 0.500442  | 1.828456  | H | -10.416345 | -1.083047 | -0.775032 |
| H                      | -6.478012 | 3.759193  | 0.055192  | F | -0.875049  | -2.245370 | -2.465804 |
| H                      | -7.623651 | 3.176362  | -1.182156 | F | -2.547004  | -3.549920 | -2.906368 |
| H                      | -8.465241 | 2.576044  | 1.116423  | F | -2.628520  | -1.457410 | -3.462994 |
| H                      | -8.050643 | 1.122723  | 0.205644  | O | -2.145893  | -2.267512 | -0.137979 |
| H                      | -6.564131 | 2.379038  | 2.541805  | O | -4.741932  | -1.970240 | 1.114203  |
| H                      | -7.035882 | 0.703042  | 2.300927  | C | 1.291200   | 4.109945  | 6.010124  |
| O                      | -5.771112 | 1.956505  | -2.279727 | C | 0.377294   | 4.542382  | 5.072995  |
| C                      | -3.649586 | 0.708265  | -0.503866 | C | 0.351961   | 3.983132  | 3.764003  |
| H                      | -3.195240 | 0.207913  | 0.353656  | C | 1.303026   | 2.958723  | 3.440067  |
| C                      | -2.649272 | 1.023800  | -1.534685 | C | 2.233527   | 2.538818  | 4.429022  |
| C                      | -1.317423 | 0.682346  | -1.204189 | C | 2.229546   | 3.099747  | 5.687544  |
| C                      | -2.892344 | 1.640792  | -2.776825 | H | 1.292046   | 4.548928  | 7.010496  |
| C                      | -0.269227 | 0.950380  | -2.081431 | H | -0.342669  | 5.319570  | 5.331231  |
| H                      | -1.122422 | 0.198497  | -0.246643 | C | -0.599000  | 4.399145  | 2.774416  |
| C                      | -1.836289 | 1.916863  | -3.643670 | C | 1.283308   | 2.388688  | 2.139698  |
| H                      | -3.916344 | 1.877050  | -3.054574 | H | 2.953113   | 1.757524  | 4.171902  |
| C                      | -0.523515 | 1.574105  | -3.305499 | H | 2.948389   | 2.766818  | 6.439657  |
| H                      | 0.748866  | 0.659028  | -1.812867 | C | 0.359504   | 2.792169  | 1.206433  |
| H                      | -2.044373 | 2.392506  | -4.605173 | C | -0.595385  | 3.798359  | 1.517485  |
| H                      | 0.295783  | 1.782273  | -3.997864 | H | 2.011077   | 1.612491  | 1.890935  |
| C                      | -5.090554 | -1.696532 | -0.048599 | H | 0.344443   | 2.332262  | 0.218460  |
|                        |           |           |           | C | -1.581954  | 5.477169  | 3.114484  |

|                        |           |           |           |   |           |           |           |
|------------------------|-----------|-----------|-----------|---|-----------|-----------|-----------|
| C                      | -1.168005 | 6.849252  | 3.060100  | C | -6.704235 | 1.639843  | 1.550906  |
| C                      | -2.886608 | 5.164629  | 3.489298  | H | -4.795759 | 0.530030  | 1.779694  |
| C                      | 0.148558  | 7.227001  | 2.672773  | H | -6.540085 | 3.650332  | -0.330290 |
| C                      | -2.104897 | 7.882539  | 3.397013  | H | -7.561337 | 2.908415  | -1.590345 |
| C                      | -3.807420 | 6.198823  | 3.816303  | H | -8.532952 | 2.440563  | 0.689228  |
| C                      | 0.518132  | 8.554213  | 2.624927  | H | -7.967724 | 0.941340  | -0.059681 |
| H                      | 0.866383  | 6.449302  | 2.410572  | H | -6.678582 | 2.533913  | 2.196419  |
| C                      | -1.689791 | 9.240395  | 3.340450  | H | -7.111736 | 0.828332  | 2.173421  |
| C                      | -3.424733 | 7.518178  | 3.776413  | O | -5.562863 | 1.730691  | -2.458206 |
| H                      | -4.828850 | 5.938379  | 4.104182  | C | -3.554333 | 0.670460  | -0.482081 |
| C                      | -0.406579 | 9.571711  | 2.963309  | H | -3.149218 | 0.204293  | 0.417823  |
| H                      | 1.532792  | 8.824586  | 2.323711  | C | -2.492269 | 0.970825  | -1.452007 |
| H                      | -2.410303 | 10.019788 | 3.600712  | C | -1.190307 | 0.576683  | -1.066851 |
| H                      | -4.136506 | 8.305529  | 4.036426  | C | -2.648309 | 1.623222  | -2.691511 |
| H                      | -0.099324 | 10.619167 | 2.922786  | C | -0.092905 | 0.813056  | -1.891212 |
| P                      | -1.962968 | 4.096035  | 0.326120  | H | -1.057724 | 0.071688  | -0.110958 |
| P                      | -3.508573 | 3.447820  | 3.337030  | C | -1.543113 | 1.872181  | -3.503054 |
| Pd                     | -3.796705 | 2.809917  | 1.119833  | H | -3.646243 | 1.902333  | -3.018321 |
| H                      | -4.556147 | 3.470204  | 4.296750  | C | -0.263265 | 1.464818  | -3.114738 |
| H                      | -2.561185 | 2.691183  | 4.068241  | H | 0.898928  | 0.476602  | -1.580577 |
| H                      | -1.977770 | 5.512381  | 0.230663  | H | -1.687504 | 2.372178  | -4.463721 |
| H                      | -1.317391 | 3.800378  | -0.900963 | H | 0.594194  | 1.644580  | -3.767380 |
| H                      | -3.340198 | -2.010339 | 1.966797  | C | -2.692491 | -2.030943 | -1.275921 |
| C                      | -1.991716 | -0.943712 | 2.840301  | C | -4.059380 | -1.559437 | -1.103962 |
| C                      | -0.813515 | -1.067590 | 3.776318  | H | -4.660420 | -1.362814 | -1.987405 |
| H                      | -0.500698 | -0.078597 | 4.133601  | C | -4.782353 | -1.839894 | 0.089691  |
| H                      | -1.049001 | -1.731744 | 4.620083  | C | -6.326390 | -1.844623 | -0.047534 |
| H                      | 0.021772  | -1.525238 | 3.220617  | C | -2.127856 | -2.081578 | -2.672651 |
| O                      | -2.645684 | -2.069456 | 2.693347  | C | -2.766673 | -1.533133 | -3.795502 |
| O                      | -2.273309 | 0.105722  | 2.276026  | C | -0.864633 | -2.674065 | -2.835071 |
| <b>TS2a[S,S]_conf2</b> |           |           |           | C | -2.155707 | -1.578885 | -5.050201 |
| C                      | -5.288052 | 1.269129  | 1.141914  | H | -3.734805 | -1.042511 | -3.699249 |
| C                      | -4.821035 | 1.320020  | -0.224355 | C | -0.258217 | -2.727293 | -4.087086 |
| C                      | -5.718051 | 1.903598  | -1.260999 | H | -0.378402 | -3.079934 | -1.946748 |
| C                      | -6.907999 | 2.688848  | -0.734716 | C | -0.903000 | -2.176801 | -5.200473 |
| C                      | -7.630446 | 1.901334  | 0.360702  | H | -2.660253 | -1.137882 | -5.913185 |
|                        |           |           |           | H | 0.723078  | -3.195361 | -4.199594 |

|   |           |           |           |    |           |           |           |
|---|-----------|-----------|-----------|----|-----------|-----------|-----------|
| H | -0.427407 | -2.212661 | -6.183927 | C  | -3.488173 | 7.523381  | 3.761654  |
| F | -6.923689 | -1.464044 | 1.088753  | H  | -4.940553 | 5.973822  | 4.014857  |
| F | -6.769916 | -1.023426 | -1.024488 | C  | -0.391220 | 9.513158  | 3.099986  |
| F | -6.758995 | -3.080364 | -0.341647 | H  | 1.557802  | 8.726250  | 2.542770  |
| O | -4.359787 | -2.095414 | 1.220749  | H  | -2.411097 | 10.002479 | 3.650106  |
| O | -1.981046 | -2.366048 | -0.328744 | H  | -4.193148 | 8.324994  | 3.995291  |
| C | 1.027505  | 3.973017  | 6.183507  | H  | -0.059092 | 10.553614 | 3.081044  |
| C | 0.172908  | 4.439829  | 5.207679  | P  | -1.949962 | 4.091129  | 0.352481  |
| C | 0.203410  | 3.901155  | 3.890225  | P  | -3.641624 | 3.458168  | 3.289349  |
| C | 1.150259  | 2.863441  | 3.598152  | Pd | -3.829598 | 2.820868  | 1.056674  |
| C | 2.018919  | 2.407834  | 4.626596  | H  | -4.732402 | 3.499826  | 4.198831  |
| C | 1.960136  | 2.947895  | 5.892919  | H  | -2.746023 | 2.675760  | 4.057235  |
| H | 0.985004  | 4.395646  | 7.189974  | H  | -1.934119 | 5.507950  | 0.262013  |
| H | -0.543856 | 5.227728  | 5.441244  | H  | -1.257513 | 3.787361  | -0.847291 |
| C | -0.690491 | 4.348902  | 2.861997  | H  | -2.821788 | -2.043439 | 1.905973  |
| C | 1.184436  | 2.313010  | 2.289889  | C  | -1.707549 | -0.779406 | 2.834497  |
| H | 2.734356  | 1.615143  | 4.394013  | C  | -0.543814 | -0.706278 | 3.793863  |
| H | 2.631076  | 2.587014  | 6.675758  | H  | -0.401601 | 0.321549  | 4.147661  |
| C | 0.312467  | 2.744440  | 1.320213  | H  | -0.695992 | -1.392262 | 4.639966  |
| C | -0.639838 | 3.762204  | 1.599581  | H  | 0.367952  | -1.035727 | 3.269270  |
| H | 1.910376  | 1.527926  | 2.064734  | O  | -2.085491 | -2.010527 | 2.586603  |
| H | 0.336676  | 2.297847  | 0.326625  | O  | -2.214650 | 0.217077  | 2.336997  |
| C | -1.664004 | 5.445507  | 3.167714  |    |           |           |           |
| C | -1.217099 | 6.808086  | 3.142294  |    |           |           |           |
| C | -2.990607 | 5.159939  | 3.481690  |    |           |           |           |
| C | 0.123729  | 7.158332  | 2.817334  |    |           |           |           |
| C | -2.144783 | 7.860203  | 3.444520  |    |           |           |           |
| C | -3.901685 | 6.212821  | 3.774788  |    |           |           |           |
| C | 0.524766  | 8.477092  | 2.796027  |    |           |           |           |
| H | 0.835091  | 6.366305  | 2.581747  |    |           |           |           |
| C | -1.697223 | 9.208613  | 3.416663  |    |           |           |           |

## 5. Experimental procedures and characterization data

### 5.1 General procedure for the synthesis of Morita-Baylis-Hillman acetate **1**

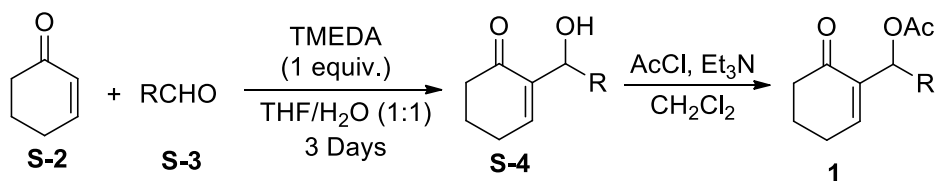

Morita-Baylis-Hillman acetates **1** were synthesized according to the reported procedure. Cyclohexenone **S-2** (30 mmol), benzylaldehyde (15 mmol) and *N,N,N',N'*-tetramethyl-1,3-propanediamine (15 mmol) were dissolved in THF/H<sub>2</sub>O (30 mL, V/V = 1:1). The mixture was then stirred at room temperature for three days before saturated NH<sub>4</sub>Cl (aq) solution was added. The resulting mixture was extracted with EtOAc twice. The organic phase was dried over MgSO<sub>4</sub> and concentrated under reduced pressure. The crude product was then purified *via* flash column chromatography (Petroleum Ether/EtOAc = 1:5-1:3) over silica gel to give Morita-Baylis-Hillman alcohol **S-4** as yellow oil. To a solution of Morita-Baylis-Hillman alcohol **S-4** (1.0 equiv.) in CH<sub>2</sub>Cl<sub>2</sub> was added Et<sub>3</sub>N (2.0 equiv.). Then acetyl chloride (1.5 equiv.) was added dropwise under ice bath over 30 minutes. The mixture was stirred at room temperature for 12 h. Then the reaction solution was filtered and concentrated under reduced pressure. The residue was purified through silica gel flash column chromatography (Petroleum Ether/EtOAc = 1:9-1:5) to yield Morita-Baylis-Hillman acetate **1**.

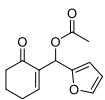 2-[(acetyloxy)(2-furyl)methyl]-2-cyclohexen-1-one **1e**: Colorless oil (1.7 g, 7.4 mmol, 49% yield over two steps); IR (KBr)  $\nu$  3121, 2947, 1742, 1675, 1370, 1227, 1017, 920, 749 cm<sup>-1</sup>; <sup>1</sup>H NMR (CDCl<sub>3</sub>, 400 MHz)  $\delta$  7.36-7.37 (m, 1H), 7.12 (t, *J* = 4.2 Hz, 1H), 6.79 (s, 1H), 6.28-6.32 (m, 2H), 2.44-2.49 (m, 4H), 2.08 (s, 3H), 1.99-2.06 (m, 2H); <sup>13</sup>C NMR (CDCl<sub>3</sub>, 100 MHz)  $\delta$  196.6, 169.4, 151.1, 147.1, 142.8, 136.1, 110.4, 109.3, 64.8, 38.1, 29.7, 25.8, 22.5, 21.0; HRMS (TOF-ES<sup>+</sup>) *m/z*: [M+Na]<sup>+</sup> calcd for C<sub>13</sub>H<sub>14</sub>O<sub>4</sub>Na 257.0790, found 257.0796.

## 5.2 Experimental procedure for the synthesis of 3

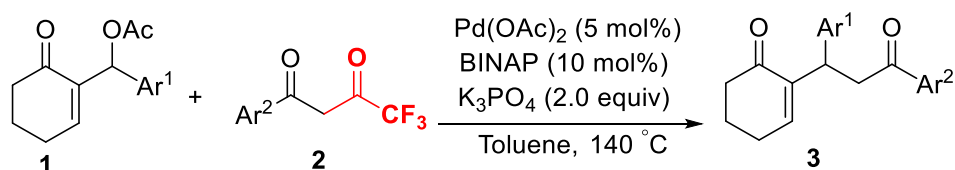

To a solution of Morita-Baylis-Hillman acetate **1** (0.4 mmol, 2.0 equiv.) and 1,3-dione **2** (0.2 mmol, 1.0 equiv.) in toluene was added Pd(OAc)<sub>2</sub> (0.01 mmol, 2.2 mg, 5 mol%), *S*-BINAP (0.02 mmol, 12.5 mg, 10 mol%) and K<sub>3</sub>PO<sub>4</sub> or K<sub>2</sub>CO<sub>3</sub> (0.4 mmol, 2.0 equiv.) respectively. The mixture was sequentially stirred at room temperature for five minutes and then at the given temperature for the specified time. After the reaction was completed, the mixture was cooled to room temperature, evaporated and purified by flash column chromatography (Petroleum Ether/EtOAc = 1:19-1:9) over silica gel to give the product **3**.

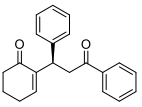 2-[(2-oxo-2-phenylethyl)(phenyl)methyl]-2-cyclohexen-1-one **3a**: Colorless oil (39.5 mg, 0.13 mmol, 65% yield, 88.5:11.5 er);  $[\alpha]_{\text{D}}^{20} = +43.4$  (c=0.05 in CH<sub>2</sub>Cl<sub>2</sub>) (*R*-**3a**, 88.5:11.5 er);  $[\alpha]_{\text{D}}^{20} = -26.1$  (c=0.04 in CH<sub>2</sub>Cl<sub>2</sub>) (*S*-**3a**, 23:77 er); IR (KBr)  $\nu$  3060, 2923, 1739, 1674, 1449, 1245, 983, 751 cm<sup>-1</sup>; <sup>1</sup>H NMR (CDCl<sub>3</sub>, 400 MHz)  $\delta$  7.94-7.96 (m, 2H), 7.54 (t, *J* = 7.2 Hz, 1H), 7.43 (t, *J* = 7.6 Hz, 2H), 7.24-7.29 (m, 4H), 7.15-7.20 (m, 1H), 6.71 (t, *J* = 4.2 Hz, 1H), 4.64 (t, *J* = 7.4 Hz, 1H), 3.62 (dd, *J* = 16.8, 7.2 Hz, 1H), 3.45 (dd, *J* = 16.8, 7.6 Hz, 1H), 2.33-2.47 (m, 4H), 1.90-1.99 (m, 2H); <sup>13</sup>C NMR (CDCl<sub>3</sub>, 100 MHz)  $\delta$  198.5, 198.3, 146.0, 145.9, 142.4, 141.7, 136.9, 133.1, 128.6, 128.4, 128.2, 128.0, 126.5, 43.0, 40.5, 38.8, 26.2, 22.7; HRMS (TOF-ES<sup>+</sup>) *m/z*: [M+Na]<sup>+</sup> calcd for C<sub>21</sub>H<sub>20</sub>O<sub>2</sub>Na 327.1361, found 327.1349; HPLC analysis: (CHIRALCEL OD-H, 10% *i*-propanol/hexane, 1 mL/min, UV: 254 nm), *t*<sub>R</sub> = 8.5 min (major), 9.2 min (minor).

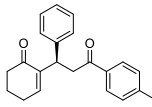 2-[(2-oxo-2-(4-methylphenyl)ethyl)(phenyl)methyl]-2-cyclohexen-1-one **3b**: Colorless oil (45.2 mg, 0.14 mmol, 71% yield, 87.5:12.5 er);  $[\alpha]_{\text{D}}^{20} = +21.2$  (c=0.06 in CH<sub>2</sub>Cl<sub>2</sub>); IR (KBr)  $\nu$  3029, 2924, 1674, 1605, 1493, 1249, 1177, 977, 814 cm<sup>-1</sup>; <sup>1</sup>H NMR (CDCl<sub>3</sub>, 400 MHz)  $\delta$  7.84 (d, *J* = 8.4 Hz, 2H), 7.22-7.29 (m, 6H), 7.15-7.19 (m, 1H), 6.71 (t, *J* = 3.6 Hz, 1H), 4.62 (t, *J* = 7.2 Hz, 1H), 3.59 (dd, *J* = 16.4,



7.2 Hz, 1H), 3.41 (dd,  $J = 16.8, 7.6$  Hz, 1H), 2.34-2.44 (m, 7H), 1.89-1.98 (m, 2H);  $^{13}\text{C}$  NMR ( $\text{CDCl}_3$ , 100 MHz)  $\delta$  198.4, 197.9, 145.8, 143.8, 142.6, 141.7, 134.5, 129.3, 128.4, 128.3, 128.0, 126.4, 42.8, 40.6, 38.8, 25.2, 22.7, 21.7; HRMS (TOF-ES+)  $m/z$ :  $[\text{M}+\text{Na}]^+$  calcd for  $\text{C}_{22}\text{H}_{22}\text{O}_2\text{Na}$  341.1517, found 341.1508; HPLC analysis: (CHIRALCEL OD-H, 5% *i*-propanol/hexane, 1 mL/min, UV: 254 nm),  $t_{\text{R}} = 17.9$  min (major), 19.8 min (minor).

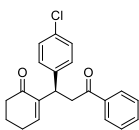

2-[(2-oxo-2-phenylethyl)(4-chlorophenyl)methyl]-2-cyclohexen-1-one **3c**:

White solid (49.4 mg, 0.15 mmol, 73% yield, 82:18 er); m.p. 85-86 °C;

$[\alpha]_{\text{D}}^{20} = +8.2$  (c=0.06 in  $\text{CH}_2\text{Cl}_2$ ); IR (KBr)  $\nu$  3065, 2925, 1673, 1478, 1351,

1248, 1048, 919, 760  $\text{cm}^{-1}$ ;  $^1\text{H}$  NMR ( $\text{CDCl}_3$ , 400 MHz)  $\delta$  7.92-7.95 (m, 2H), 7.53-7.57 (m, 1H), 7.45 (t,  $J = 7.6$  Hz, 2H), 7.18-7.23 (m, 4H), 6.72 (t,  $J = 4.2$  Hz, 1H), 4.59 (t,  $J = 7.4$  Hz, 1H), 3.60 (dd,  $J = 16.8, 6.8$  Hz, 1H), 3.43 (dd,  $J = 16.8, 8.0$  Hz, 1H), 2.34-2.47 (m, 4H), 1.90-1.98 (m, 2H);  $^{13}\text{C}$  NMR ( $\text{CDCl}_3$ , 100 MHz)  $\delta$  198.4, 198.0, 146.1, 141.4, 140.9, 136.8, 133.2, 132.1, 129.4, 128.6, 128.5, 128.1, 58.4, 42.6, 40.1, 38.8, 26.1, 22.6, 18.4; HRMS (TOF-ES+)  $m/z$ :  $[\text{M}+\text{Na}]^+$  calcd for  $\text{C}_{21}\text{H}_{19}\text{O}_2\text{ClNa}$  361.0971, found 361.0954; HPLC analysis: (CHIRALCEL OD-H, 10% *i*-propanol/hexane, 1 mL/min, UV: 254 nm),  $t_{\text{R}} = 10.4$  min (major), 13.2 min (minor).

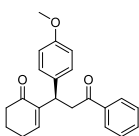

2-[(2-oxo-2-phenylethyl)(4-methoxychlorophenyl)methyl]-2-cyclohexen-1-

one **3d**: White solid (52.1 mg, 0.16 mmol, 78% yield, 85:15 er); m.p. 119-

120 °C;  $[\alpha]_{\text{D}}^{20} = +143.0$  (c=0.04 in  $\text{CH}_2\text{Cl}_2$ ) (*R*-**3l**, 98.5:1.5 er);  $[\alpha]_{\text{D}}^{20} = -131.4$

(c=0.03 in  $\text{CH}_2\text{Cl}_2$ ) (*S*-**3l**, 3:97% er); IR (KBr)  $\nu$  3449, 2925, 1662, 1511, 1323, 1244, 1029, 913, 824  $\text{cm}^{-1}$ ;  $^1\text{H}$  NMR ( $\text{CDCl}_3$ , 400 MHz)  $\delta$  7.95 (d,  $J = 7.2$  Hz, 2H), 7.54 (t,  $J = 7.4$  Hz, 1H), 7.44 (t,  $J = 7.6$  Hz, 2H), 7.17 (d,  $J = 8.4$  Hz, 2H), 6.80 (d,  $J = 8.8$  Hz, 2H), 6.70 (t,  $J = 4.0$  Hz, 1H), 4.57 (t,  $J = 7.4$  Hz, 1H), 3.76 (s, 3H), 3.60 (dd,  $J = 16.4, 6.8$  Hz, 1H), 3.40 (dd,  $J = 16.4, 8.0$  Hz, 1H), 2.33-2.43 (m, 4H), 1.90-1.98 (m, 2H);  $^{13}\text{C}$  NMR ( $\text{CDCl}_3$ , 100 MHz)  $\delta$  198.6, 198.5, 158.1, 145.7, 141.9, 136.9, 134.3, 133.0, 129.0, 128.6, 128.2, 113.8, 43.1, 40.0, 38.8, 26.1, 22.7, 18.4; HRMS (TOF-ES+)  $m/z$ :  $[\text{M}+\text{Na}]^+$  calcd for  $\text{C}_{22}\text{H}_{22}\text{O}_3\text{Na}$  357.1467, found 357.1444; HPLC analysis: (CHIRALCEL OD-H, 10% *i*-propanol/hexane, 1 mL/min, UV: 254 nm),  $t_{\text{R}} = 14.2$  min (major), 18.0 min (minor).

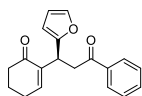

2-[(2-oxo-2-phenylethyl)(2-pyrrolyl)methyl]-2-cyclohexen-1-one **3e**:

Colorless oil (28.8 mg, 0.098 mmol, 49% yield, 92:8 er);  $[\alpha]_D^{20} = +46.2$  (c=0.04 in  $\text{CH}_2\text{Cl}_2$ ); IR (KBr)  $\nu$  3357, 2923, 1674, 1448, 1371, 1246, 1011, 909, 759  $\text{cm}^{-1}$ ;  $^1\text{H}$  NMR ( $\text{CDCl}_3$ , 400 MHz)  $\delta$  7.96-7.99 (m, 2H), 7.55 (t,  $J = 7.4$  Hz, 1H), 7.45 (t,  $J = 7.6$  Hz, 2H), 7.28 (d,  $J = 1.2$  Hz, 1H), 6.73 (t,  $J = 4.0$  Hz, 1H), 6.26 (dd,  $J = 3.2, 2.0$  Hz, 1H), 6.07 (d,  $J = 3.2$  Hz, 1H), 4.70 (t,  $J = 7.2$  Hz, 1H), 3.43-3.54 (m, 2H), 2.43-2.51 (m, 2H), 2.36 (dd,  $J = 10.8, 6.0$  Hz, 2H), 1.94-2.03 (m, 2H);  $^{13}\text{C}$  NMR ( $\text{CDCl}_3$ , 100 MHz)  $\delta$  198.1, 197.9, 155.3, 147.0, 141.3, 139.7, 136.8, 133.0, 128.6, 128.2, 110.3, 106.2, 41.7, 38.6, 34.7, 26.1, 22.7; HRMS (TOF-ES+)  $m/z$ :  $[\text{M}+\text{Na}]^+$  calcd for  $\text{C}_{19}\text{H}_{18}\text{O}_3\text{Na}$  317.1154, found 317.1149; HPLC analysis: (CHIRALCEL OD-H, 10% *i*-propanol/hexane, 1 mL/min, UV: 254 nm),  $t_R = 9.9$  min (major), 10.8 min (minor).

## 5.2 NMR Spectra

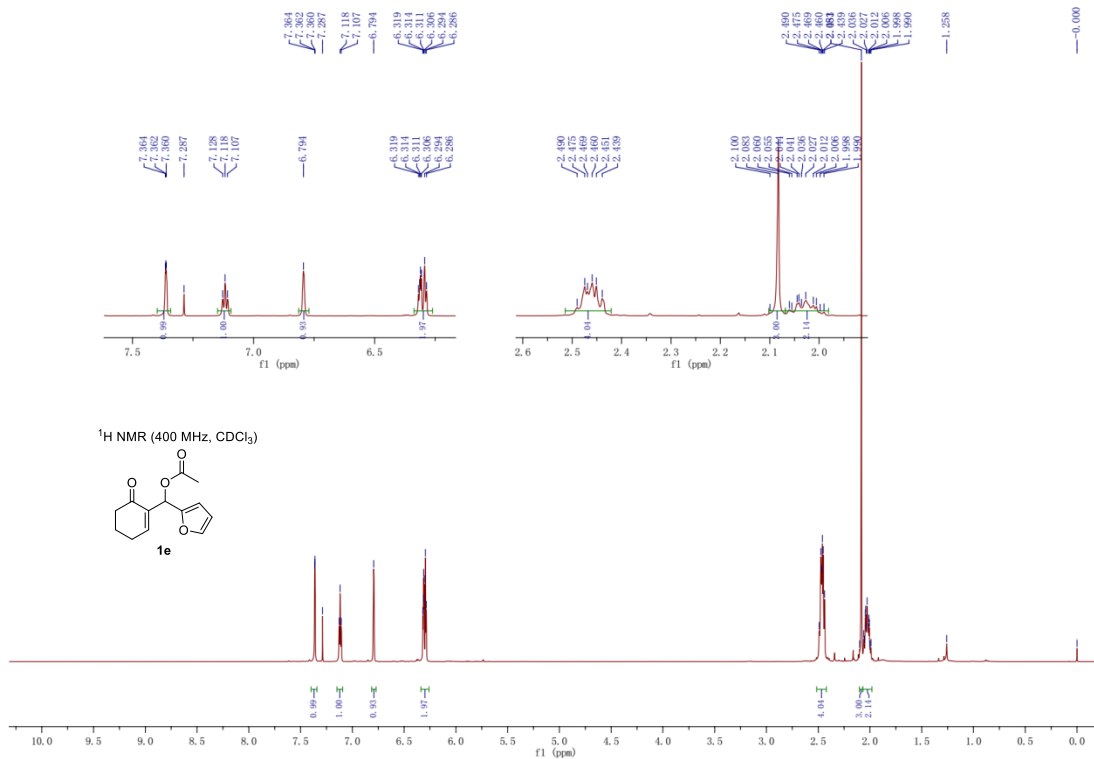

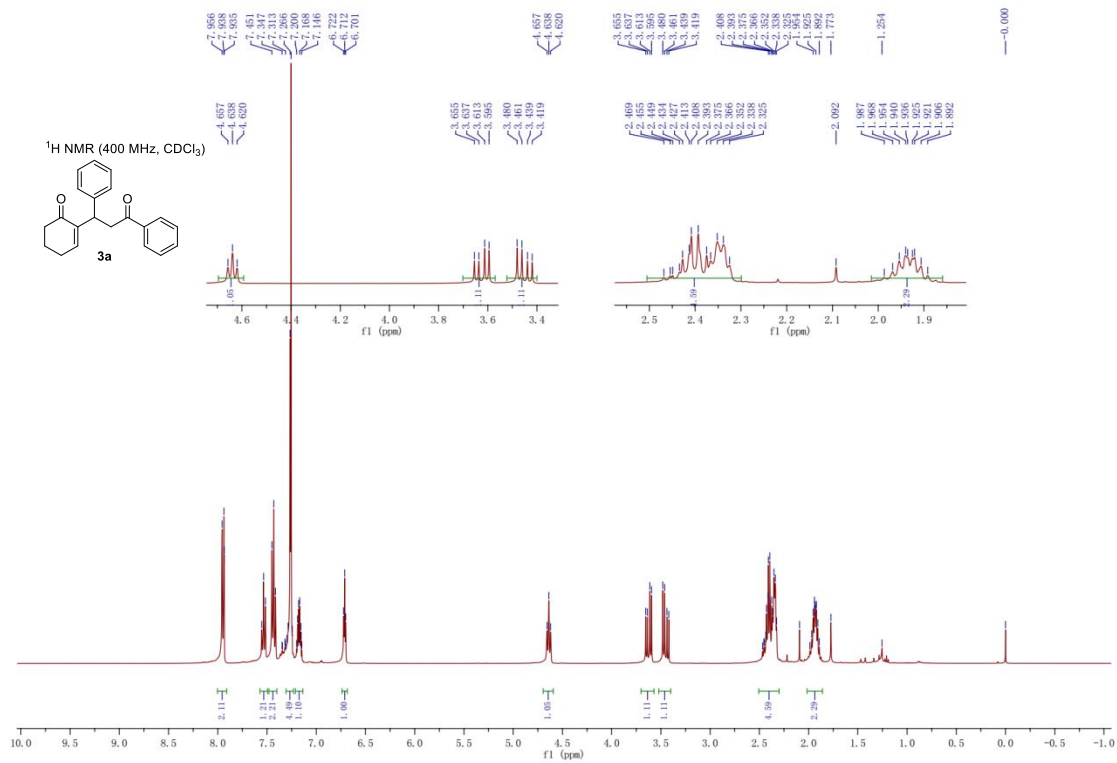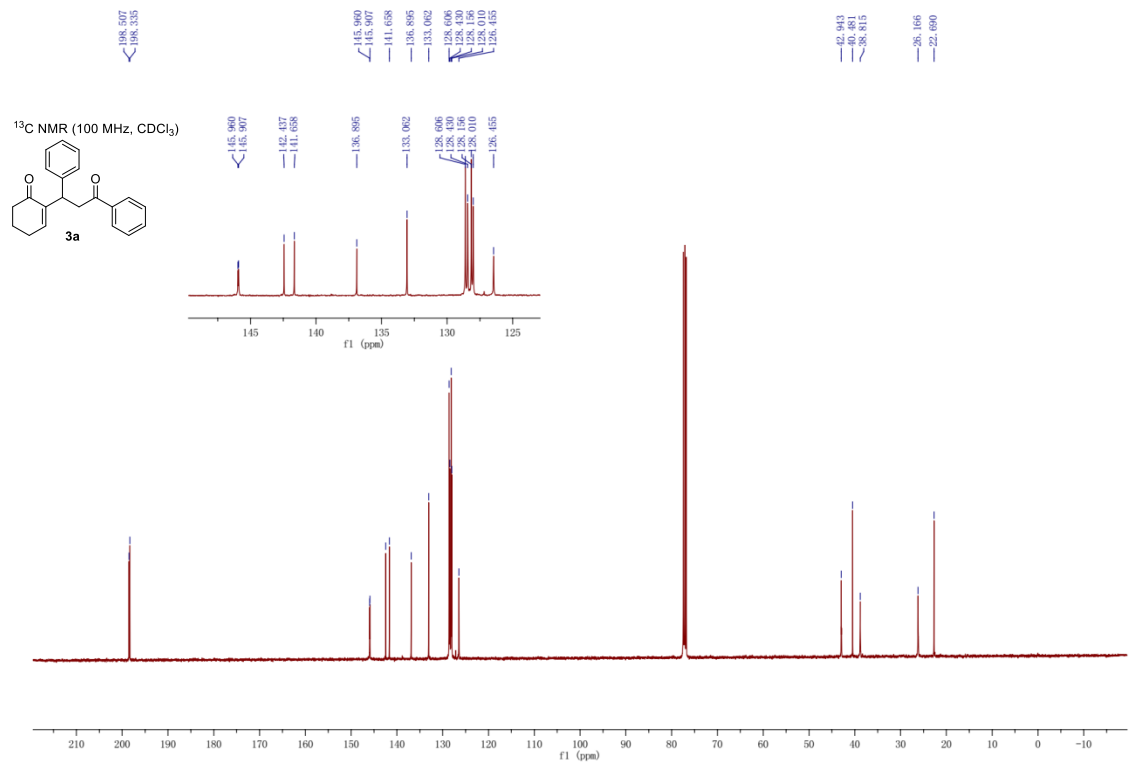

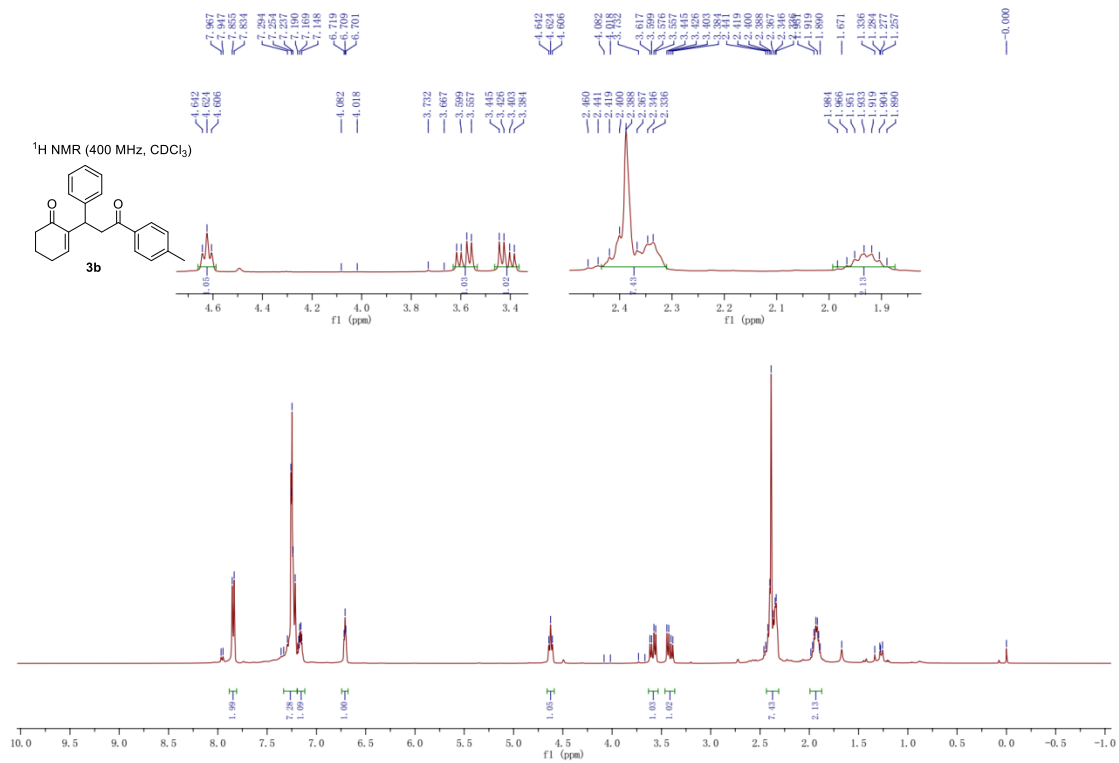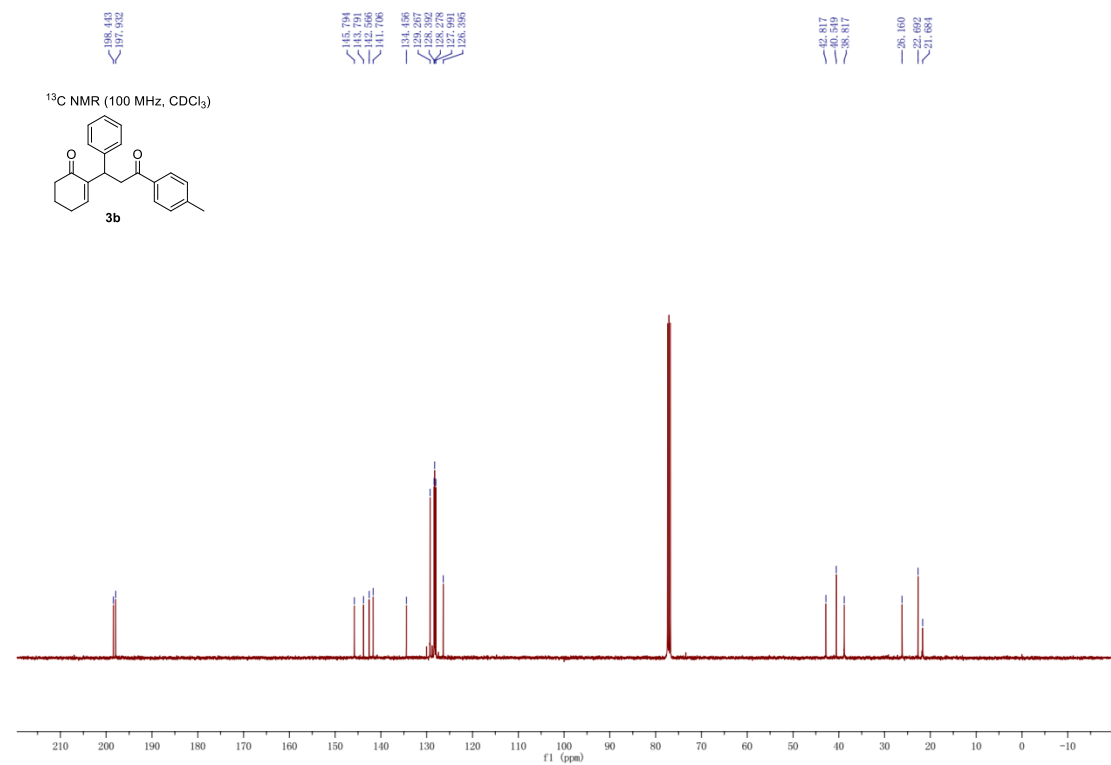

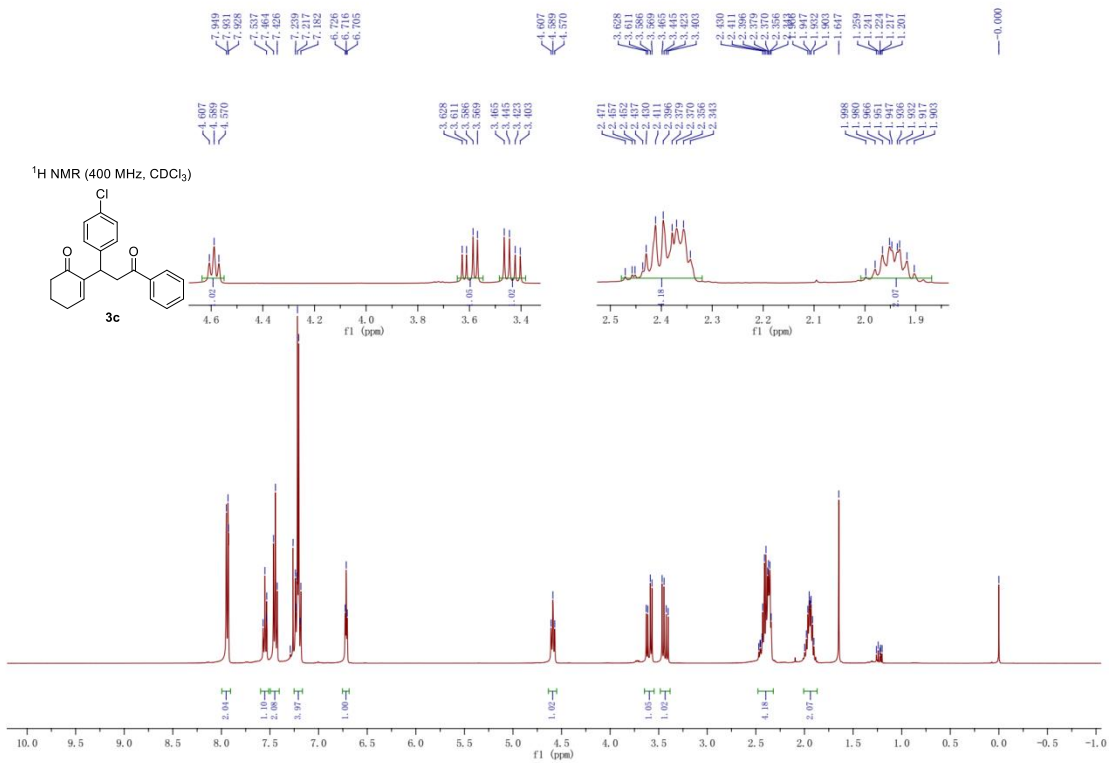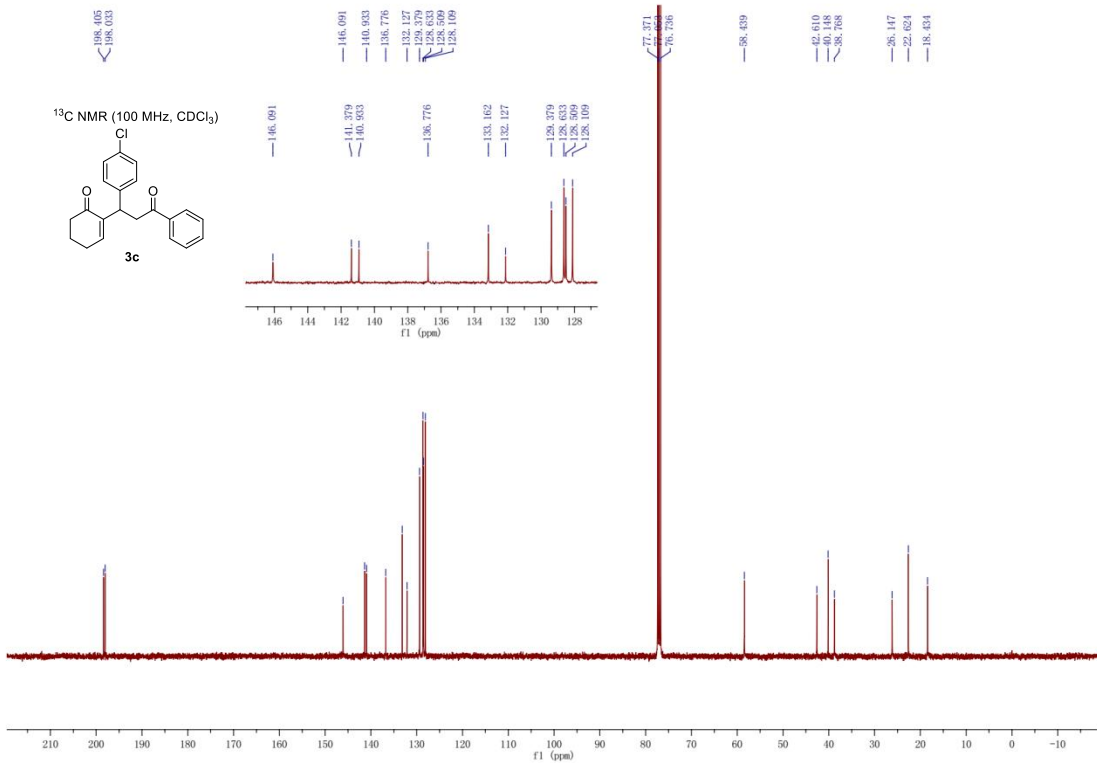

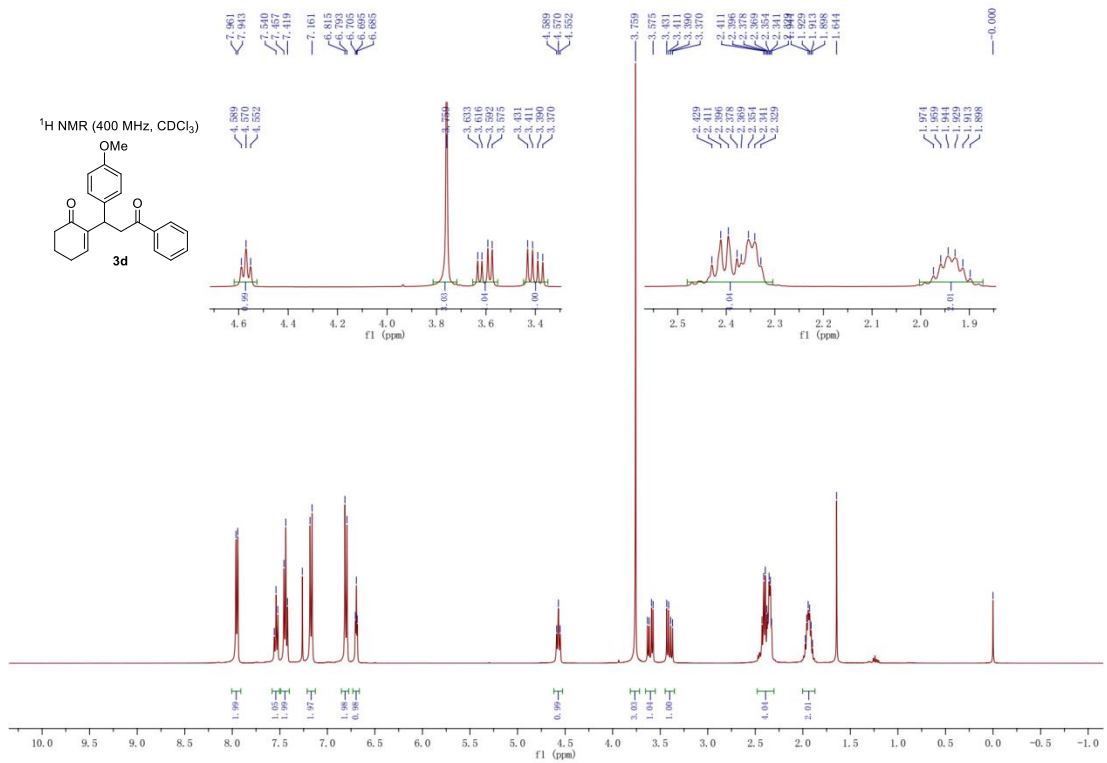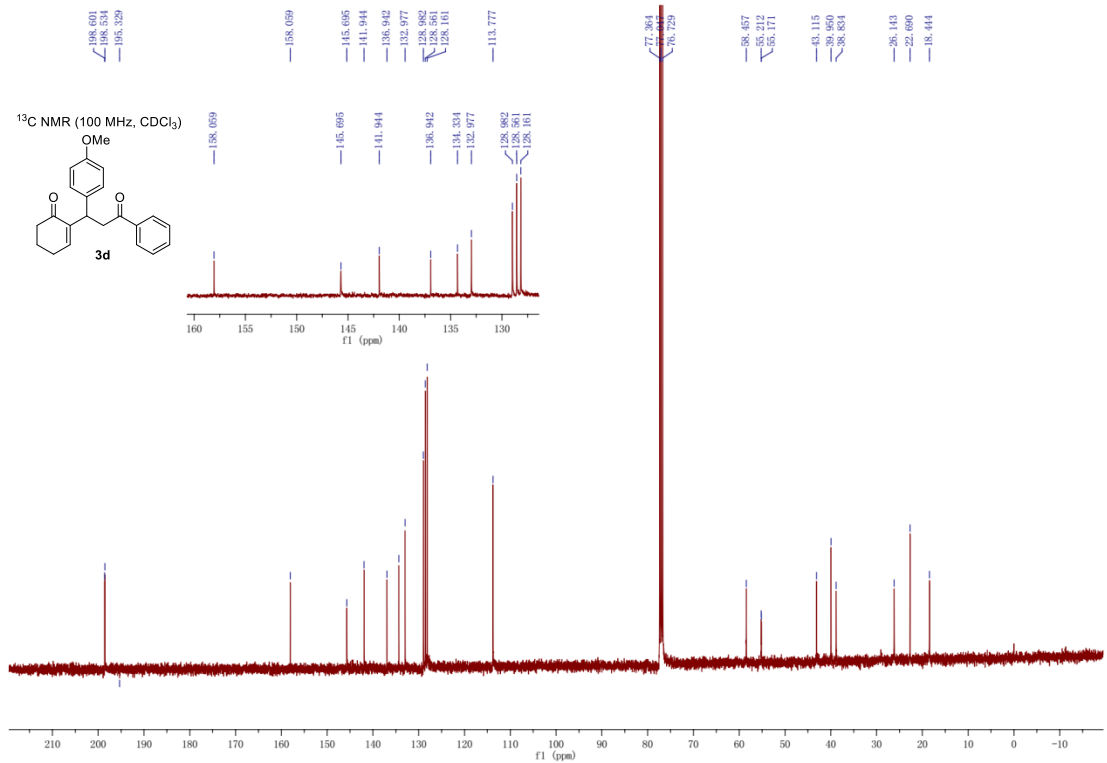





### 5.3 HPLC spectra

#### HPLC spectra of 3a

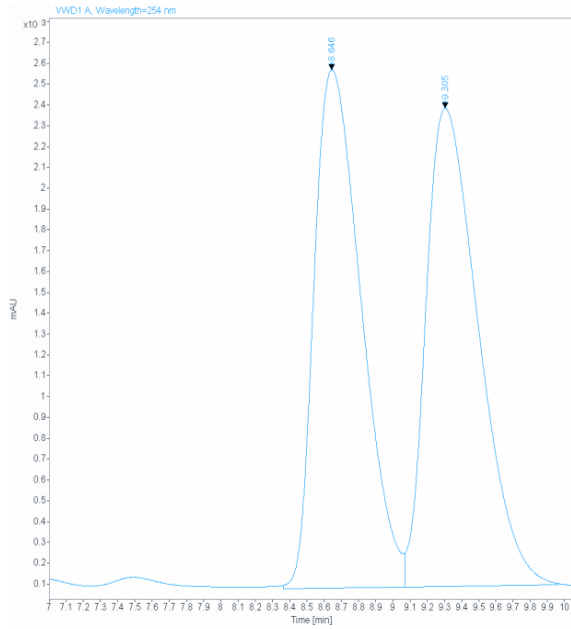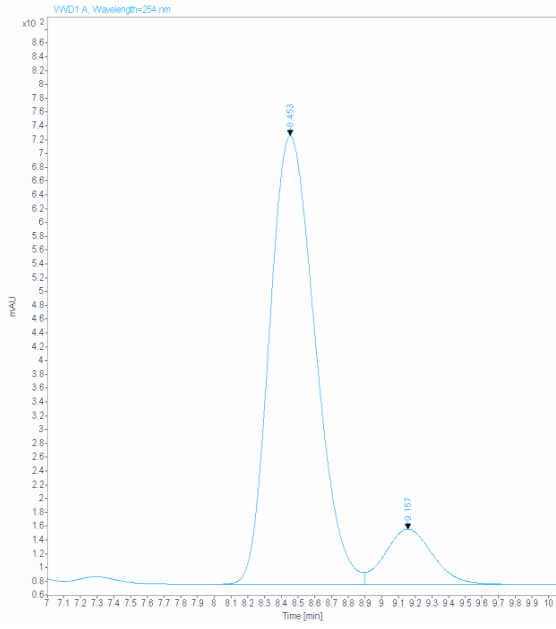

| RT [min] | Type | Width [min] | Area       | Height    | Area% Name | RT [min] | Type | Width [min] | Area       | Height   | Area% Name |
|----------|------|-------------|------------|-----------|------------|----------|------|-------------|------------|----------|------------|
| 8.646    | MF   | 0.3169      | 47325.2578 | 2489.0149 | 49.3257    | 8.453    | MF   | 0.3141      | 12247.6631 | 649.8004 | 88.5786    |
| 9.305    | FM   | 0.3528      | 48619.1094 | 2296.7419 | 50.6743    | 9.157    | FM   | 0.3295      | 1579.2275  | 79.8854  | 11.4214    |

#### HPLC spectra of 3b

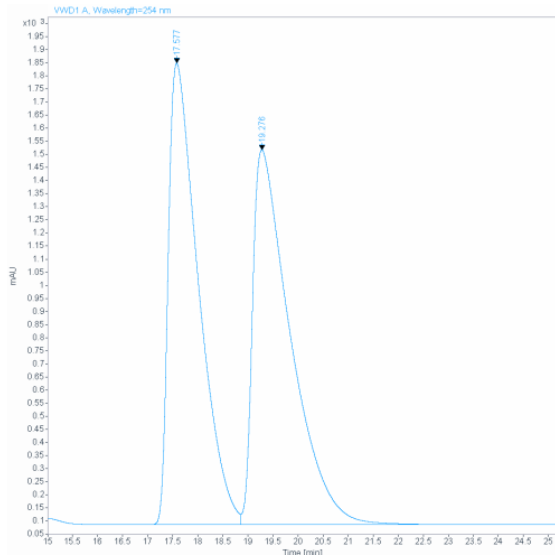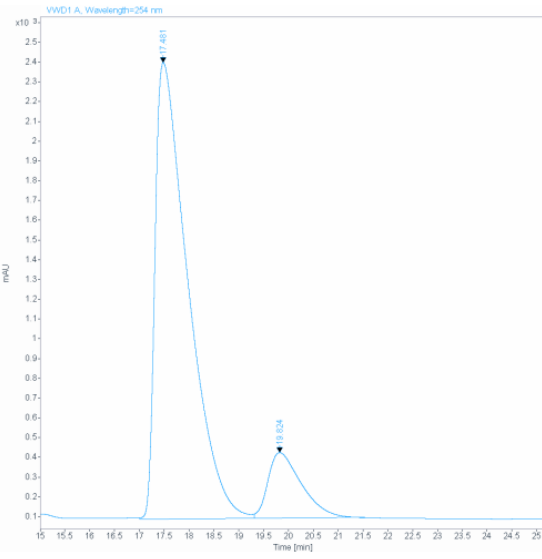

| RT [min] | Type | Width [min] | Area       | Height    | Area% Name | RT [min] | Type | Width [min] | Area        | Height    | Area% Name |
|----------|------|-------------|------------|-----------|------------|----------|------|-------------|-------------|-----------|------------|
| 17.577   | BV   | 0.6167      | 73129.1875 | 1762.0511 | 49.3856    | 17.481   | MF   | 0.7655      | 106064.8359 | 2309.2971 | 87.2996    |
| 19.276   | VB   | 0.7517      | 74948.8047 | 1430.5408 | 50.6144    | 19.824   | FM   | 0.7775      | 15430.3506  | 330.7573  | 12.7004    |

### HPLC spectra of 3c

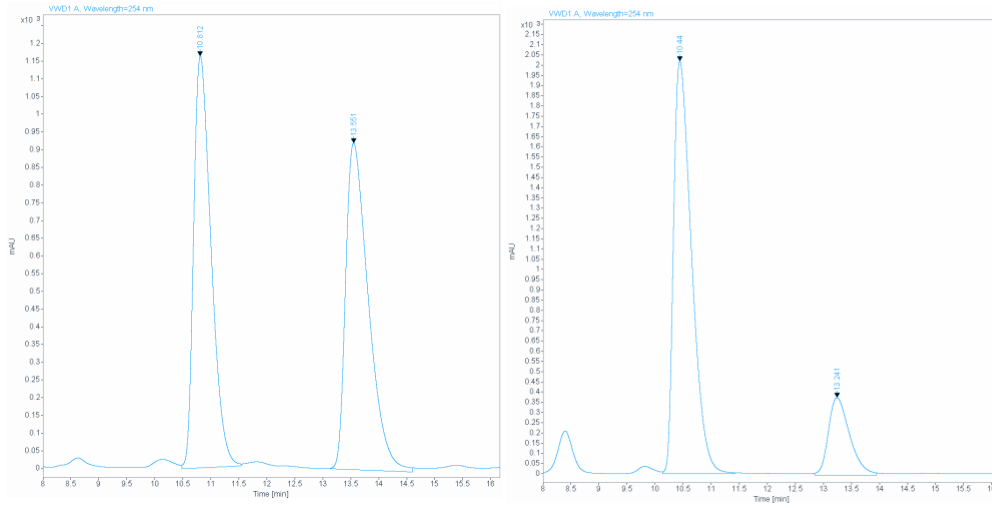

| RT [min] | Type | Width [min] | Area       | Height    | Area% Name | RT [min] | Type | Width [min] | Area       | Height    | Area% Name |
|----------|------|-------------|------------|-----------|------------|----------|------|-------------|------------|-----------|------------|
| 10.812   | MM   | 0.3602      | 25143.4453 | 1163.3221 | 49.1660    | 10.440   | MM   | 0.3727      | 45161.7266 | 2019.6235 | 81.8652    |
| 13.551   | MM   | 0.4696      | 25996.4746 | 922.7299  | 50.8340    | 13.241   | MM   | 0.4393      | 10004.2529 | 379.5688  | 18.1348    |

### HPLC spectra of 3d

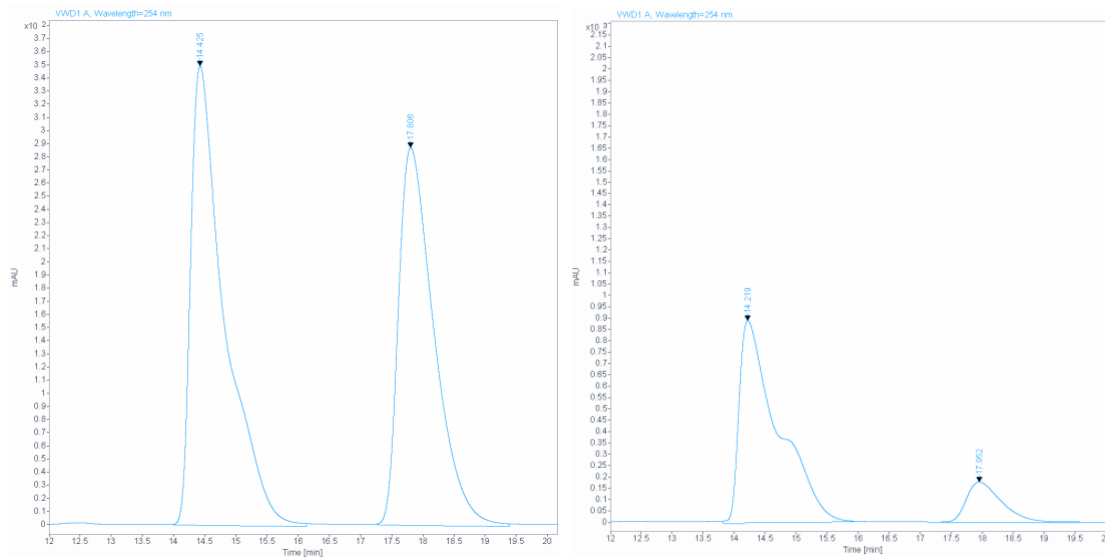

| RT [min] | Type | Width [min] | Area       | Height   | Area% Name | RT [min] | Type | Width [min] | Area       | Height   | Area% Name |
|----------|------|-------------|------------|----------|------------|----------|------|-------------|------------|----------|------------|
| 14.425   | MM   | 0.6256      | 13118.5762 | 349.5035 | 53.6075    | 14.219   | MM   | 0.7219      | 38677.9727 | 893.0164 | 84.9088    |
| 17.806   | MM   | 0.6586      | 11352.9648 | 287.2884 | 46.3925    | 17.952   | BB   | 0.5909      | 6874.4077  | 176.6926 | 15.0912    |

# HPLC spectra of 3e

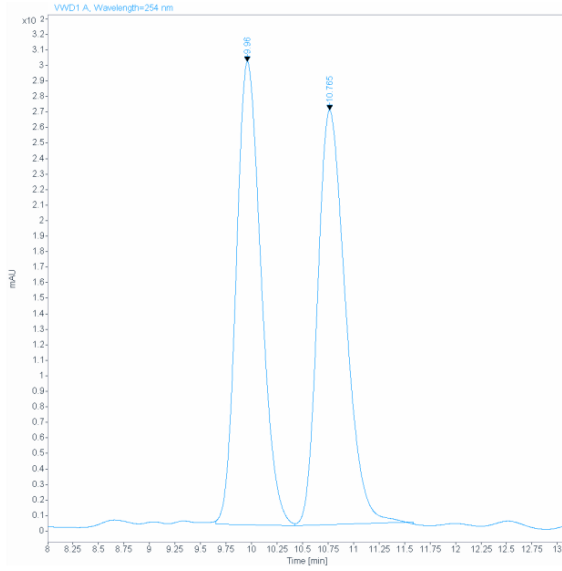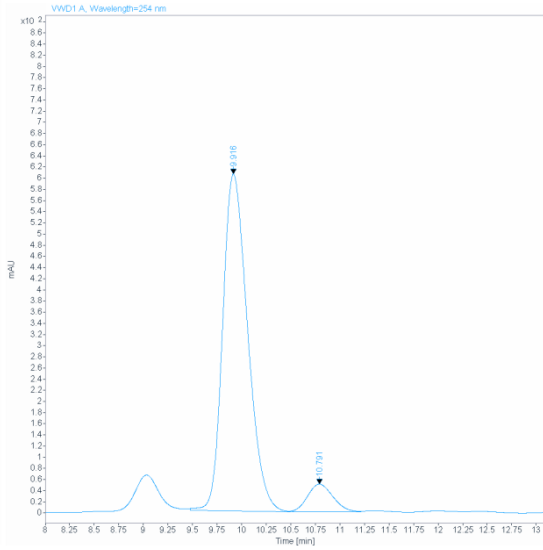

| RT [min] | Type | Width [min] | Area      | Height   | Area% Name | RT [min] | Type | Width [min] | Area       | Height   | Area% Name |
|----------|------|-------------|-----------|----------|------------|----------|------|-------------|------------|----------|------------|
| 9.960    | MM   | 0.2813      | 5035.7583 | 298.3152 | 49.8474    | 9.916    | MM   | 0.2945      | 10667.3643 | 603.7795 | 92.1847    |
| 10.765   | MM   | 0.3163      | 5066.5957 | 266.9731 | 50.1526    | 10.791   | MM   | 0.3018      | 904.3615   | 49.9488  | 7.8153     |

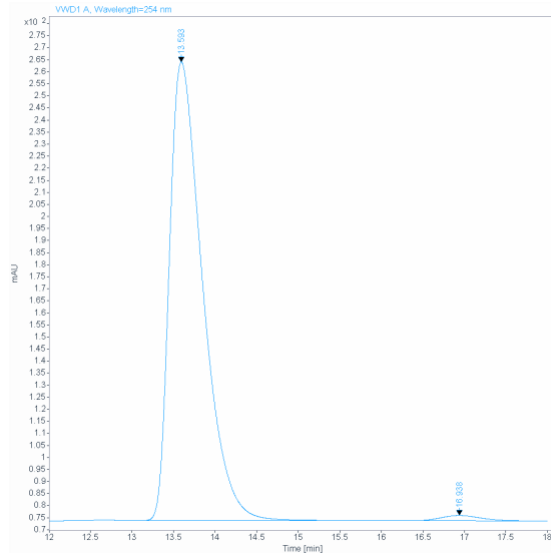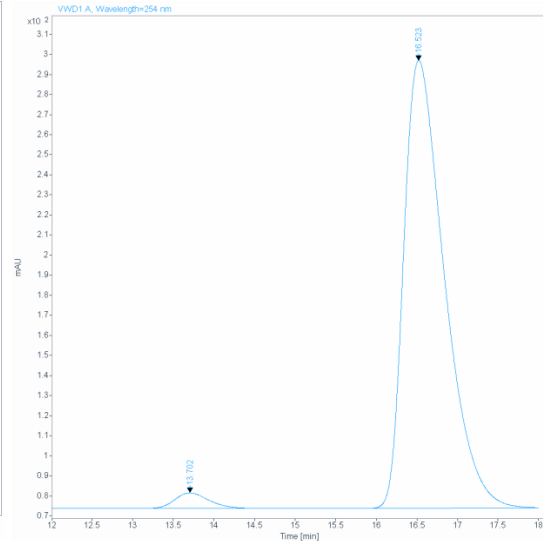

| RT [min] | Type | Width [min] | Area      | Height   | Area% Name | RT [min] | Type | Width [min] | Area      | Height   | Area% Name |
|----------|------|-------------|-----------|----------|------------|----------|------|-------------|-----------|----------|------------|
| 13.593   | BB   | 0.4217      | 5279.7661 | 190.3111 | 98.6220    | 13.702   | BB   | 0.4323      | 227.8969  | 7.7778   | 2.8663     |
| 16.938   | BB   | 0.4536      | 73.7724   | 2.2091   | 1.3780     | 16.523   | BBA  | 0.5269      | 7722.8813 | 223.0584 | 97.1337    |

## 6. X-ray single crystal structure for 3c

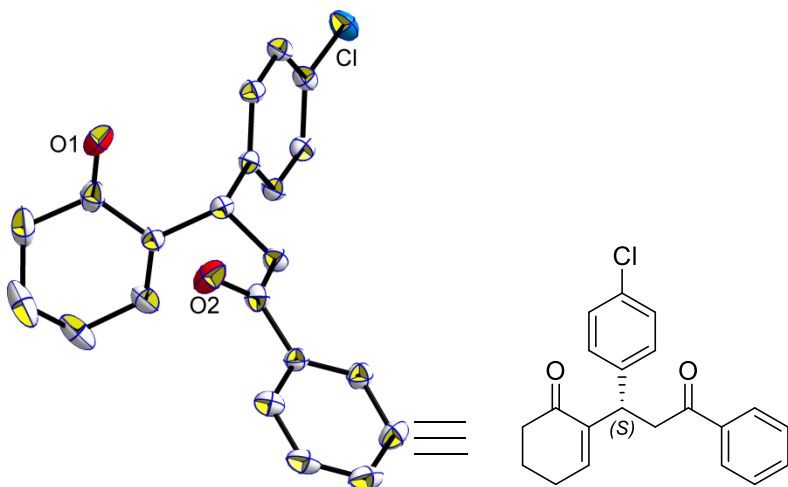

### Single crystal structure of compound (S)-3c (20% probability level)

|                                            |               |                                                                  |
|--------------------------------------------|---------------|------------------------------------------------------------------|
| <b>Compound 3c</b> (CCDC 1558121)          |               | <b>Flack parameter: 0.05</b>                                     |
| Bond precision: C-C = 0.0065 Å             |               | Wavelength= 0.71073                                              |
| a = 10.724(1)                              | b = 10.837(1) | c = 15.1156(15)                                                  |
| alpha = 90                                 | beta = 90     | gamma = 90                                                       |
| Cell setting: Orthorhombic                 |               | Moiety formula: C <sub>21</sub> H <sub>19</sub> ClO <sub>2</sub> |
| Cell volume = 1756.7(3)                    |               | Space group: P2(1)2(1)2(1)                                       |
| Data completeness= 0.99                    |               | Theta(max)= 25.010                                               |
| R(reflections)= 0.0530( 1547)              |               | WR2(reflections)= 0.1089( 3083)                                  |
| S = 0.894                                  |               | Radiation type: MoK $\alpha$                                     |
| Measurement device type: CCD area detector |               | Measurement method: phi and omega scans                          |
| Structure solution: SHELXS-97              |               | Structure refinement: SHELXL-97                                  |
| Solution primary: direct                   |               | Solution secondary: difmap                                       |
| Solution hydrogens: geom                   |               | Hydrogen treatment: mixed                                        |

## 7. References

1. J. Chen, F. Li, F. Wang, Y. Hu, Z. Zhang, M. Zhao and W. Zhang, *Org. Lett.*, 2019, **21**, 9060-9065.
2. T. Wang, L. Huang, S. Shi, M. Rudolph and A. S. Hashmi, *Chem. Eur. J.*, 2014, **20**, 14868-14871.
3. Y. Tokimizu, M. Wieteck, M. Rudolph, S. Oishi, N. Fujii, A. S. Hashmi and H. Ohno, *Org. Lett.*, 2015, **17**, 604-607.
4. L. Anhlada, M. Marquez, A. Sacristan and J. A. Ortiz., *Eur. J. Med. Chem.*, 1988, **23**, 97-100.
5. I. Hachiya, Y. Minami, T. Aramaki and M. Shimizu, *Eur. J. Org. Chem.*, 2008, **2008**, 1411-1417.
6. F. Ye, M. Haddad, V. Ratovelomanana-Vidal and V. Michelet, *Catal. Commun.*, 2018, **107**, 78-81.
7. L. Fu, Z. Zhang, P. Chen, Z. Lin and G. Liu, *J. Am. Chem. Soc.*, 2020, **142**, 12493-12500.
8. M. Hatano, H. Okamoto, T. Kawakami, K. Toh, H. Nakatsuji, A. Sakakura and K. Ishihara, *Chem. Sci.*, 2018, **9**, 6361-6367.
9. Gaussian 16 Rev. A.03, M. J. Frisch, G. W. Trucks, H. B. Schlegel, G. E. Scuseria, M. A. Robb, J. R. Cheeseman, G. Scalmani, V. Barone, G. A. Petersson, H. Nakatsuji, X. Li, M. Caricato, A. V. Marenich, J. Bloino, B. G. Janesko, R. Gomperts, B. Mennucci, H. P. Hratchian, J. V. Ortiz, A. F. Izmaylov, J. L. Sonnenberg, Williams, F. Ding, F. Lipparini, F. Egidi, J. Goings, B. Peng, A. Petrone, T. Henderson, D. Ranasinghe, V. G. Zakrzewski, J. Gao, N. Rega, G. Zheng, W. Liang, M. Hada, M. Ehara, K. Toyota, R. Fukuda, J. Hasegawa, M. Ishida, T. Nakajima, Y. Honda, O. Kitao, H. Nakai, T. Vreven, K. Throssell, J. A. Montgomery Jr., J. E. Peralta, F. Ogliaro, M. J. Bearpark, J. J. Heyd, E. N. Brothers, K. N. Kudin, V. N. Staroverov, T. A. Keith, R. Kobayashi, J. Normand, K. Raghavachari, A. P. Rendell, J. C. Burant, S. S. Iyengar, J. Tomasi, M. Cossi, J. M. Millam, M. Klene, C. Adamo, R. Cammi, J. W. Ochterski, R. L. Martin, K. Morokuma, O. Farkas, J. B. Foresman and D. J. Fox, Gaussian Inc. Wallingford CT, 2016.
10. A. D. Becke, *J. Chem. Phys.*, 1993, **98**, 5648-5652.
11. C. Lee, W. Yang and R. G. Parr, *Phys. Rev. B. Condens. Matter.*, 1988, **37**, 785-789.
12. F. Weigend, *Phys. Chem. Chem. Phys.*, 2006, **8**, 1057-1065.
13. F. Weigend and R. Ahlrichs, *Phys. Chem. Chem. Phys.*, 2005, **7**, 3297-3305.
14. S. Grimme, S. Ehrlich and L. Goerigk, *J. Comput. Chem.*, 2011, **32**, 1456-1465.
15. Y. Zhao and D. G. Truhlar, *Theor. Chem. Acc.*, 2007, **120**, 215-241.
16. A. V. Marenich, C. J. Cramer and D. G. Truhlar, *J. Phys. Chem. B.*, 2009, **113**, 6378-6396.
17. S. Grimme, *Chemistry.*, 2012, **18**, 9955-9964.
18. G. Luchini, J. Alegre-Requena, I. Funes-Ardoiz and R. Paton, *F1000Research*, 2020, **9**, DOI: 10.12688/f1000research.22758.12681.
19. CYLview, 2.0b, C. Y. Legault, Universit e de Sherbrooke, 2009.
